# Supplementary material for: Synthesis and SAR of 2,4-diaminopyrimidines as potent c-jun N-terminal kinase inhibitors
Source: Royal Society of Chemistry journal article supplement (doi:10.1039/c1md00219h), 2011-12-02
Supplement: c1md00219h_2.pdf [file c1md00219h_2.pdf]

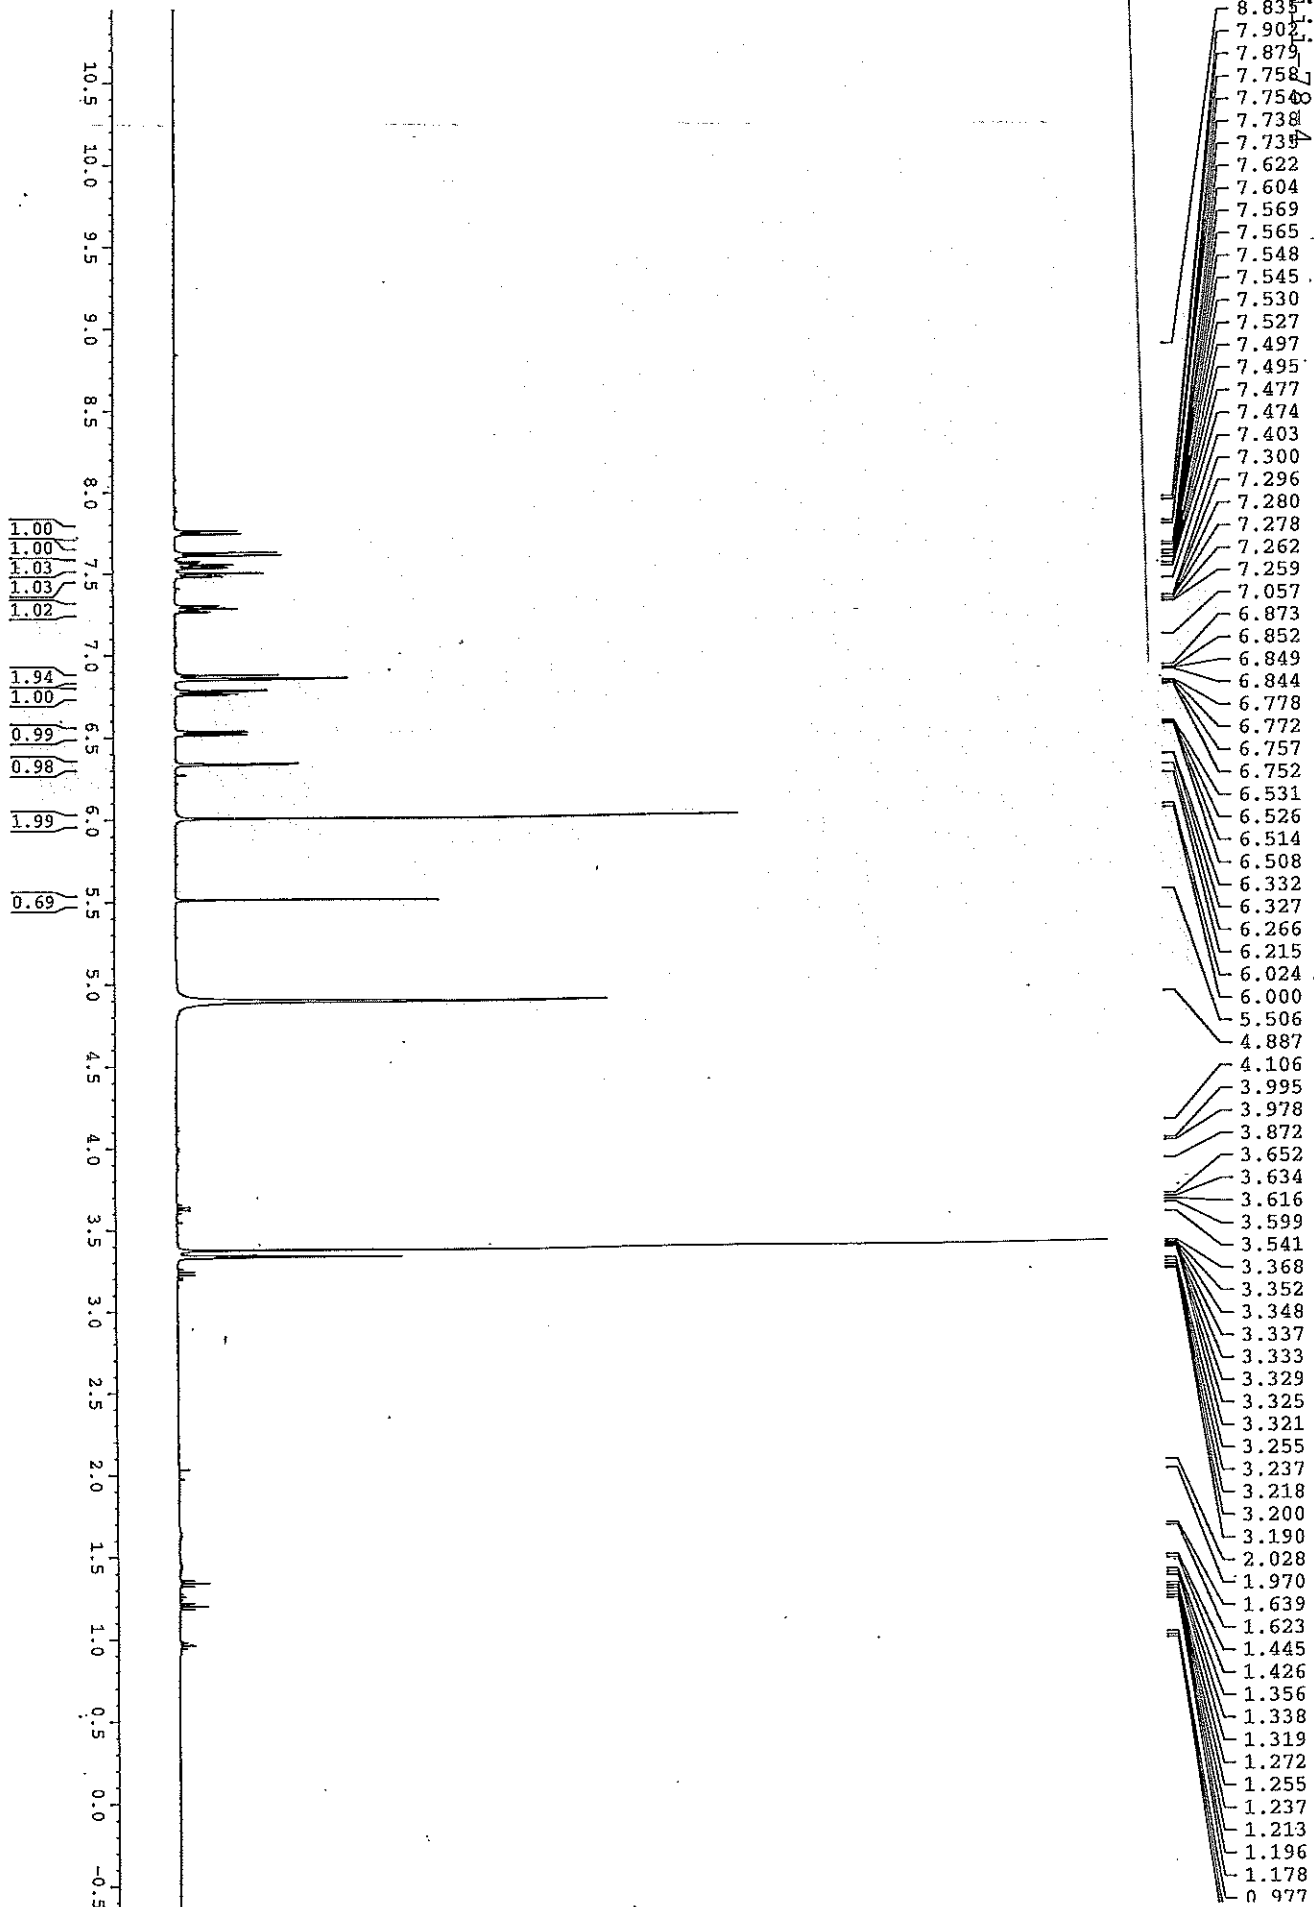

Compound 35 D<sub>4</sub>-MeOH

PROTON\_NP

Compound 3b  
Diethyl

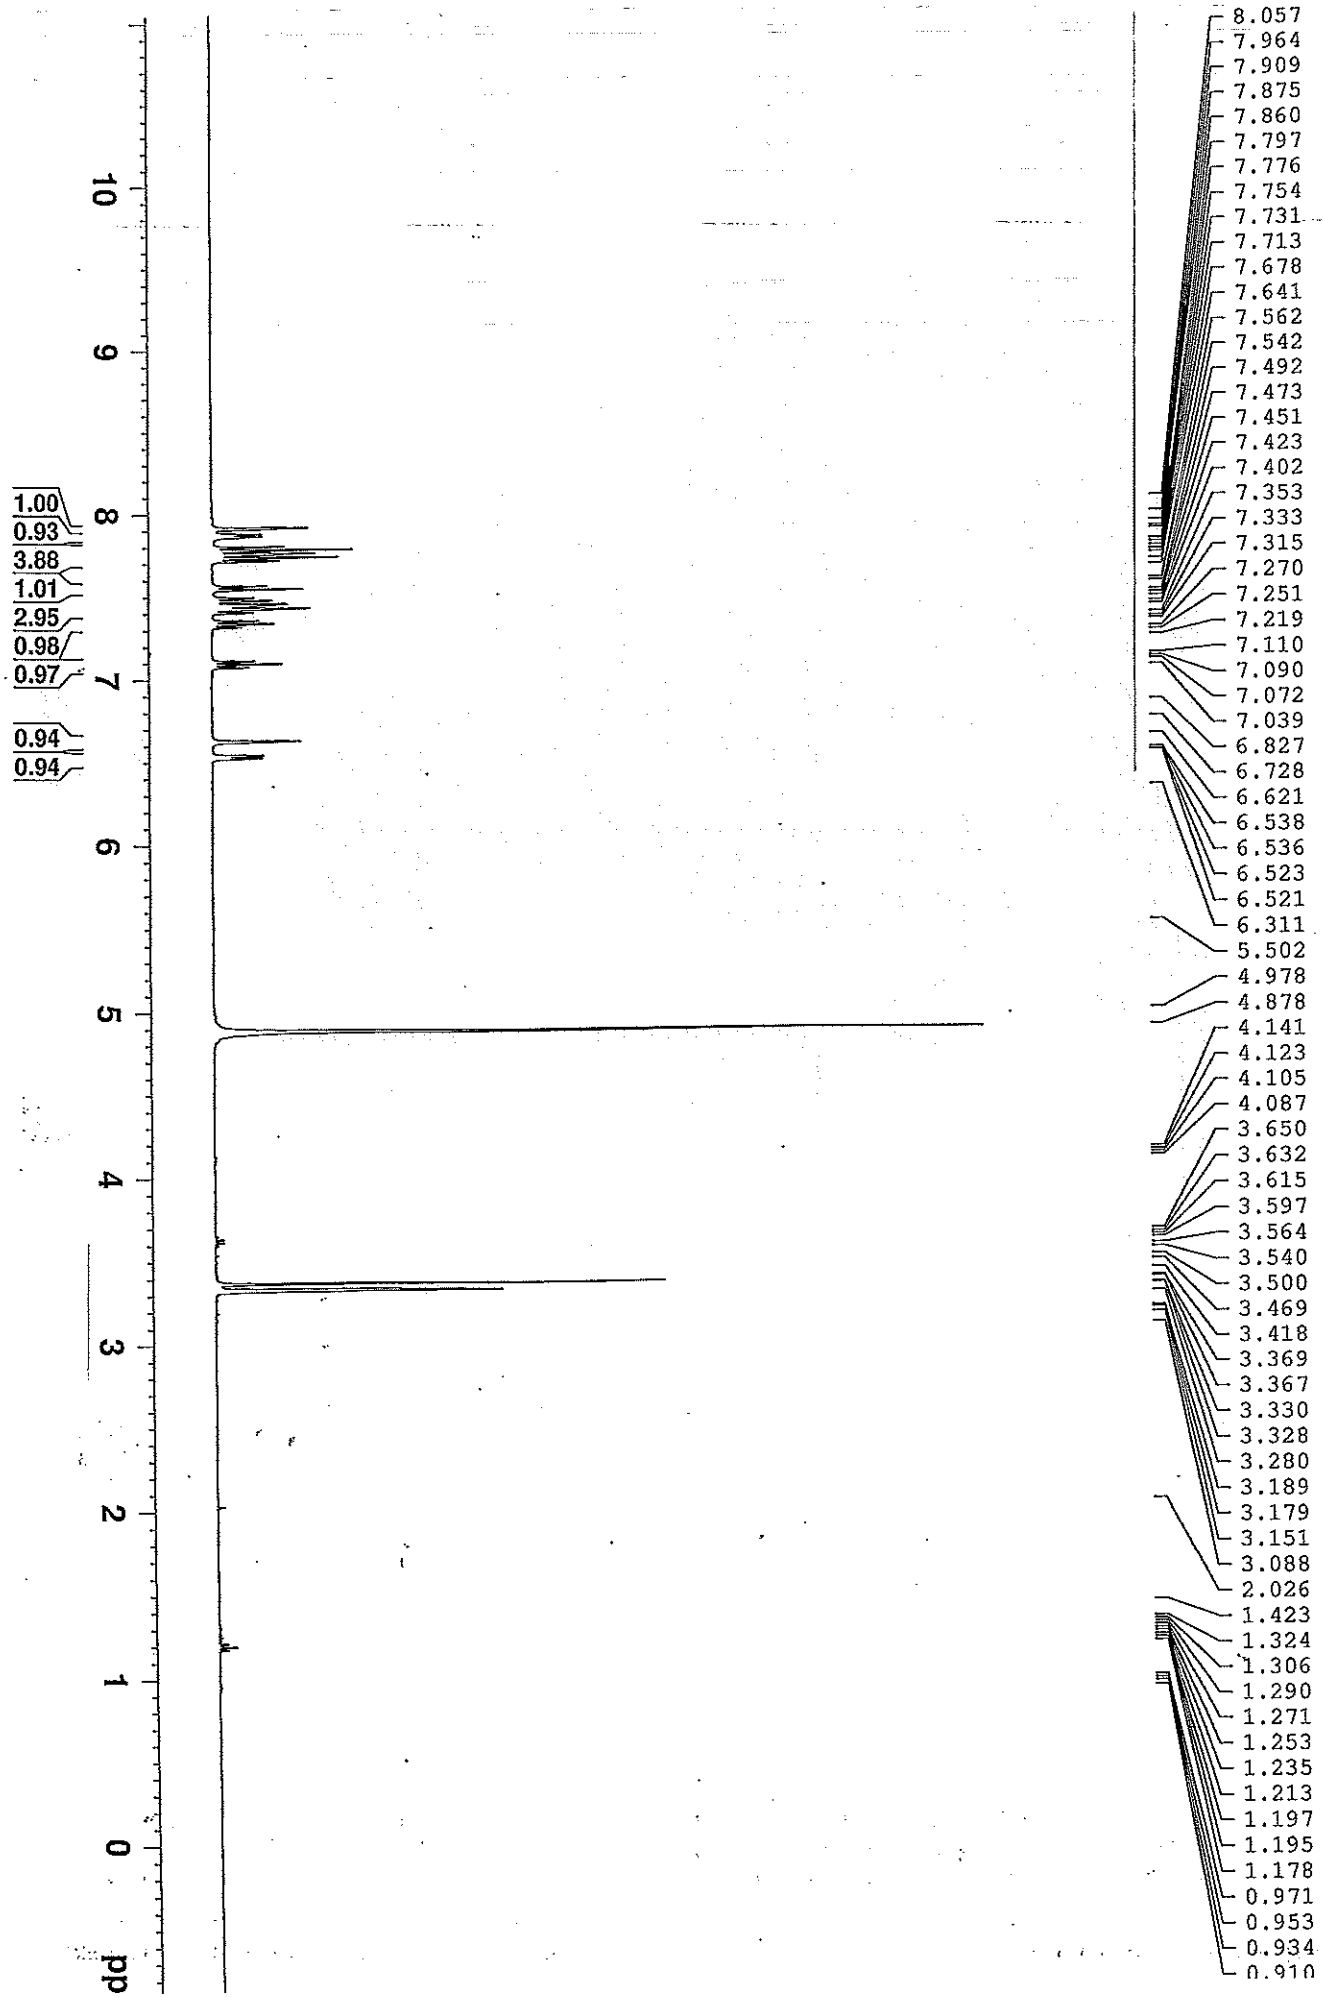

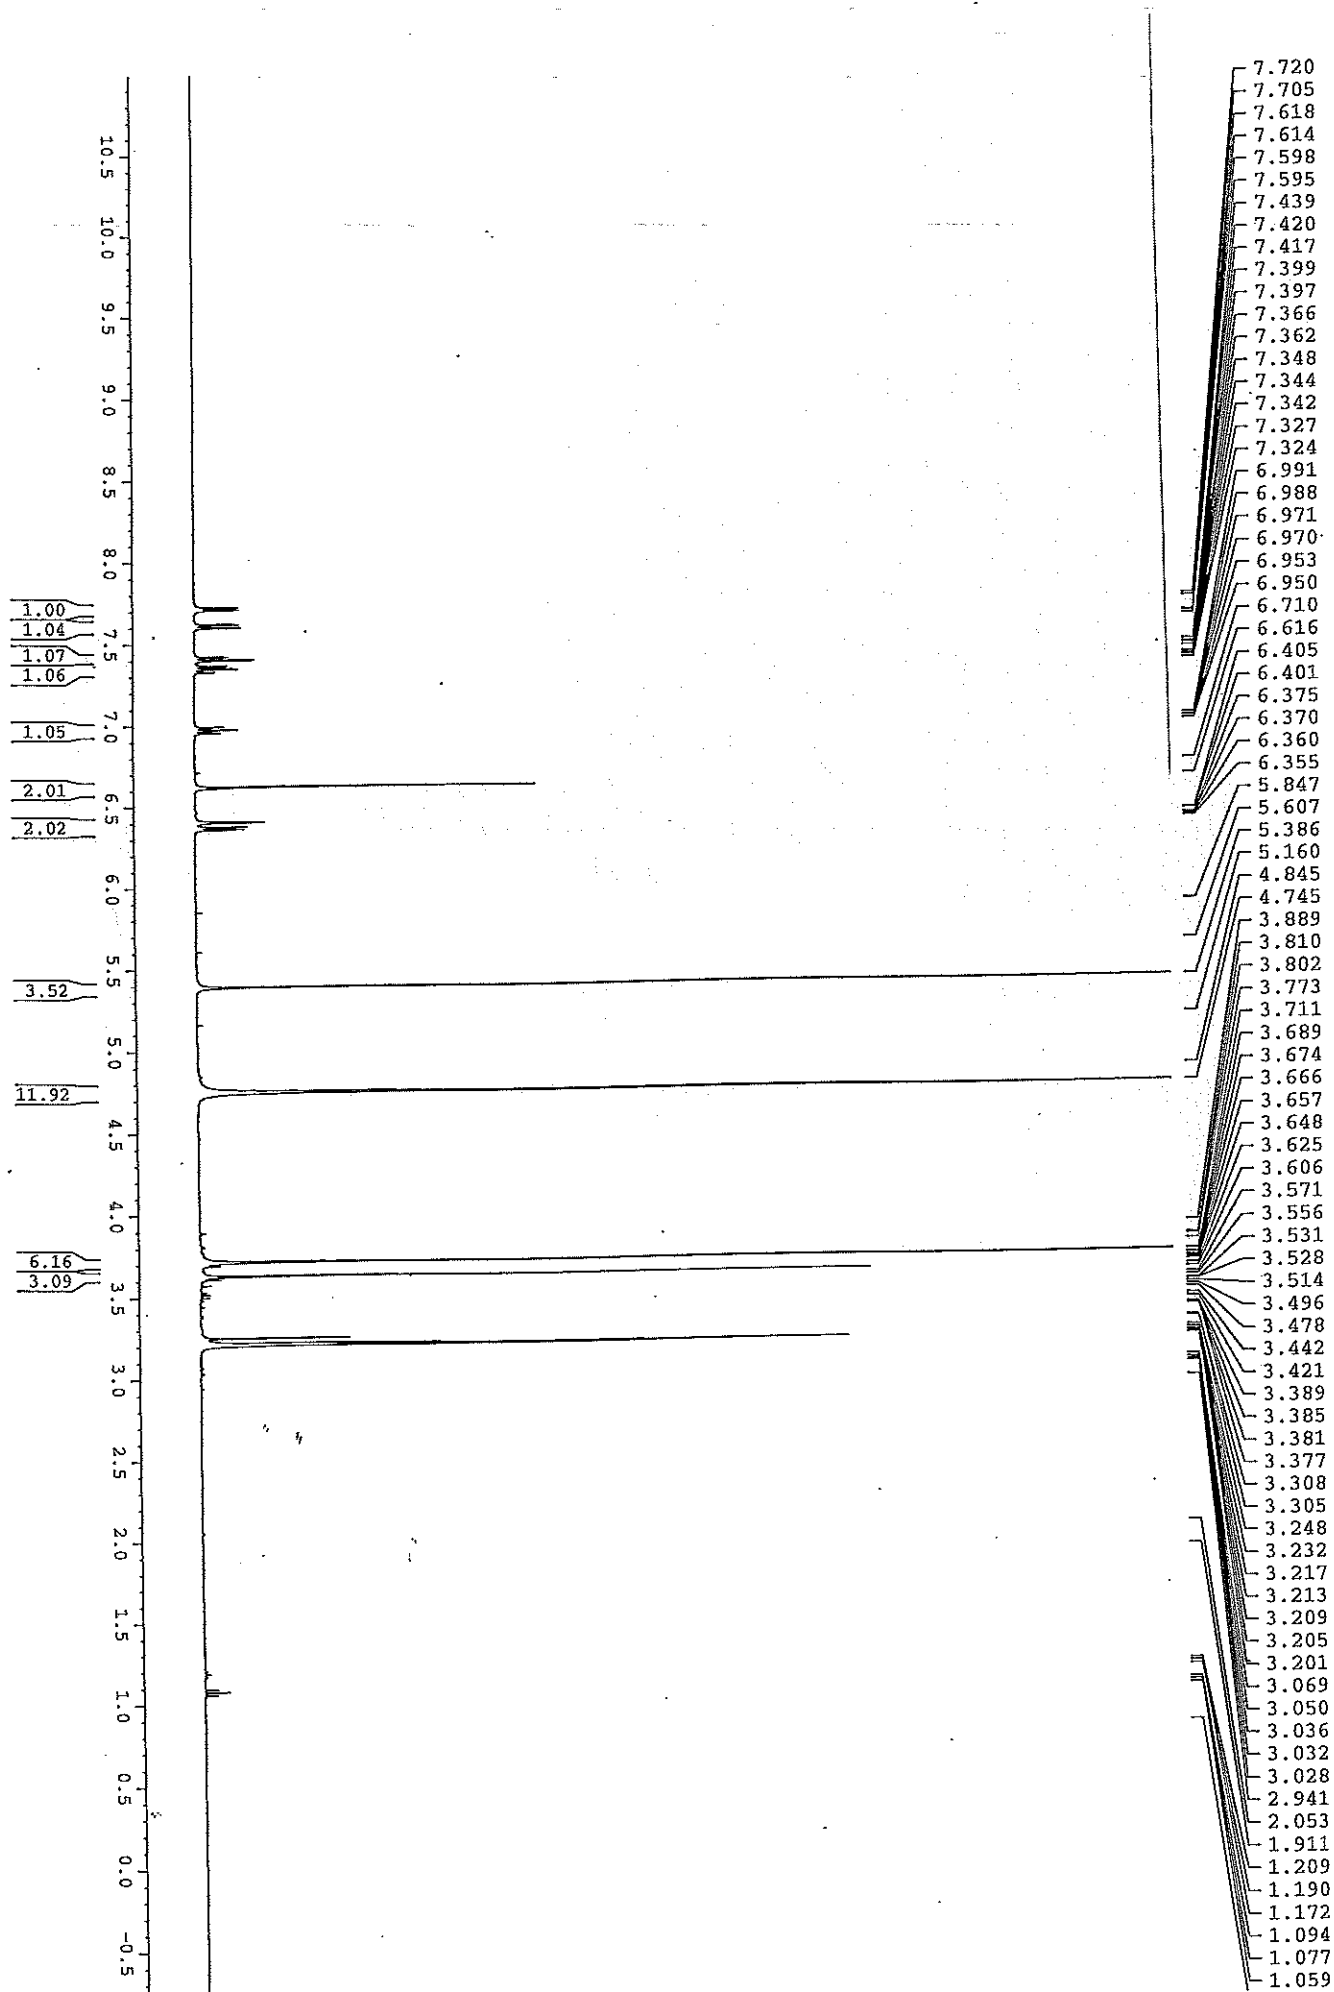

Compound 37  
D<sub>4</sub>-MeOH

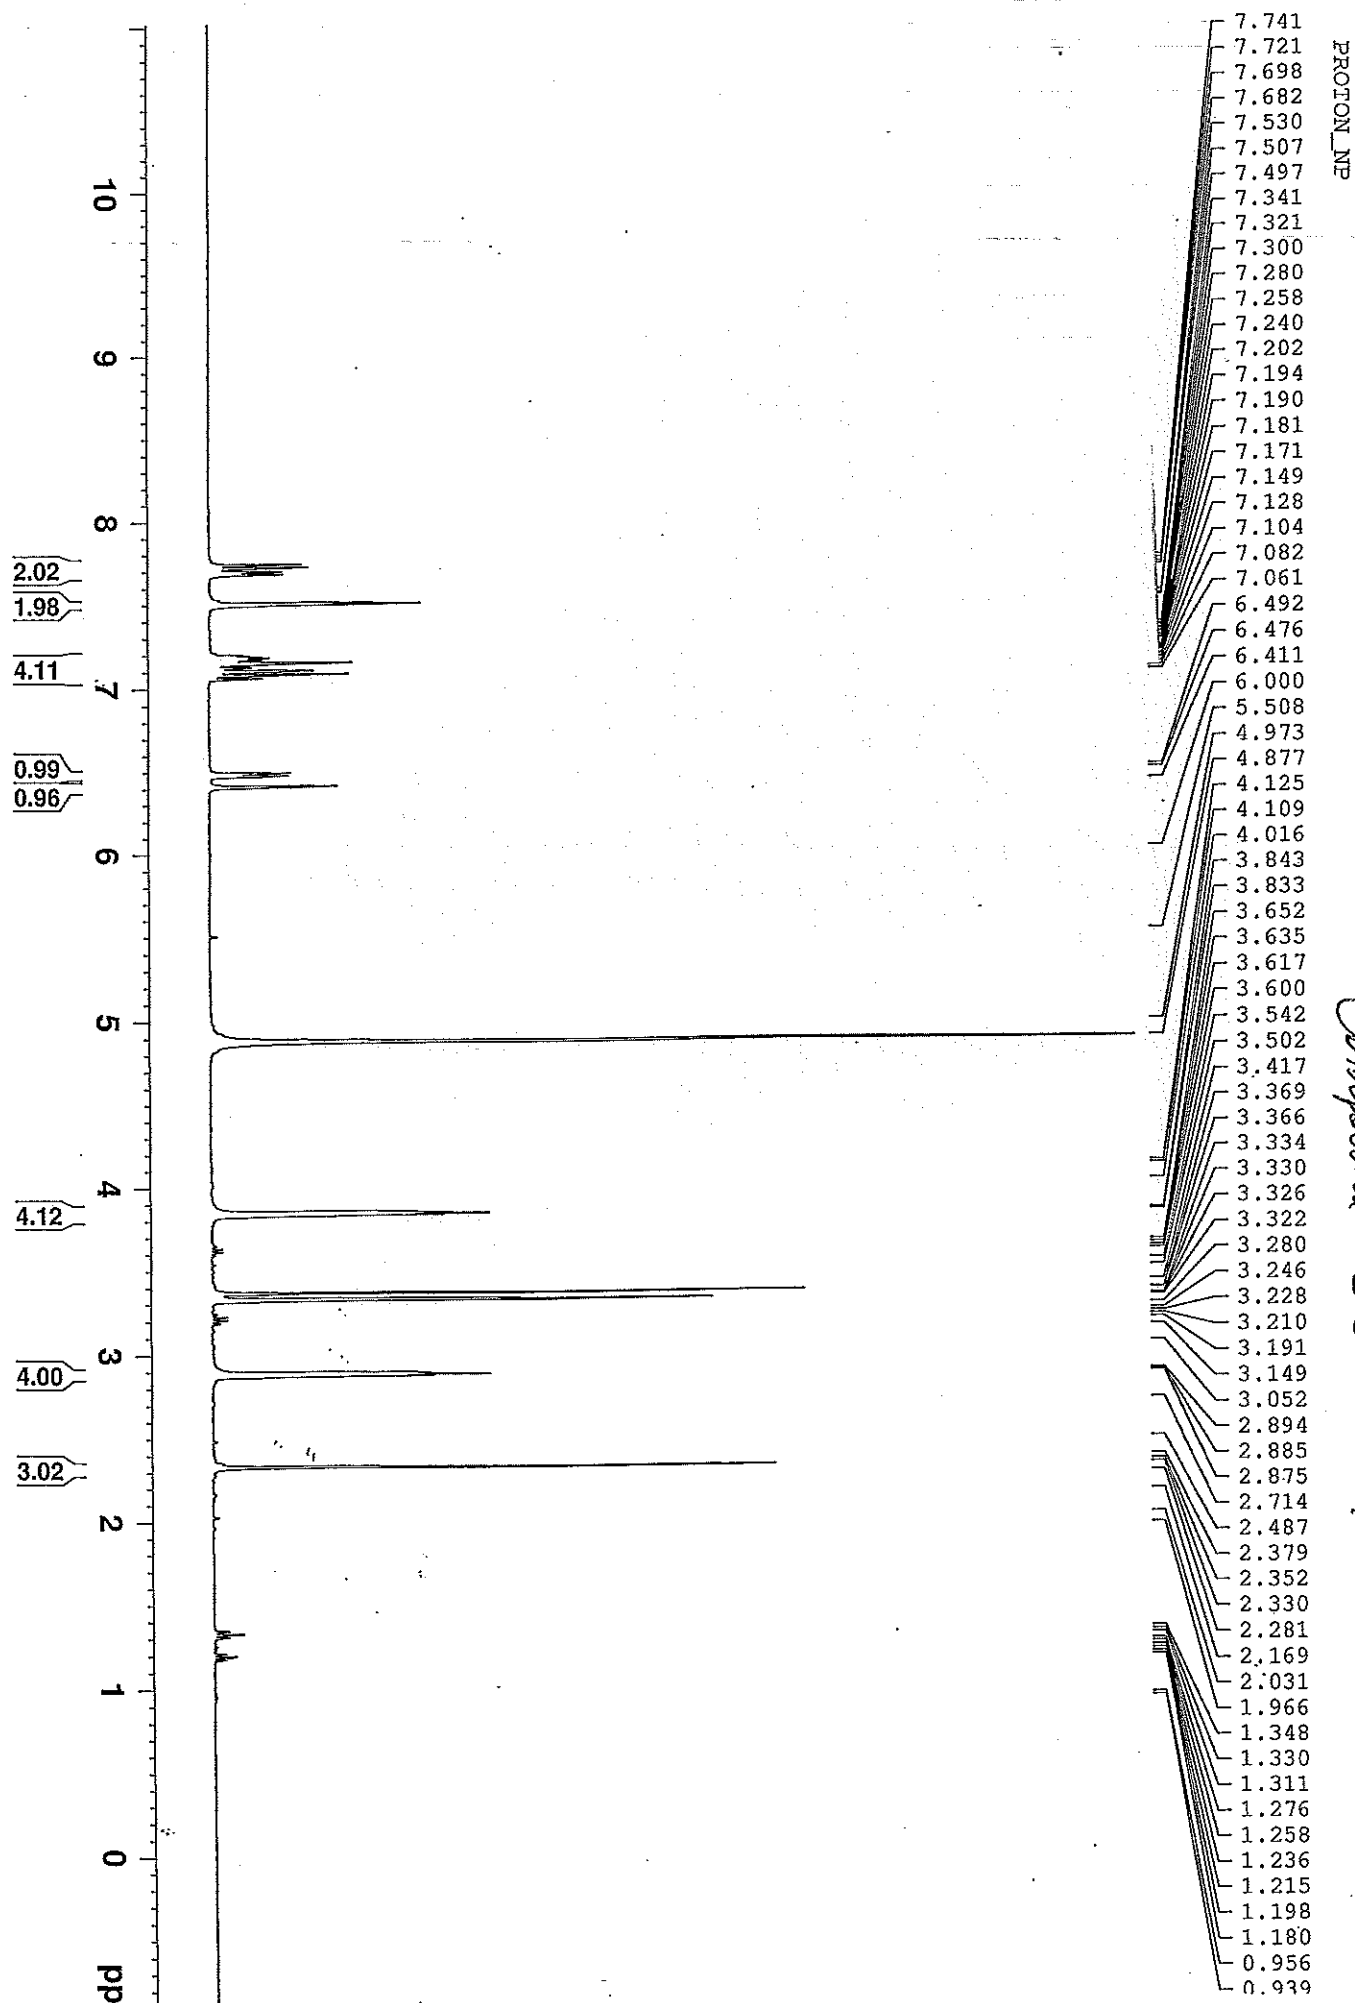

6800-2

Compound 42 D<sub>2</sub>O-DMSO

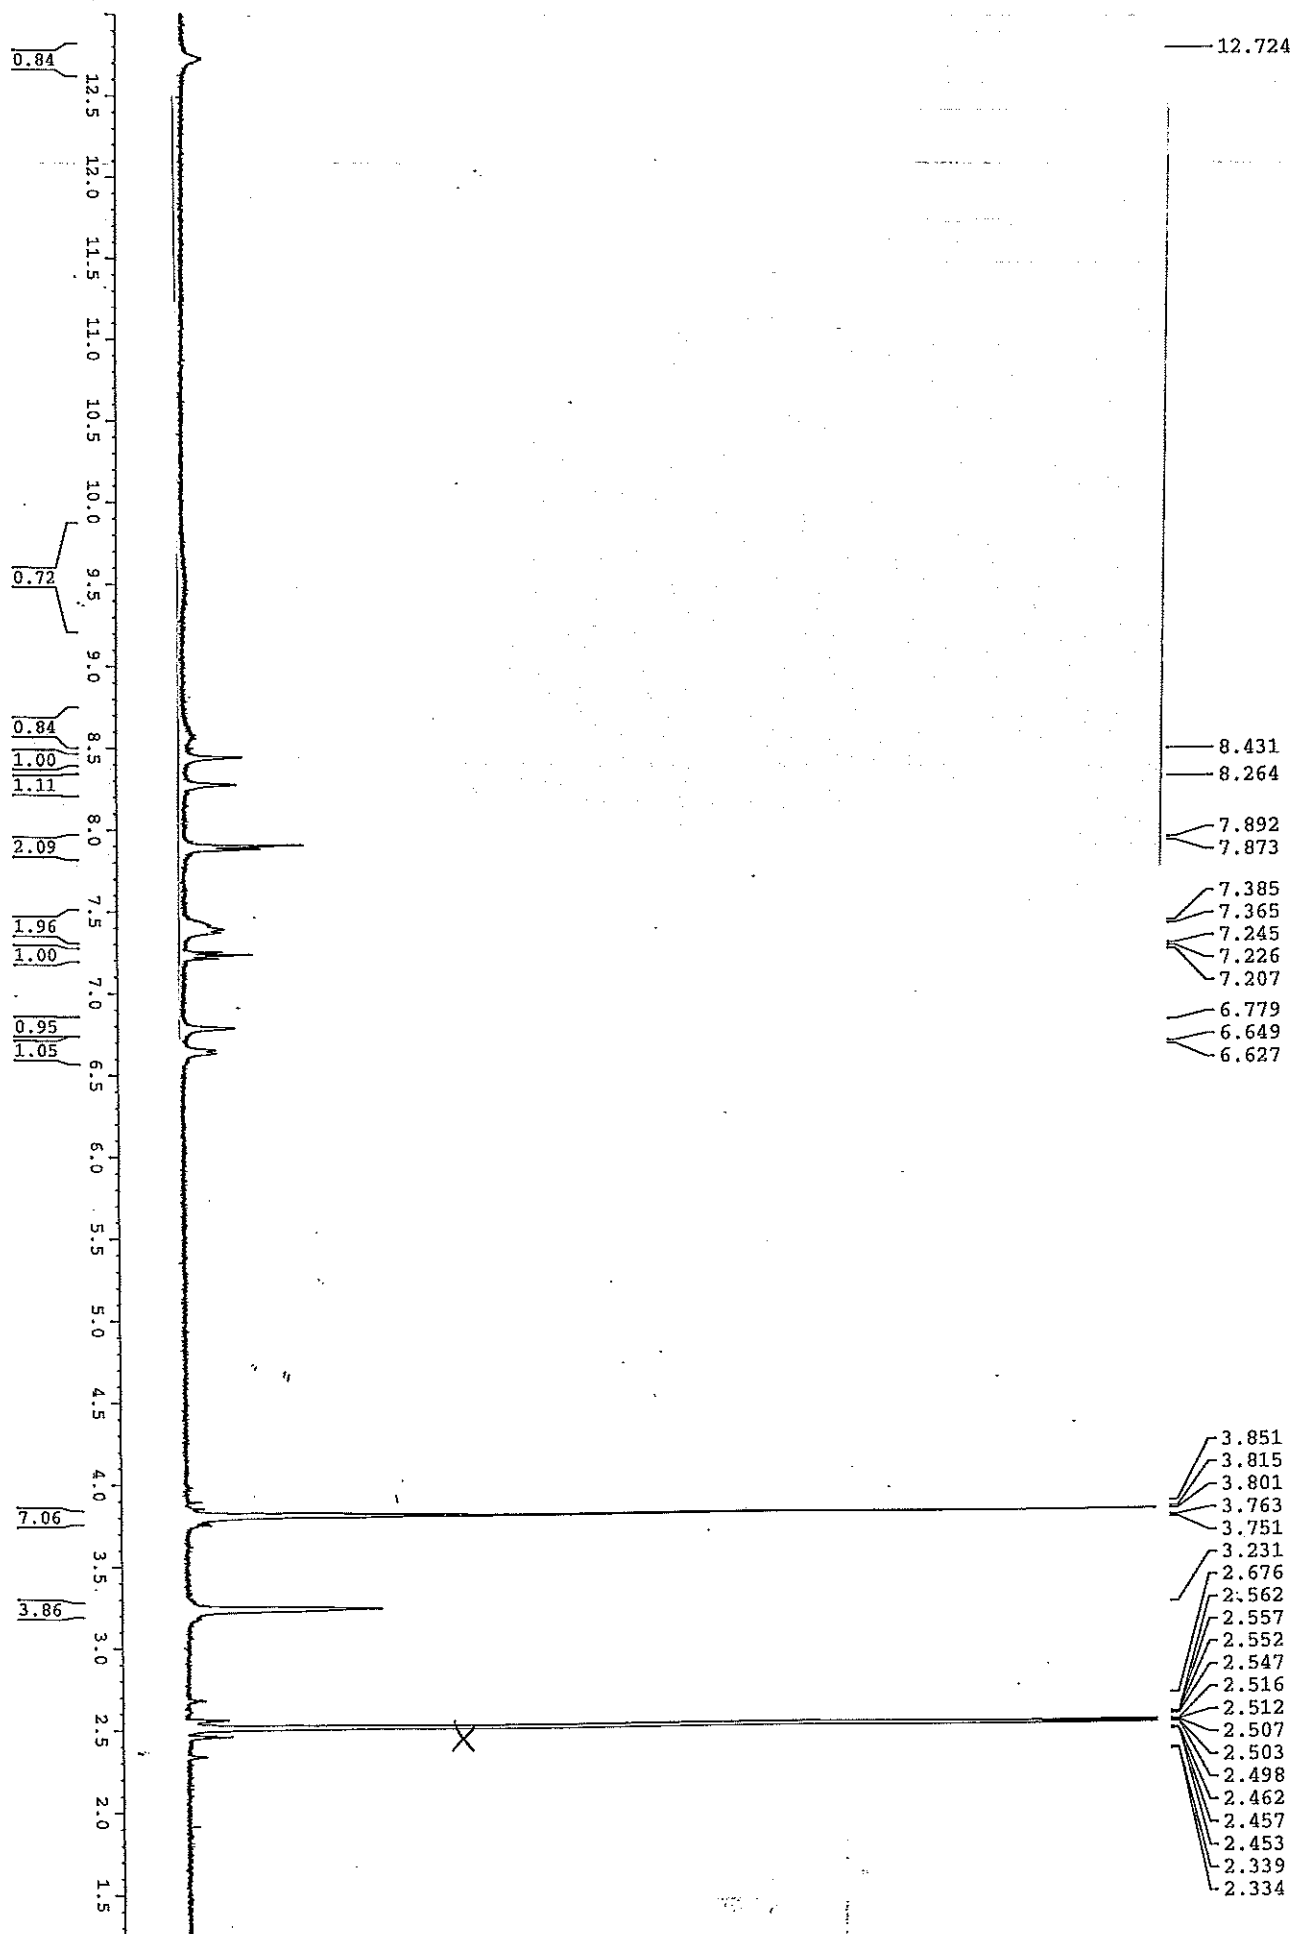

6801-2  
PROTON\_NP

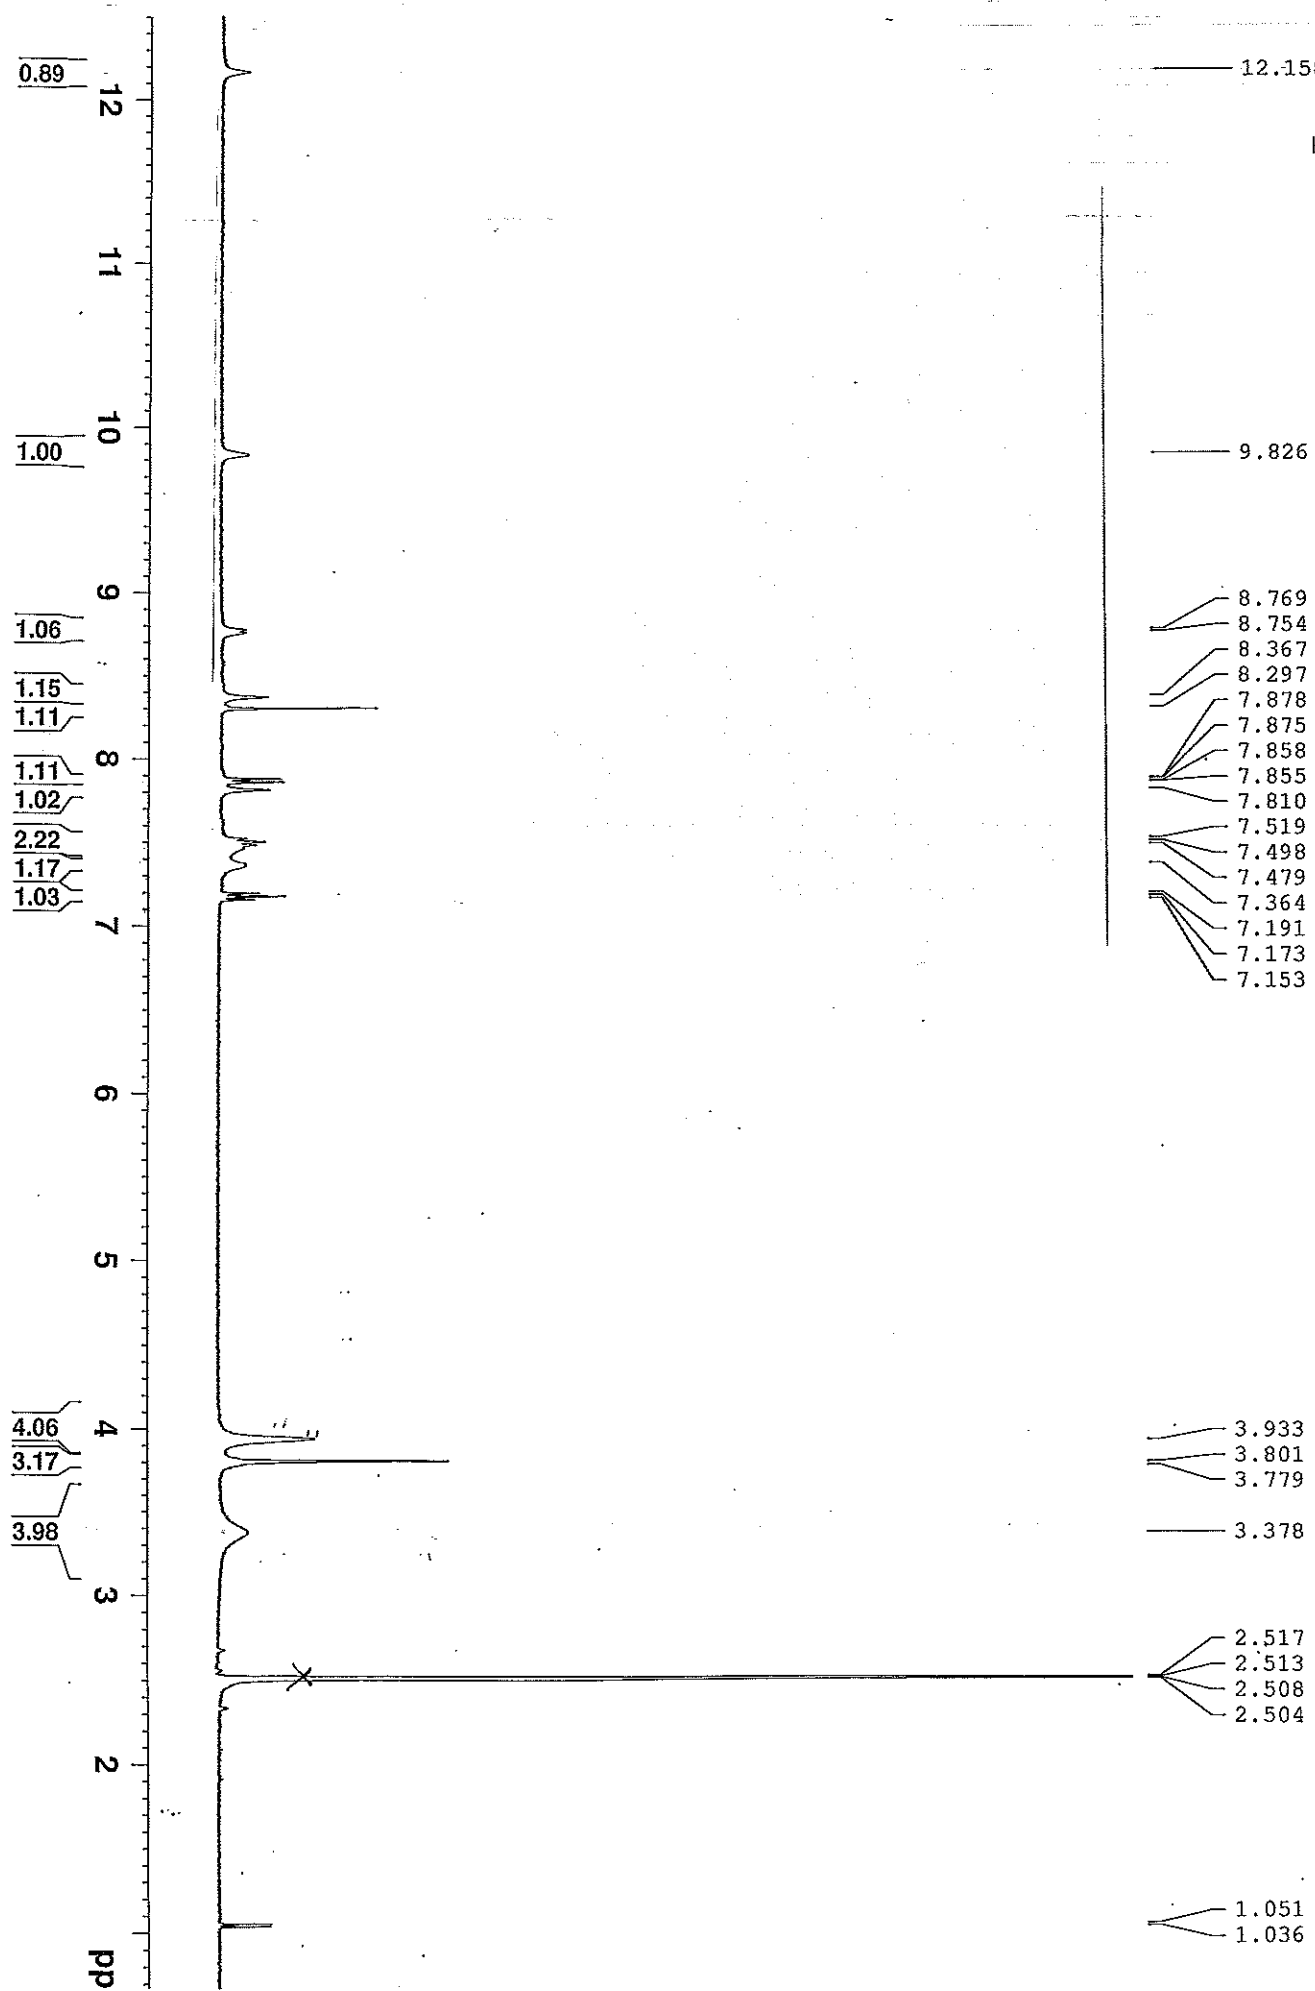

Compound 47  
D<sub>2</sub>O

x3

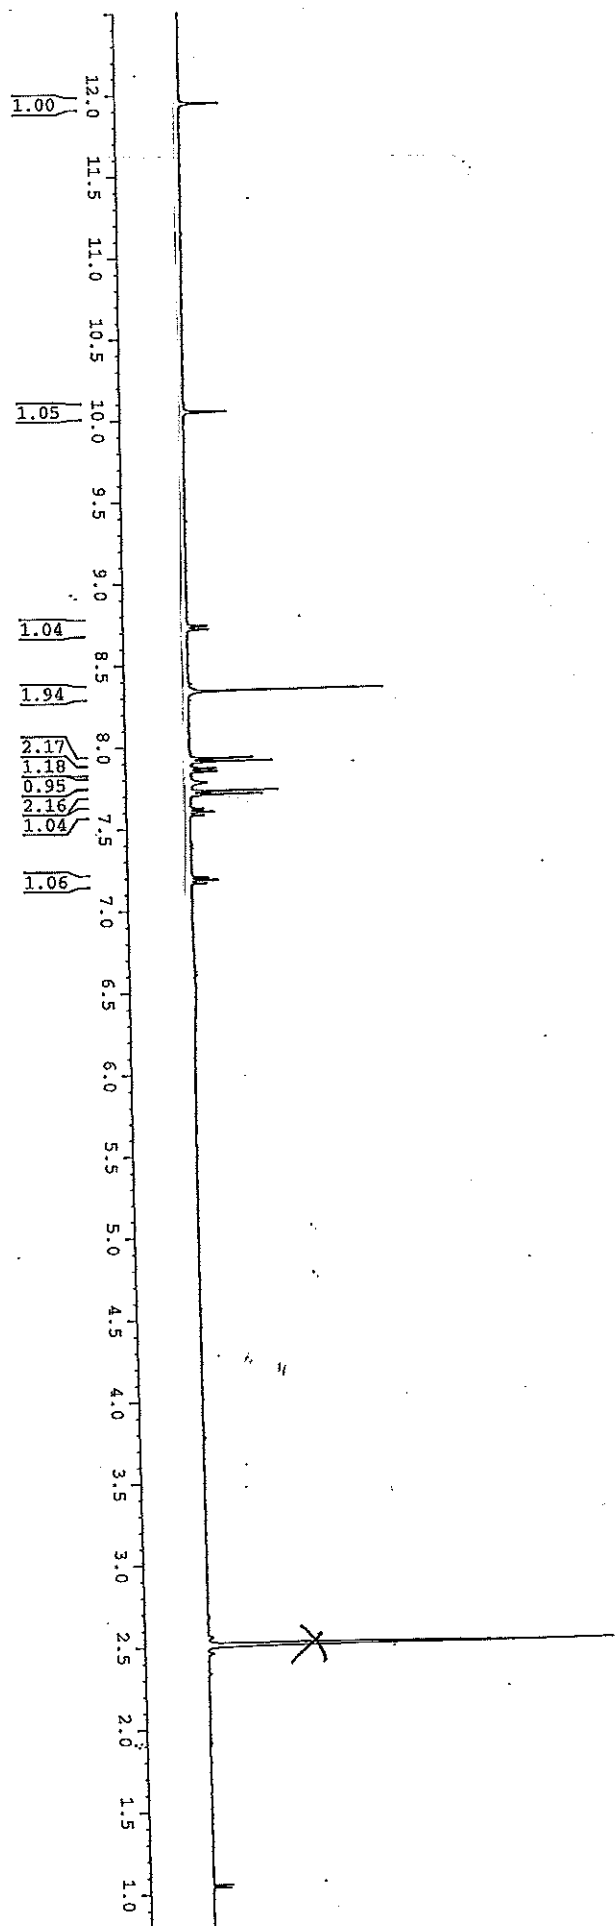

11.940

10.043

8.731  
8.710  
8.331  
7.923  
7.918  
7.906  
7.901  
7.867  
7.863  
7.847  
7.844  
7.777  
7.725  
7.720  
7.708  
7.703  
7.620  
7.616  
7.601  
7.598  
7.580  
7.577  
7.201  
7.198  
7.180  
7.163  
7.160

Compound 51 D<sub>6</sub>-DMSO

2.516  
2.512  
2.507  
2.503  
2.498

1.051  
1.036

x1

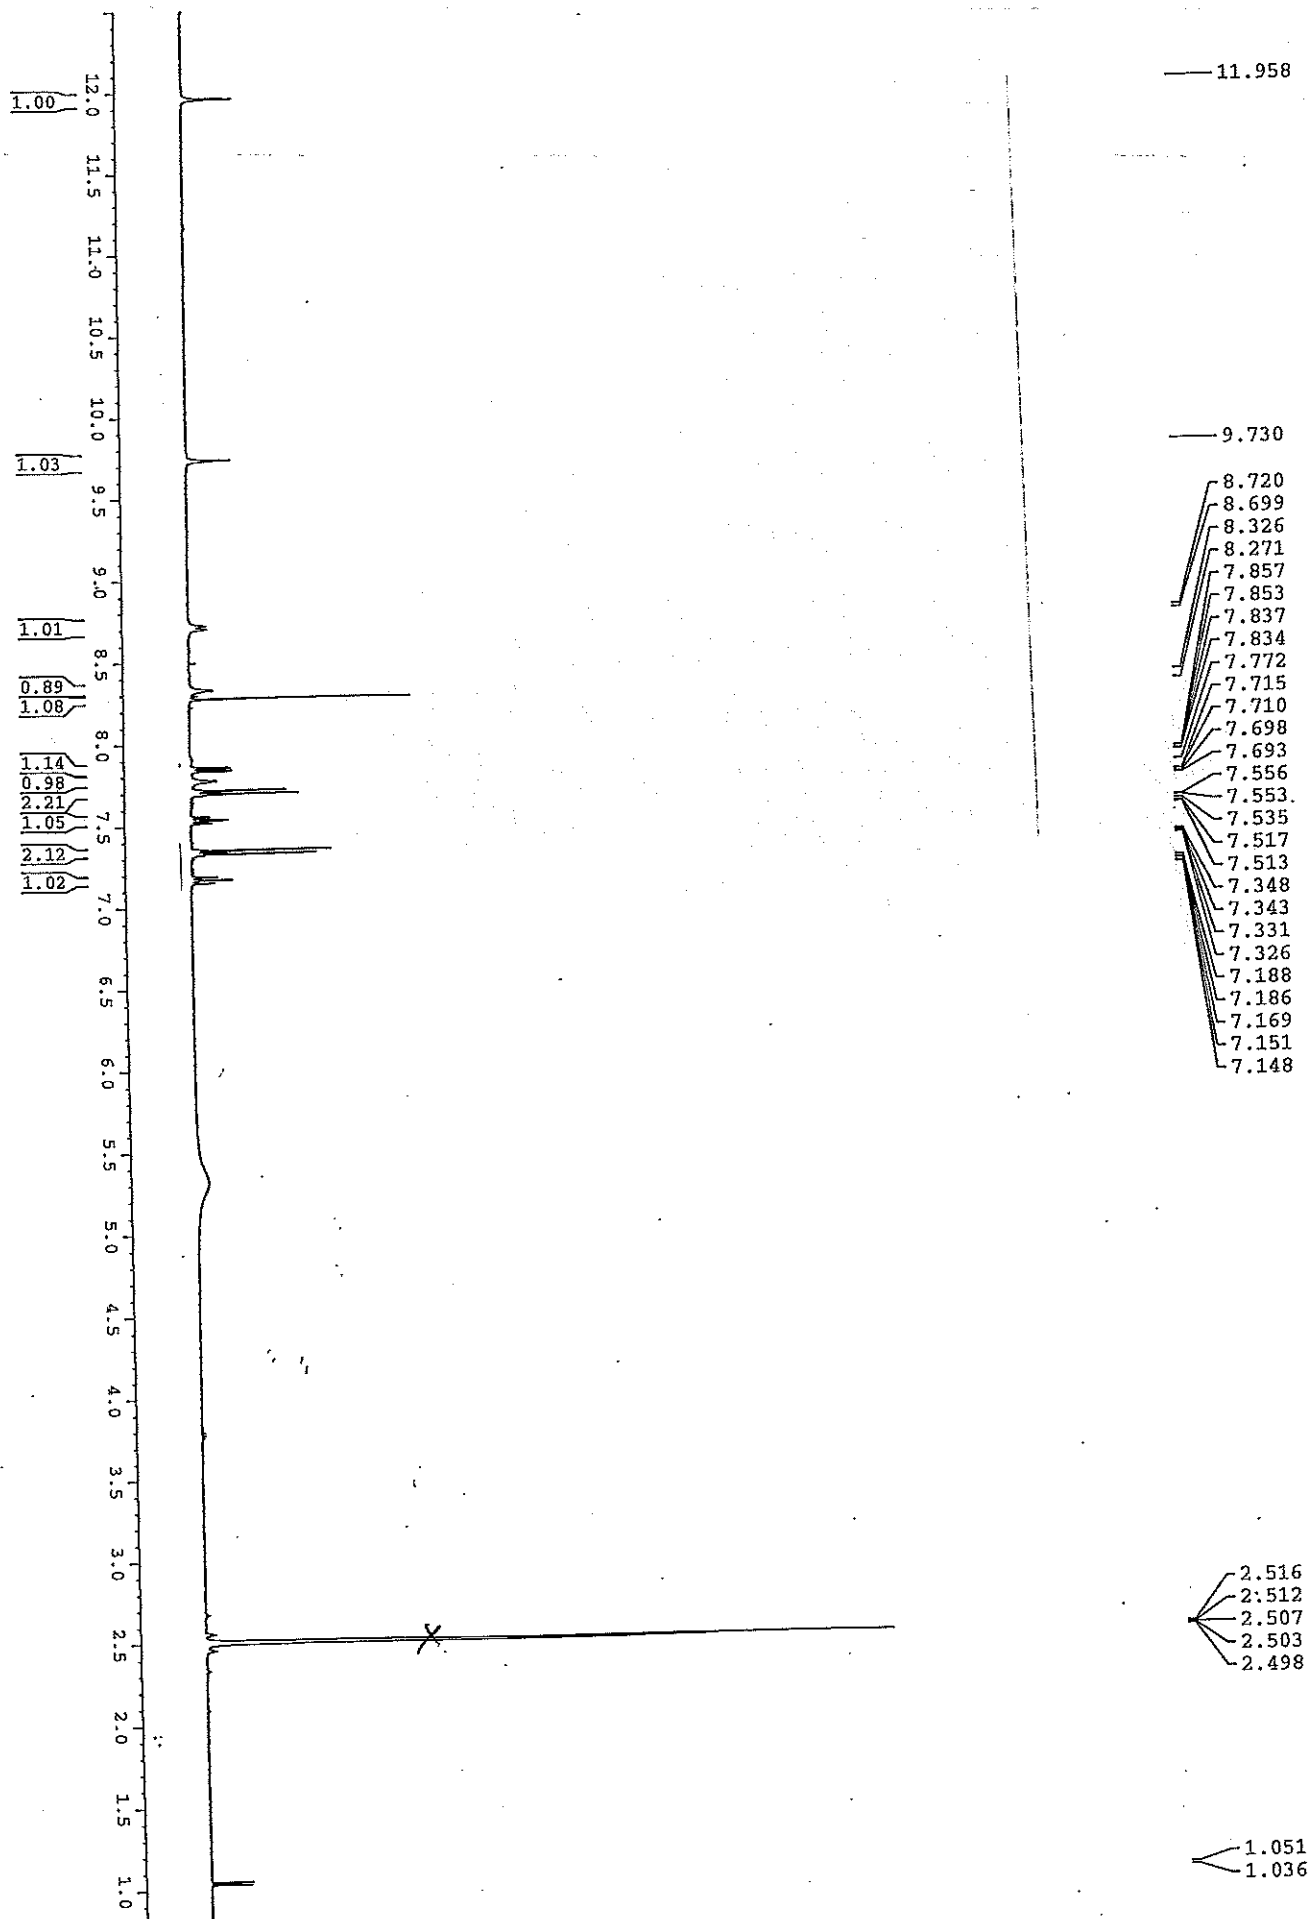

Compound 5a  
D<sub>6</sub>-DMSO
