# Supplementary material for: Synthesis and SAR of 2,4-diaminopyrimidines as potent c-jun N-terminal kinase inhibitors
Source: Royal Society of Chemistry journal article supplement (doi:10.1039/c1md00219h), 2011-12-02
Supplement: c1md00219h_3.pdf [file c1md00219h_3.pdf]

Compound 24

MKVIII27-1 #293-325 RT: 3.84-4.21 AV: 33 NL: 9.82E7  
T: + c ESI Full ms [ 150.00-800.00]

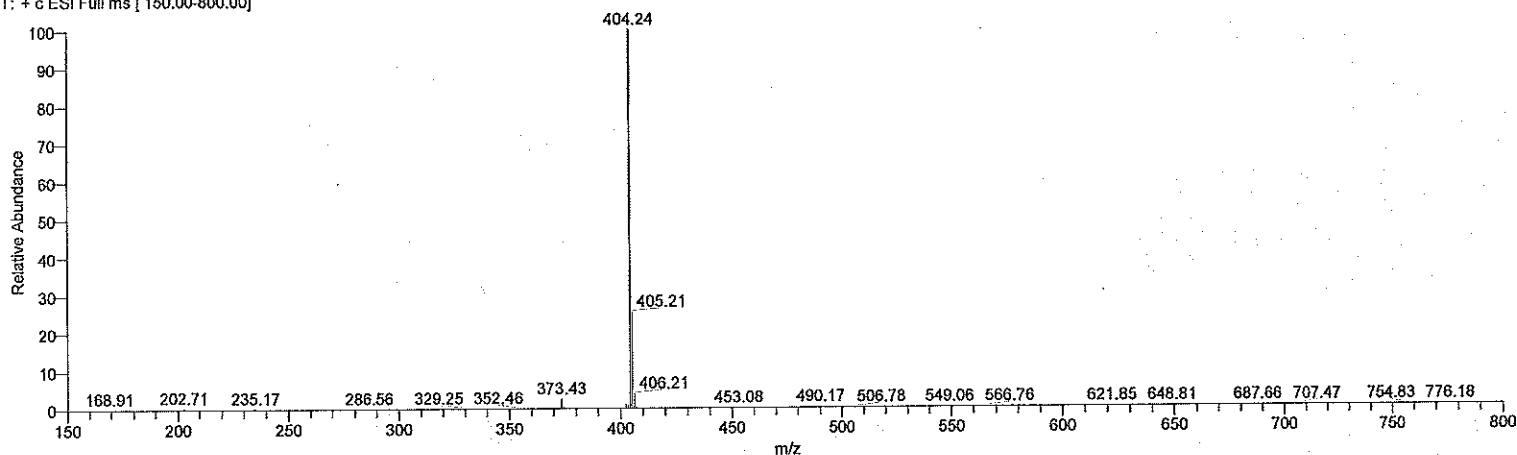

RT: 0.00 - 6.99

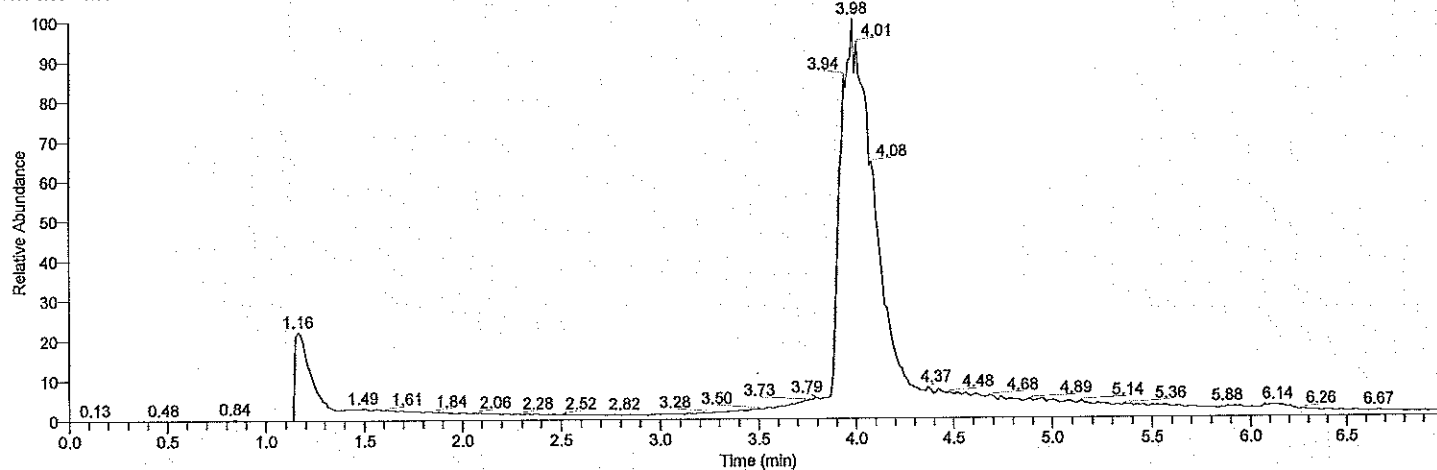

NL:  
2.56E8  
TIC F: MS  
MKVIII27-1

RT: 0.00 - 7.00

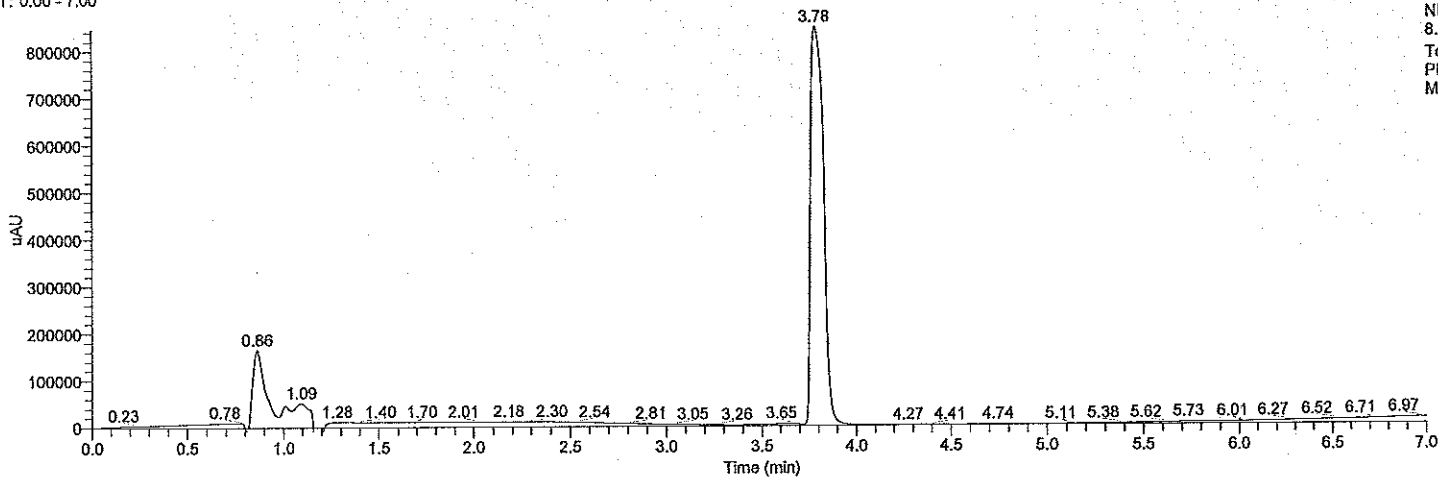

NL:  
8.47E5  
Total Scan  
PDA  
MKVIII27-1

RT: 0.00 - 7.00

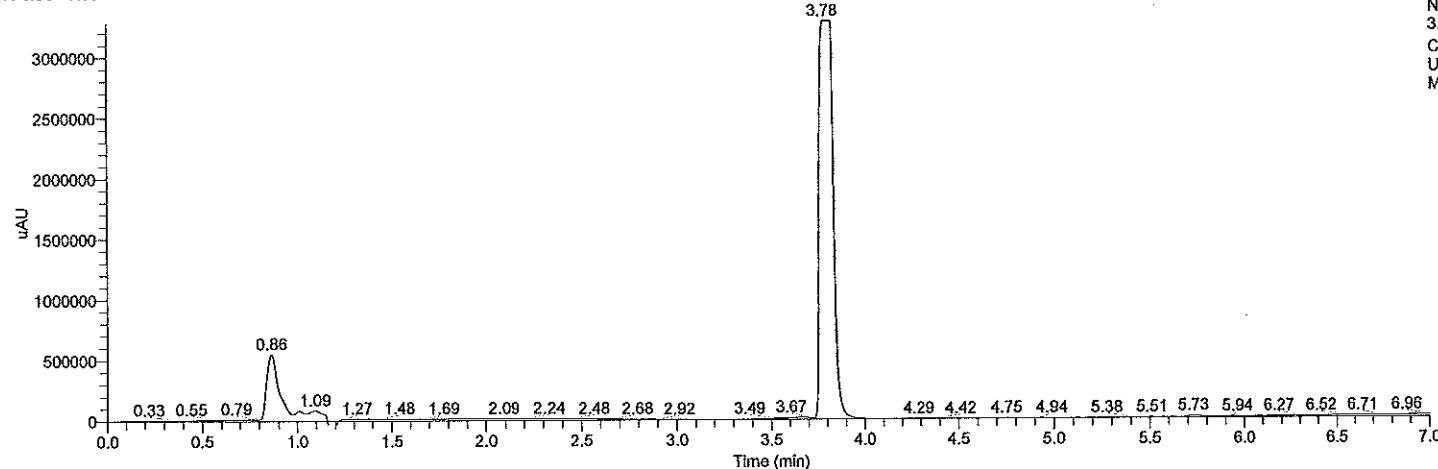

NL:  
3.28E6  
Channel A  
UV  
MKVIII27-1

Compound 25

4759 #324-362 RT: 4.25-4.70 AV: 39 NL: 6.30E7  
T: + c ESI Full ms [ 150.00-800.00]

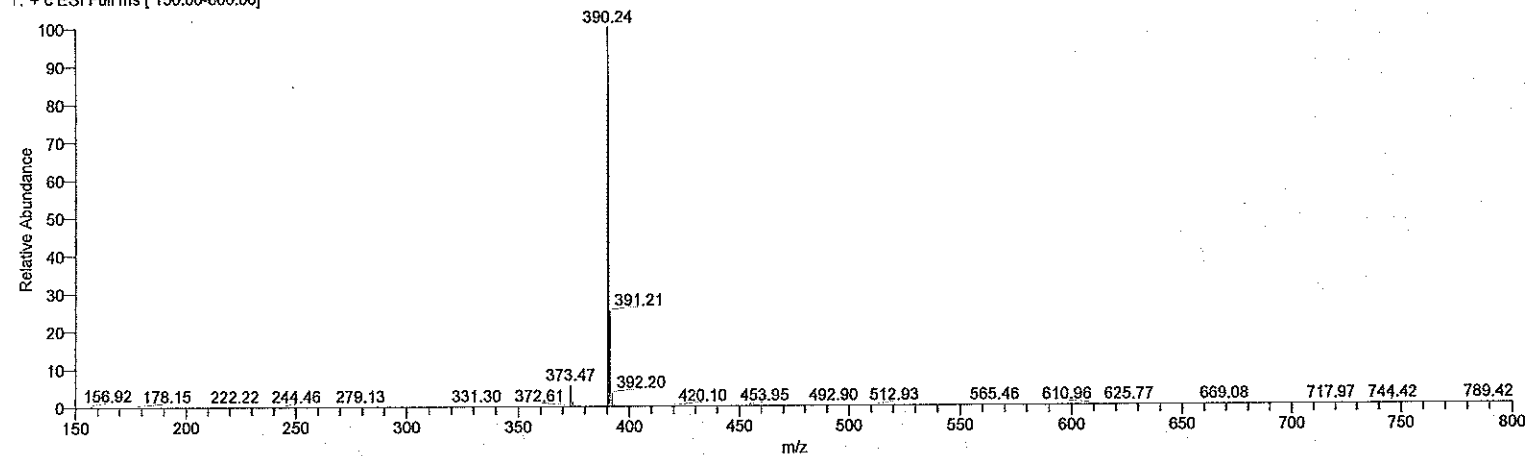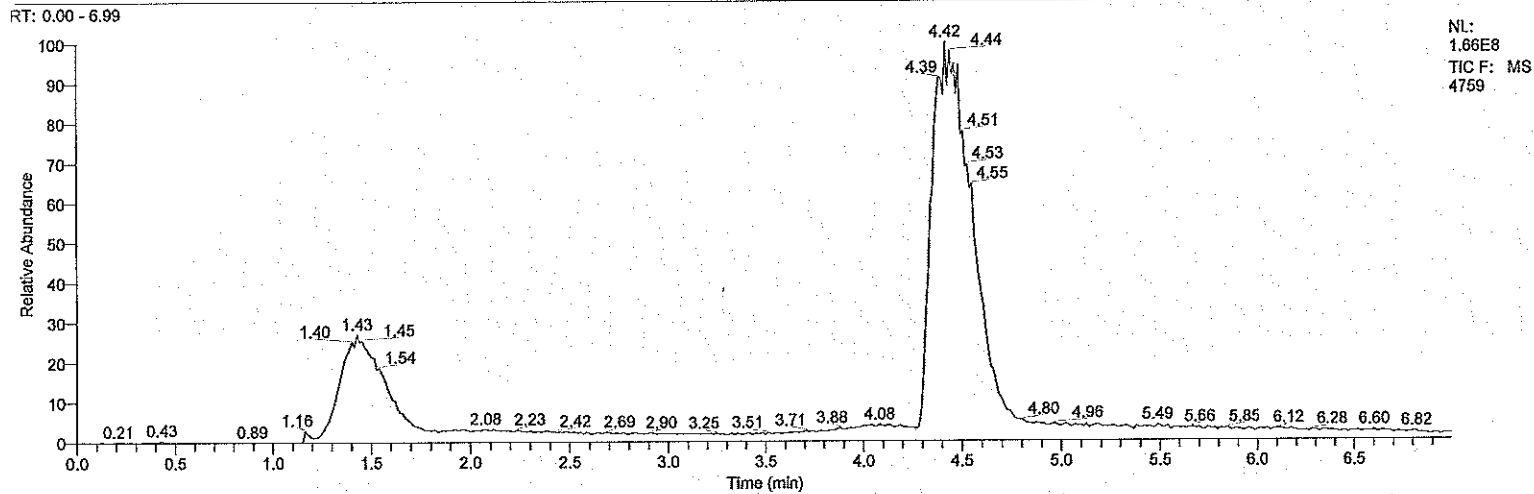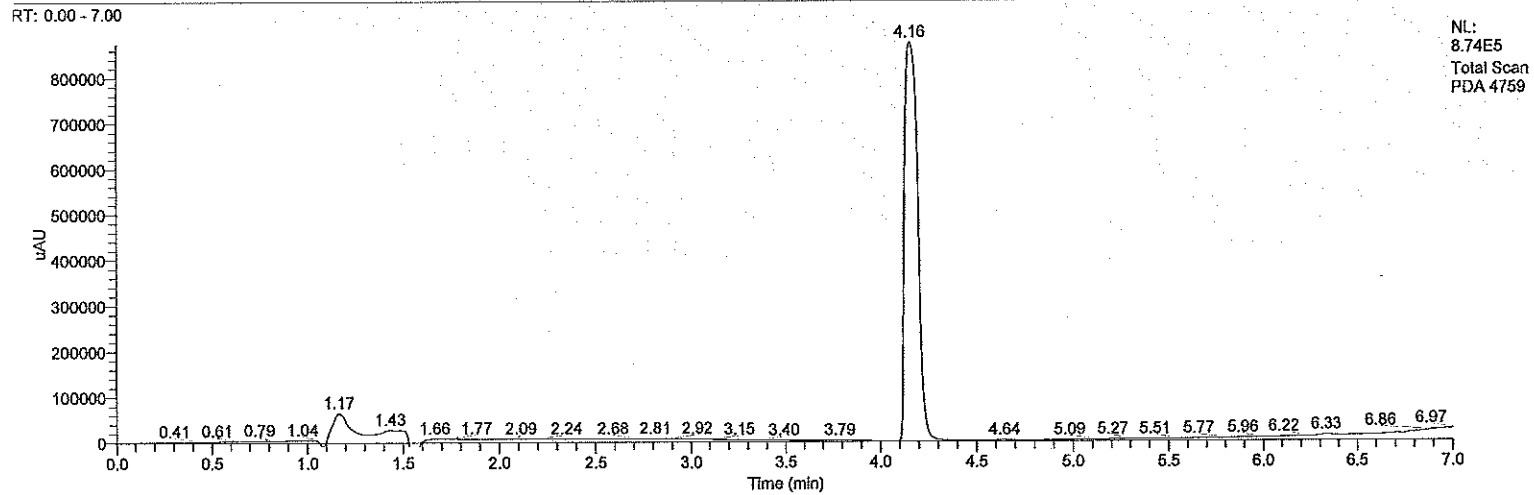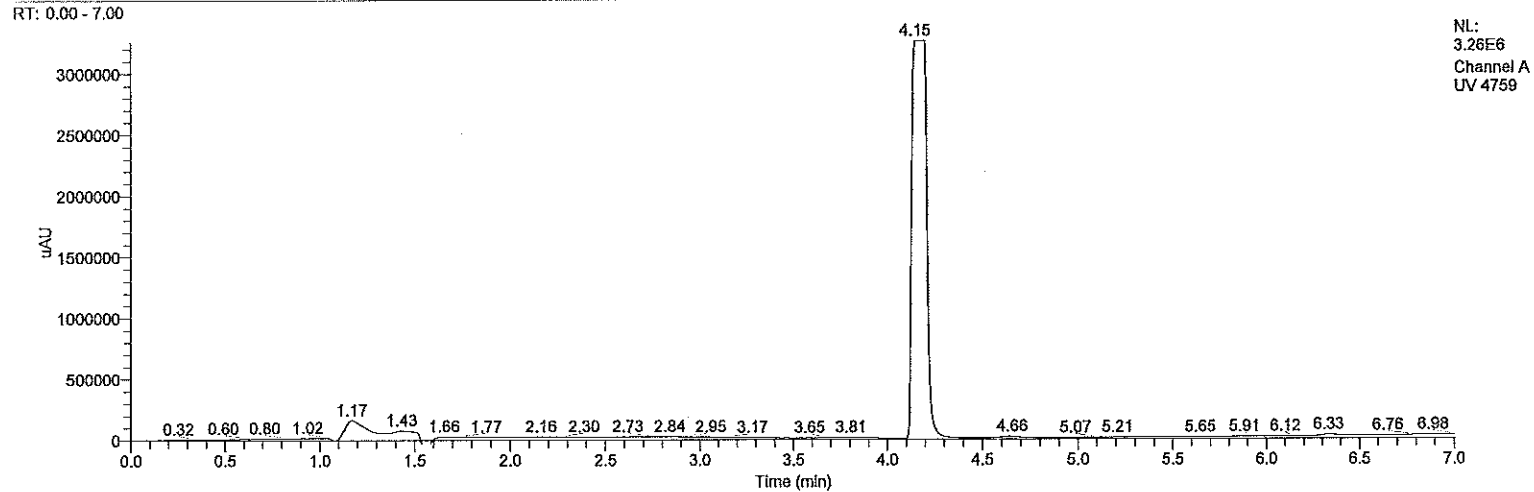

Compound 26

5617 #267-328 RT: 3.54-4.21 AV: 62 NL: 1.57E8  
T: + c ESI Full ms [ 150.00-800.00]

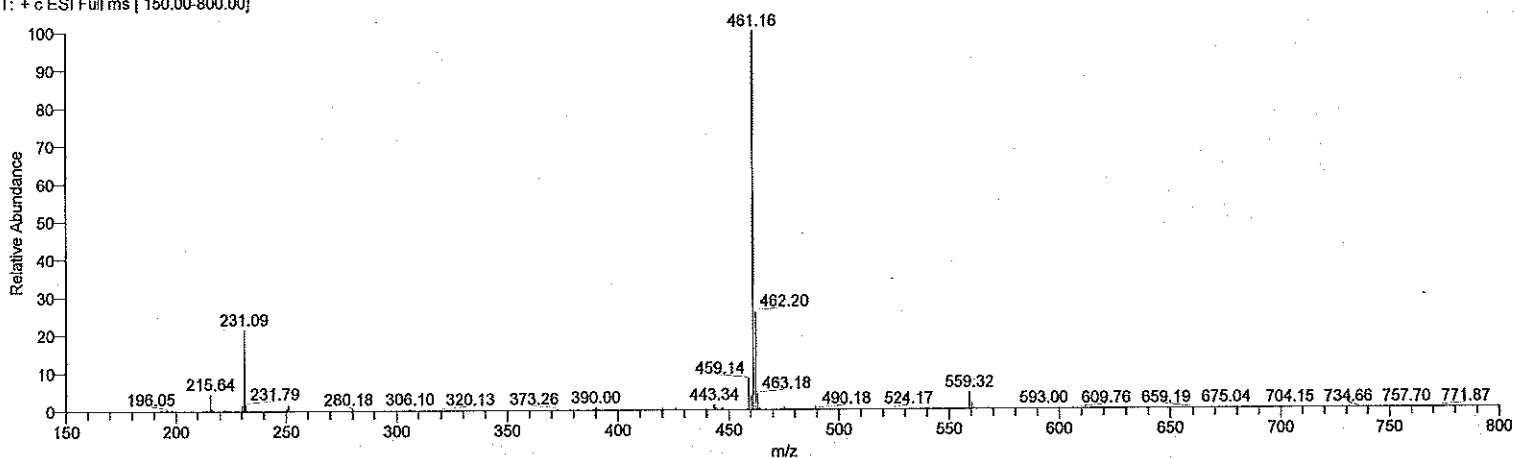

RT: 0.00 - 7.00

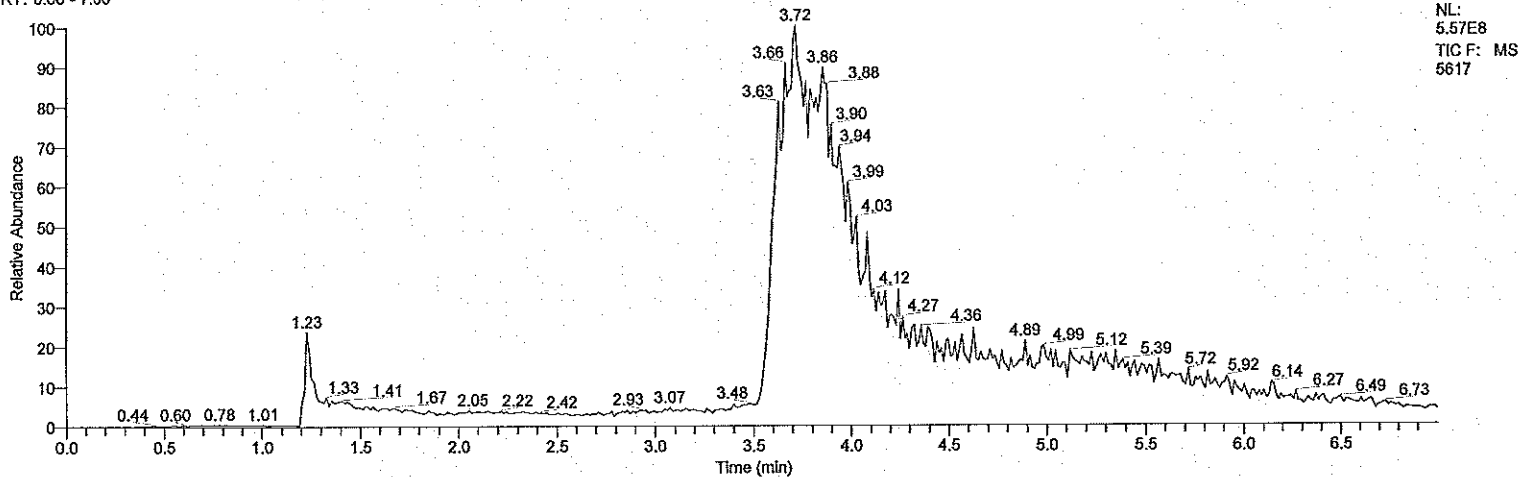

RT: 0.00 - 7.00

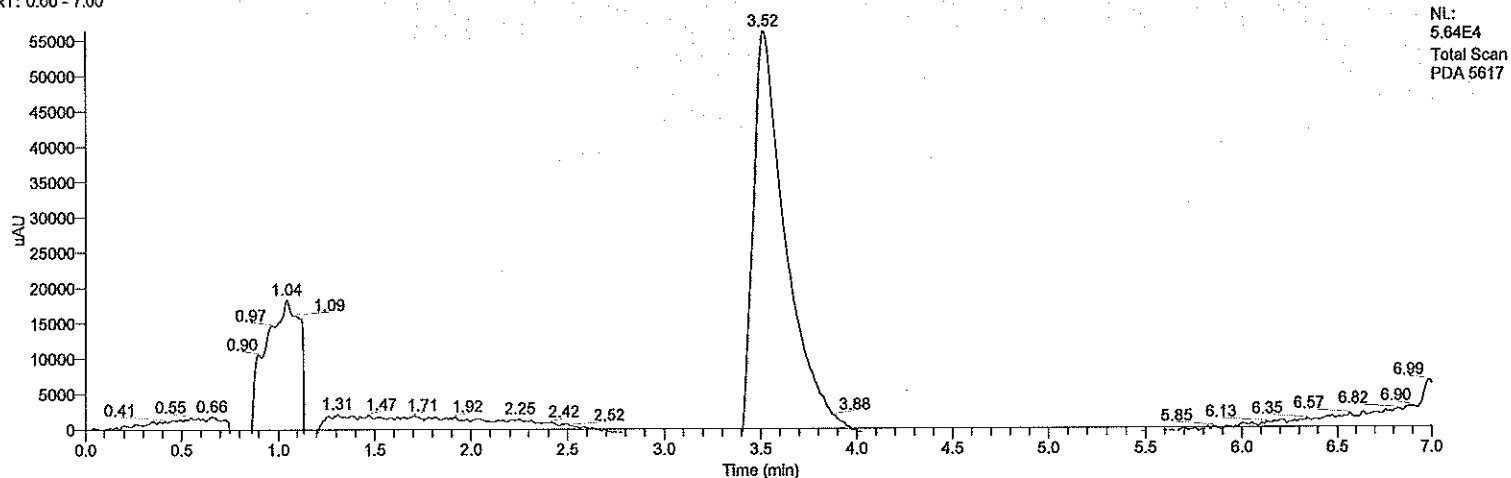

RT: 0.00 - 7.00

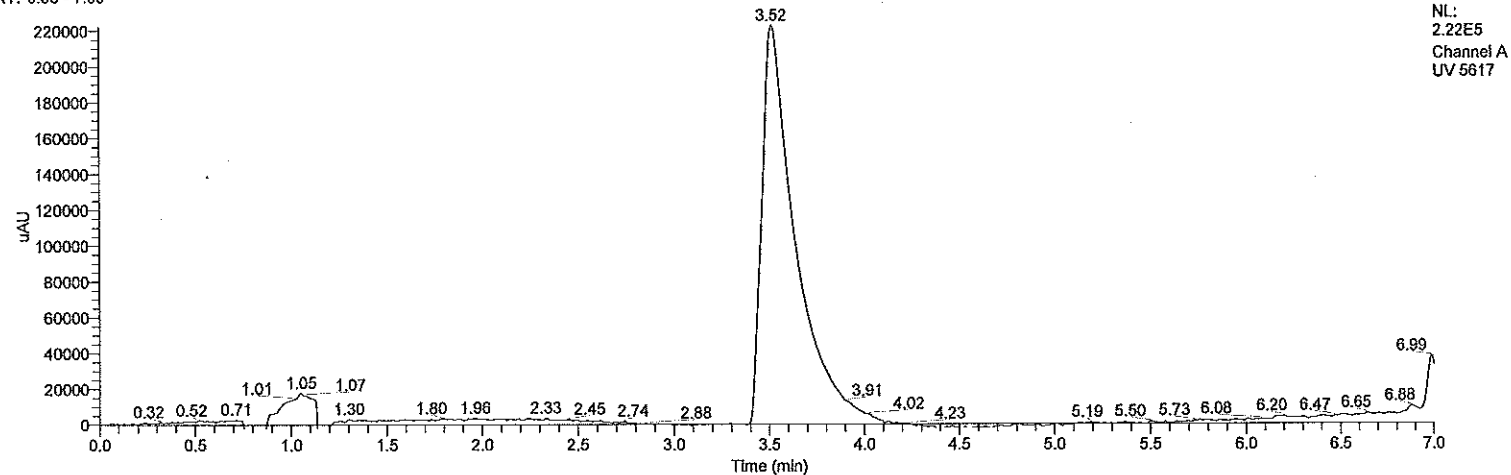

Compound 27 MW = 465.6

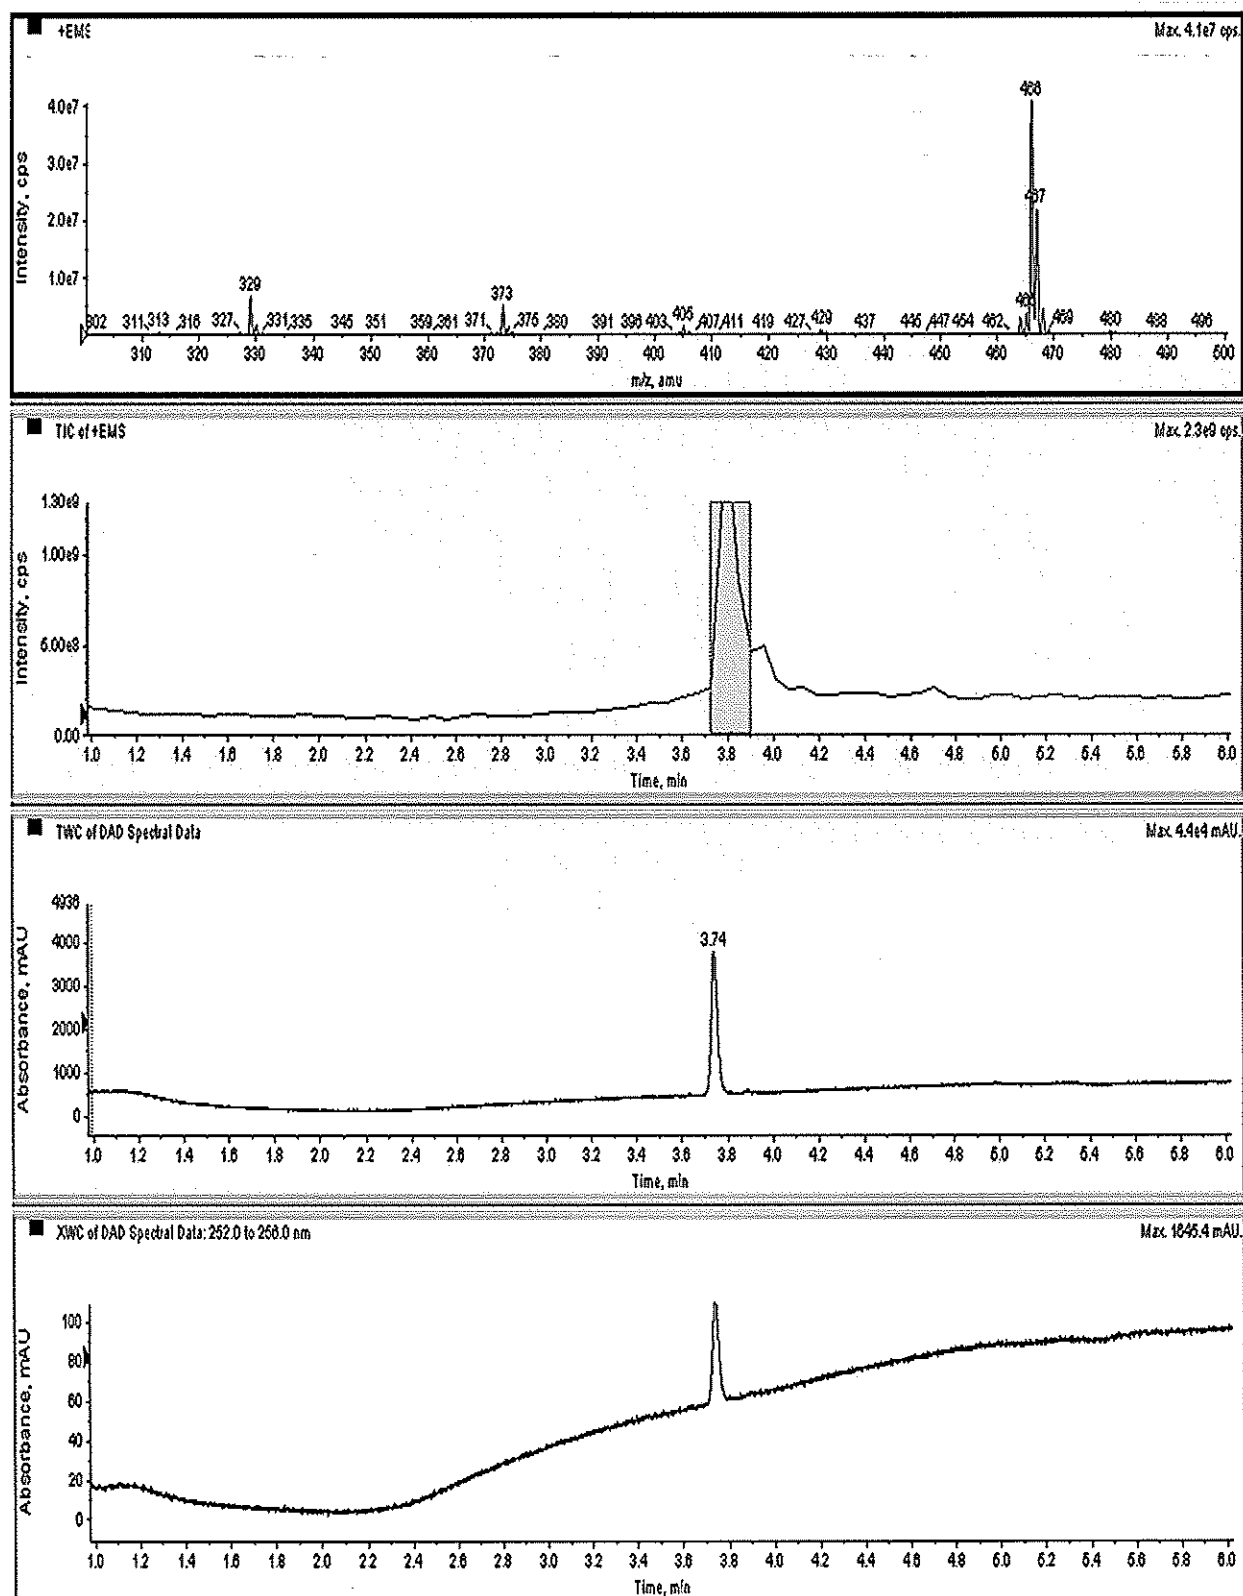

Compound 28 MW = 479.6

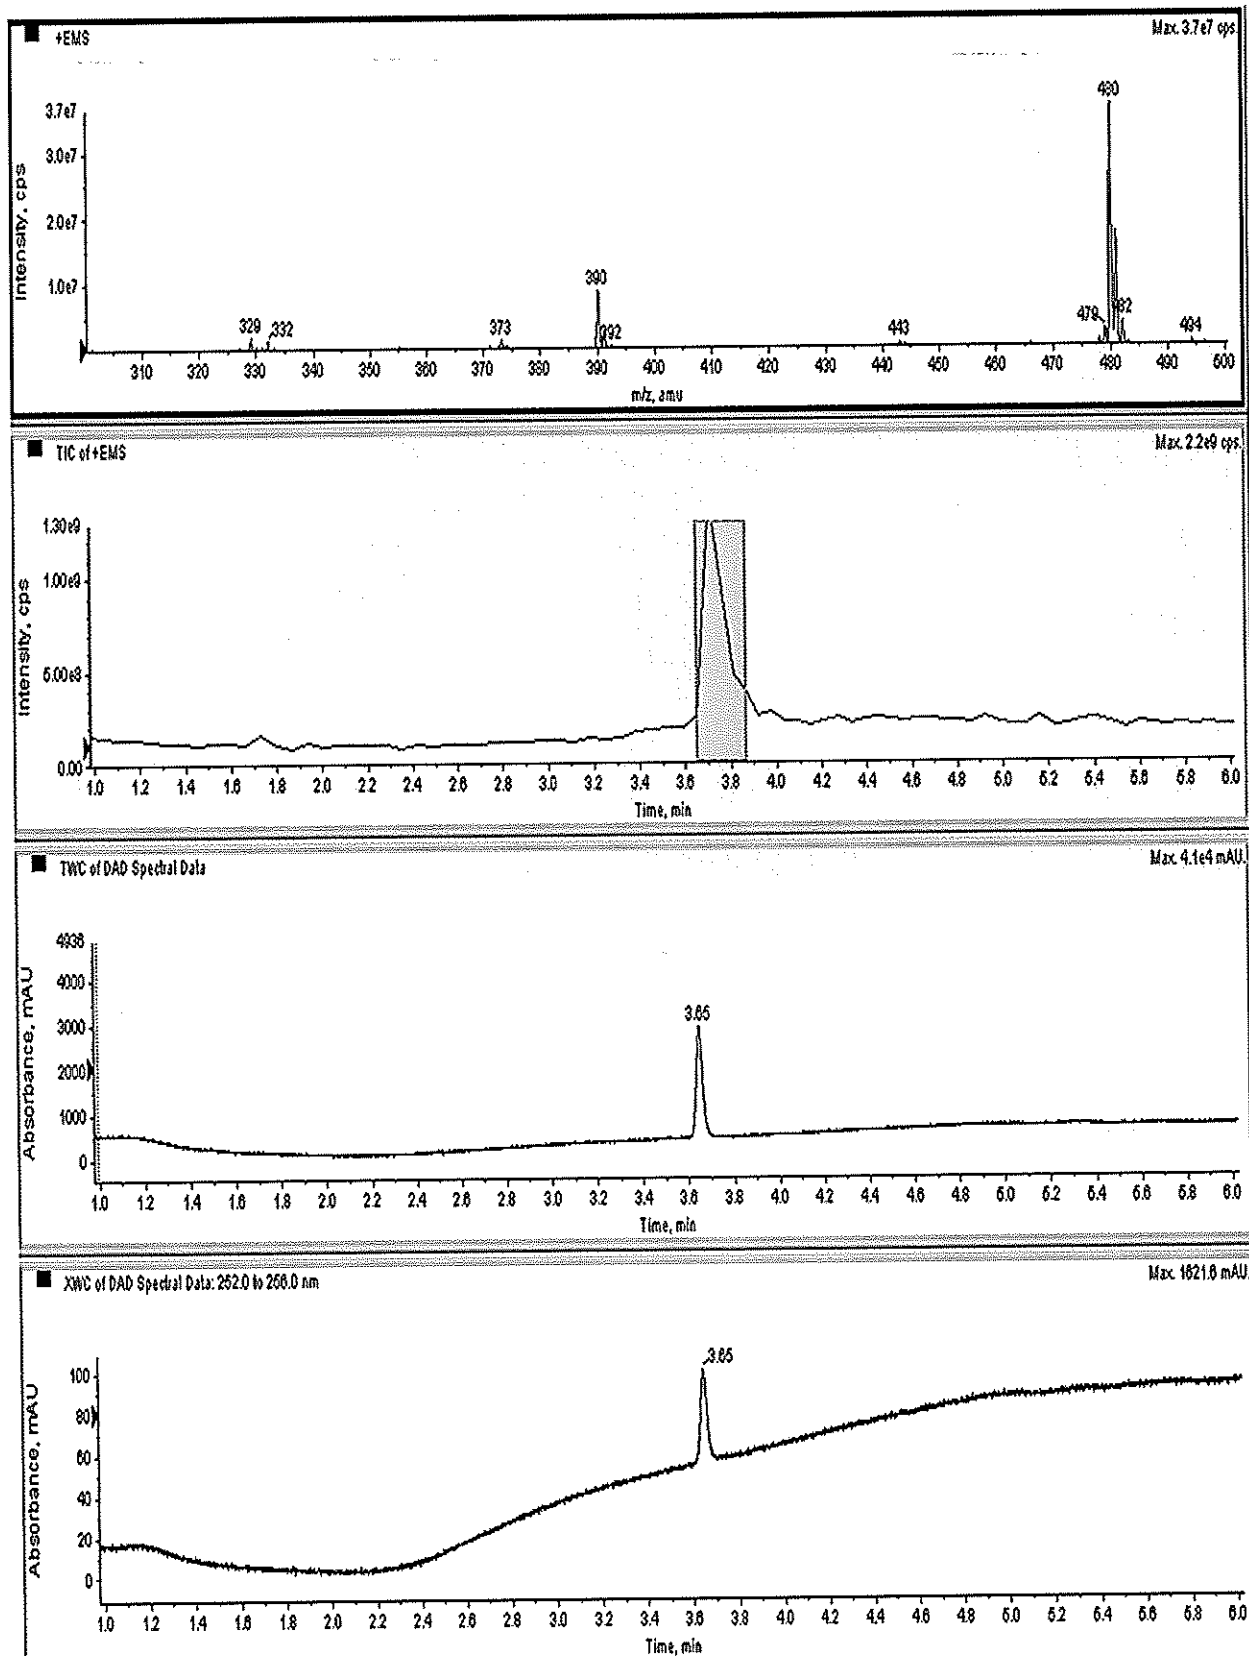

Compound 29

yssl-78-6 #324 RT: 4.24 AV: 1 NL: 4.75E7  
T: + c ESI Full ms [150.00-800.00]

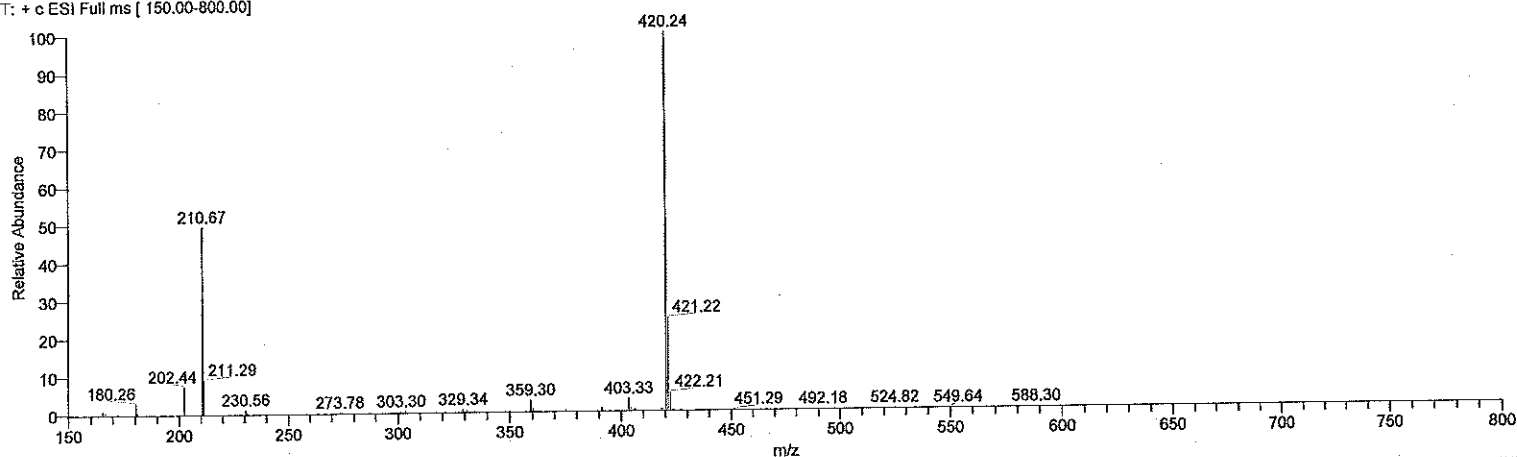

RT: 0.00 - 7.00

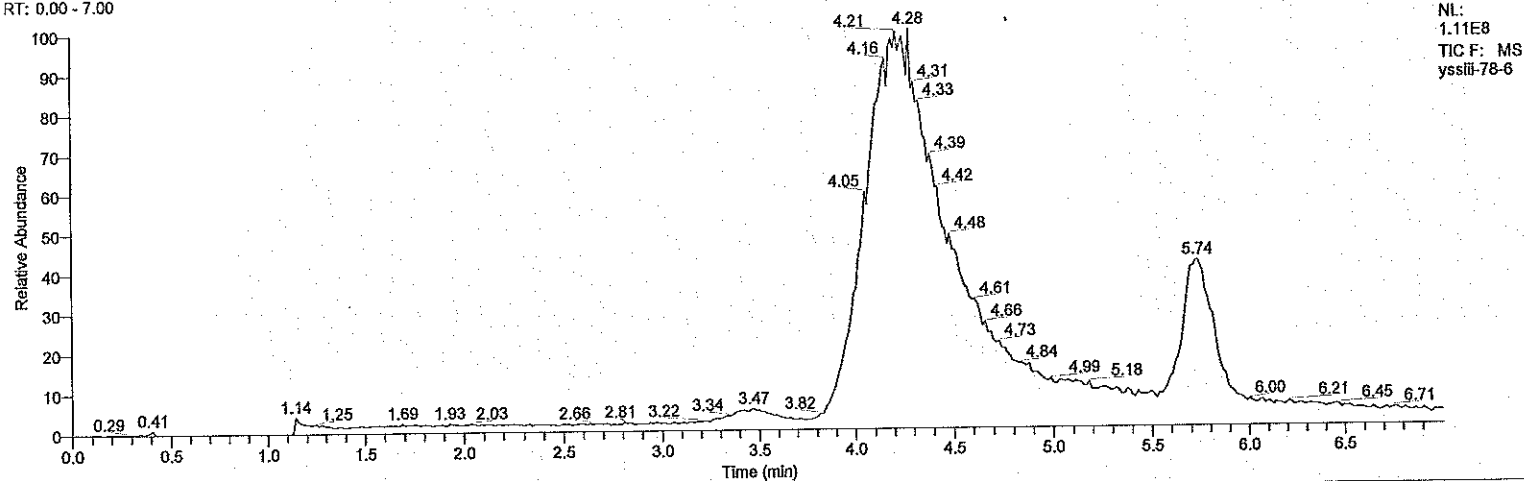

NL:  
1.11E8  
TIC F: MS  
yssl-78-6

RT: 0.00 - 7.00

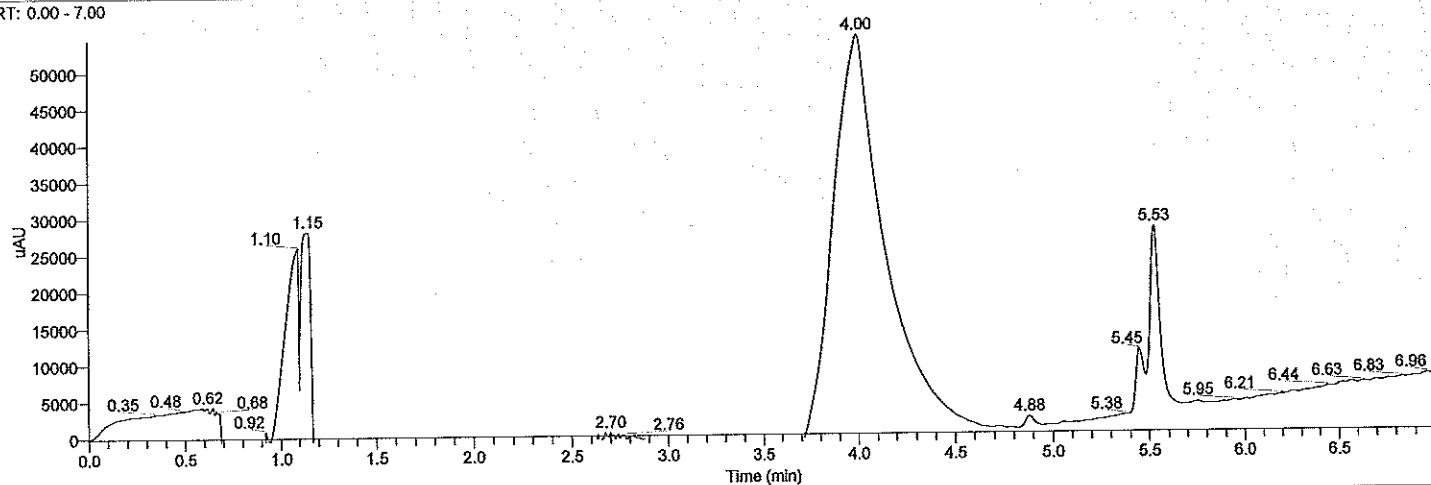

NL:  
5.44E4  
Total Scan  
PDA  
yssl-78-6

RT: 0.00 - 6.97

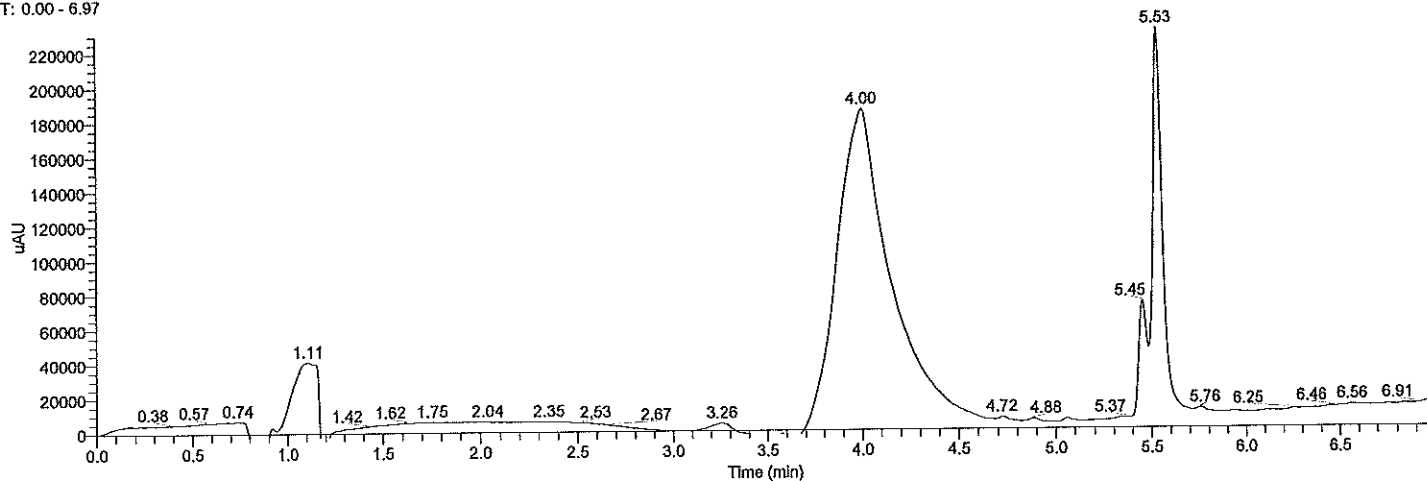

NL:  
2.30E5  
Channel A  
UV  
yssl-78-6

Compound 30

MKVIII42-1\_080229172058 #304-343 RT: 4.03-4.48 AV: 40 NL: 7.43E7  
T: + c ESI Full ms [ 150.00-800.00]

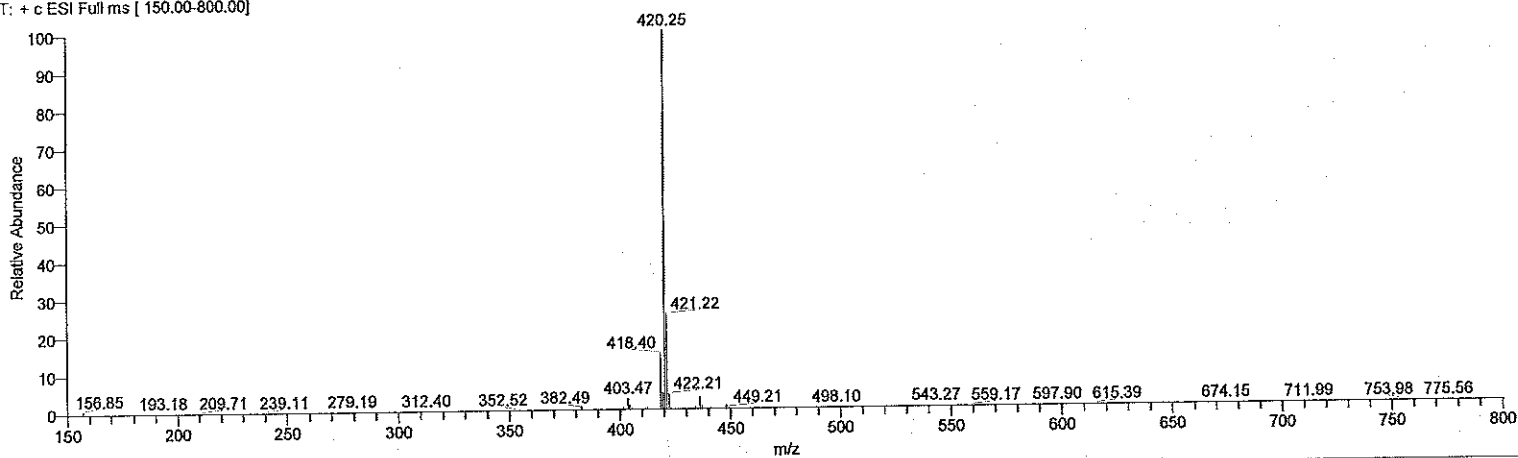

RT: 0.00 - 7.00

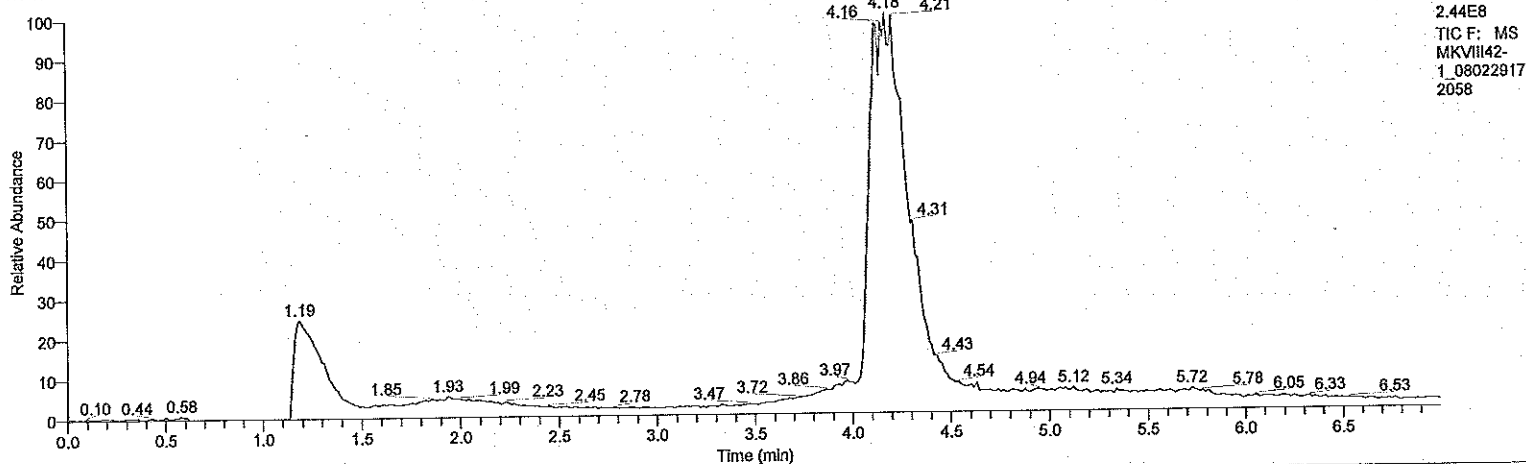

RT: 0.00 - 7.00

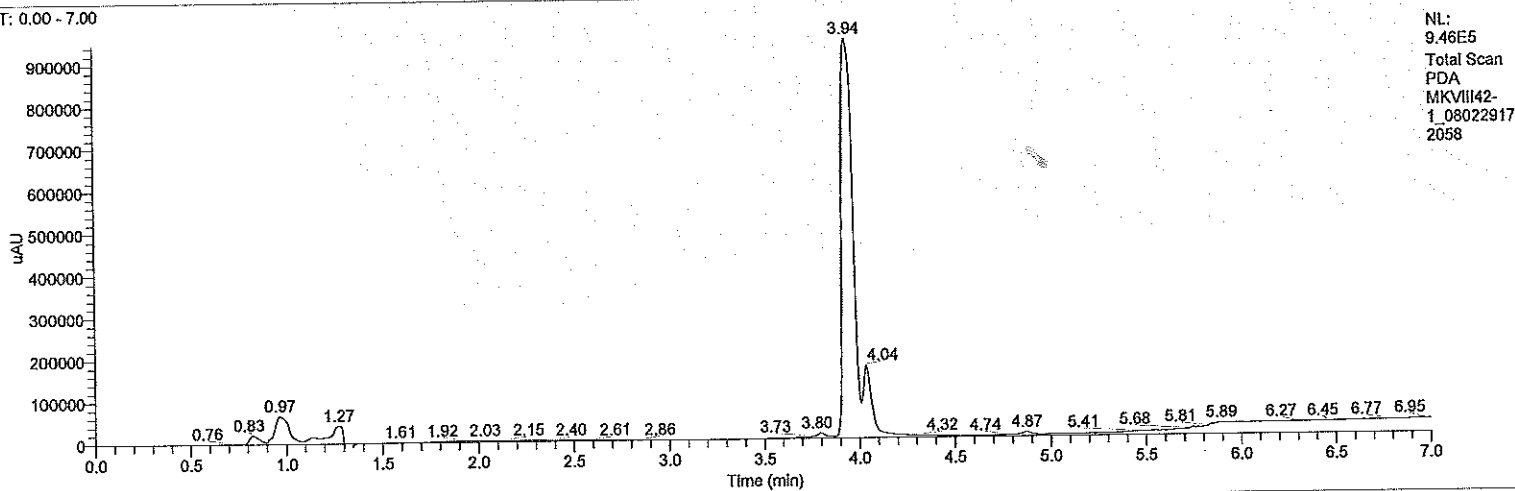

RT: 0.00 - 7.00

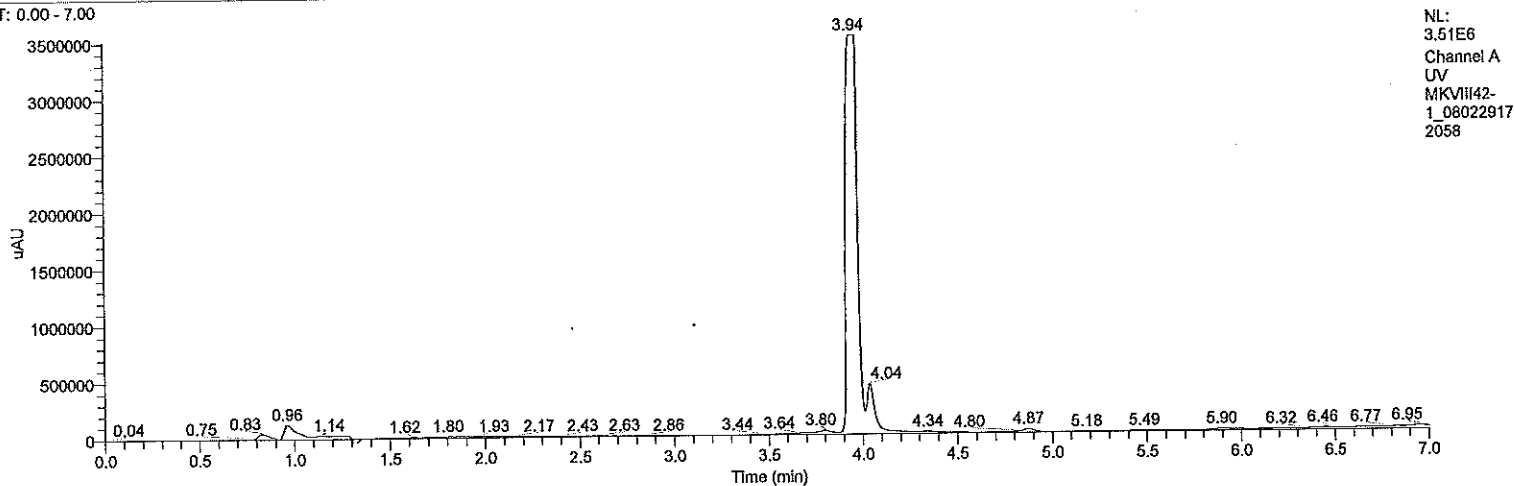

Compound 31

MKVIII44-1 #294-320 RT: 3.85-4.18 AV: 27 NL: 2.45E7  
T: + e ESI Full ms [ 150.00-800.00]

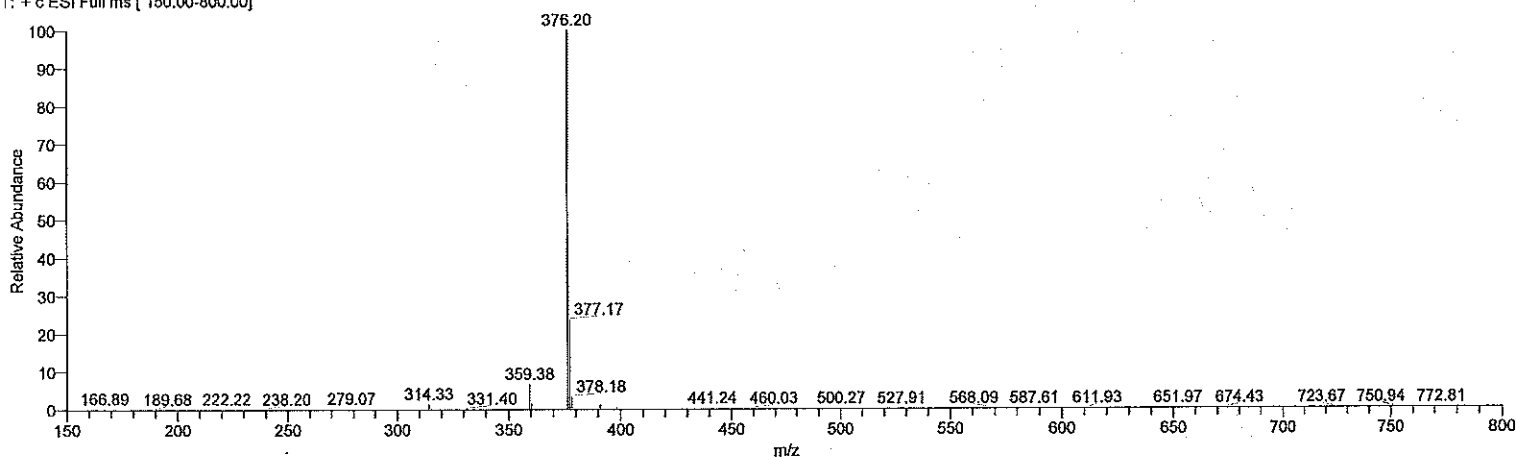

RT: 0.00 - 6.99

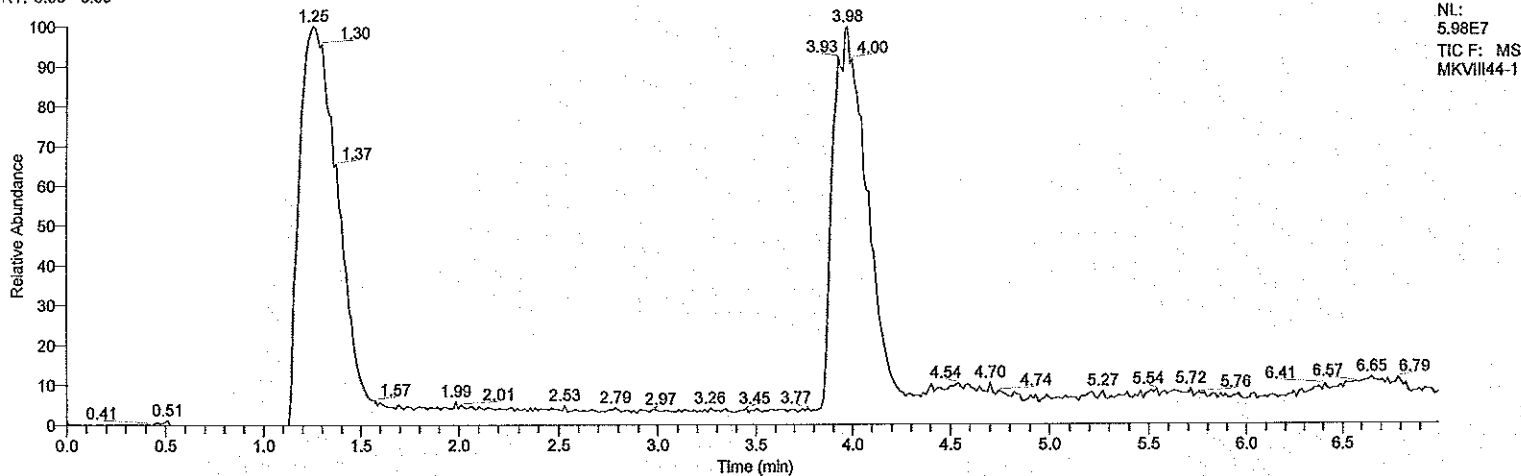

RT: 0.00 - 7.00

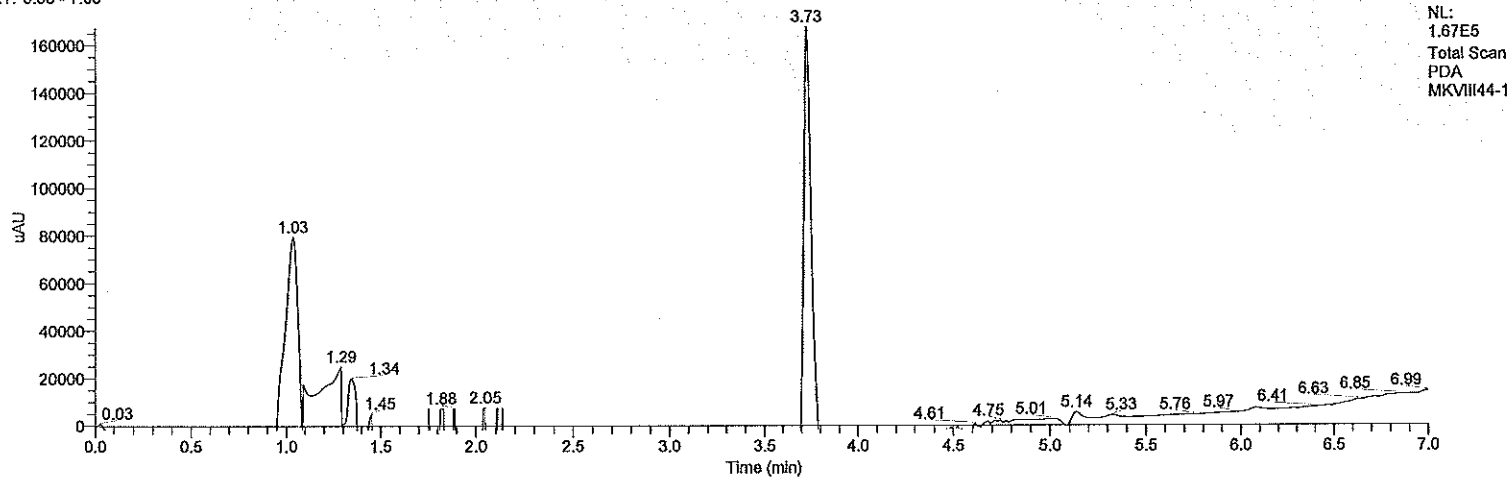

RT: 0.00 - 7.00

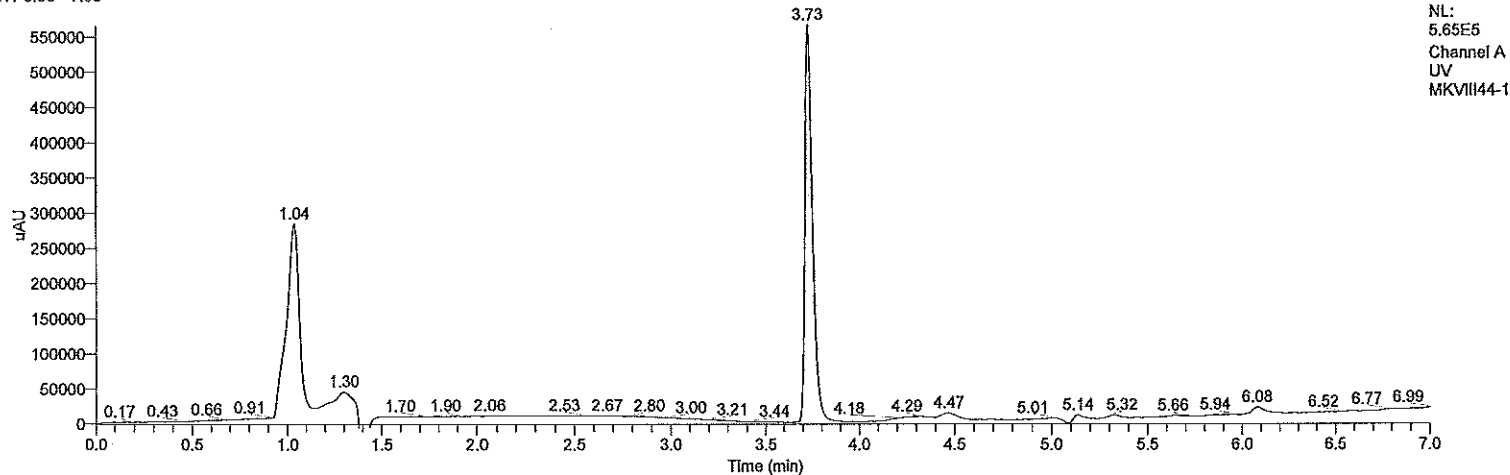



Compound 32

4906 #270-314 RT: 3.60-4.09 AV: 45 NL: 2.11E8  
T: + c ESI Full ms [ 150.00-800.00]

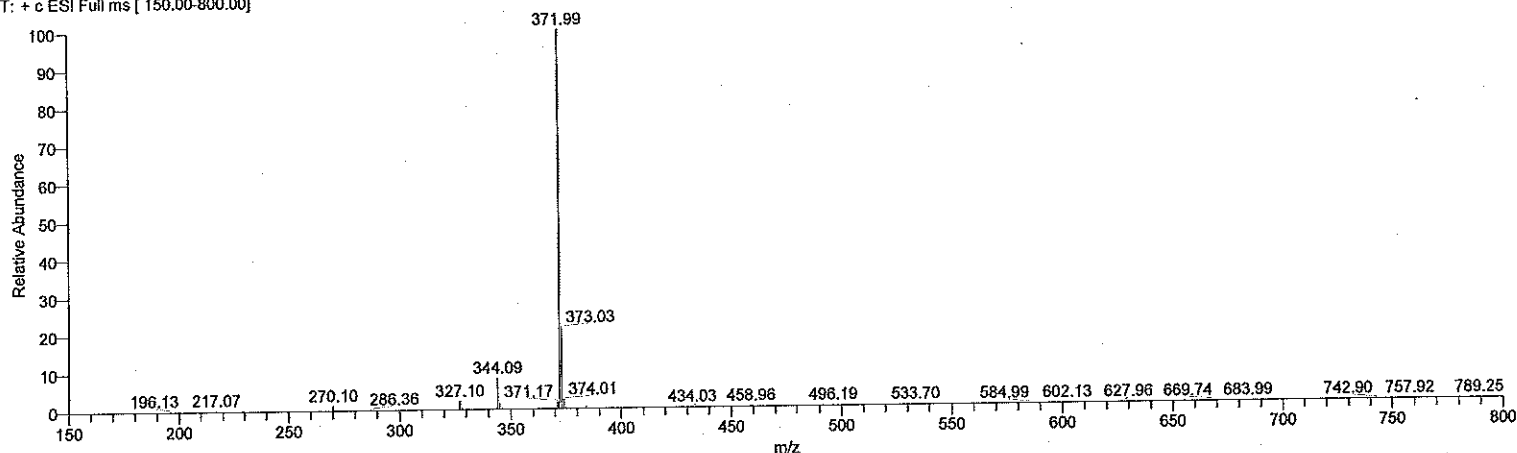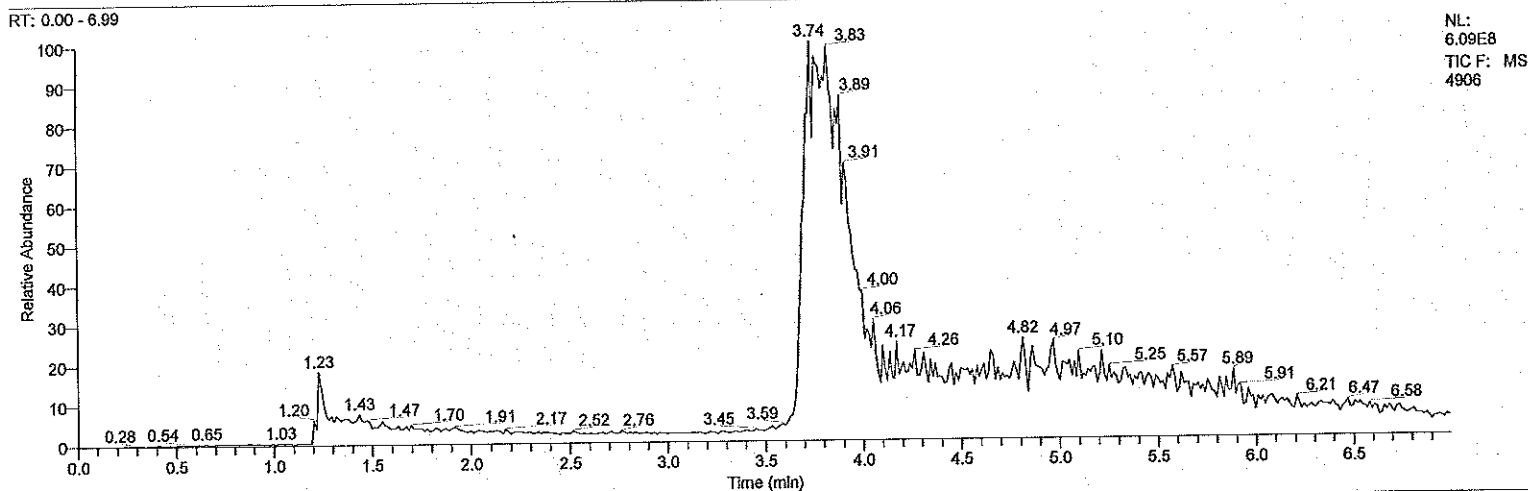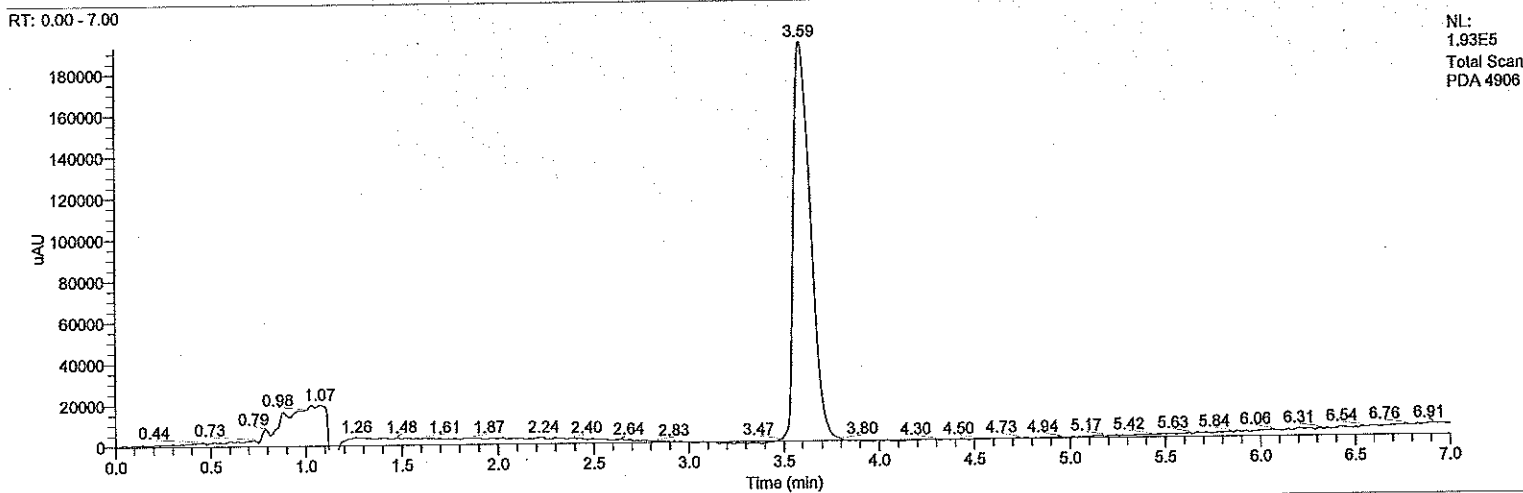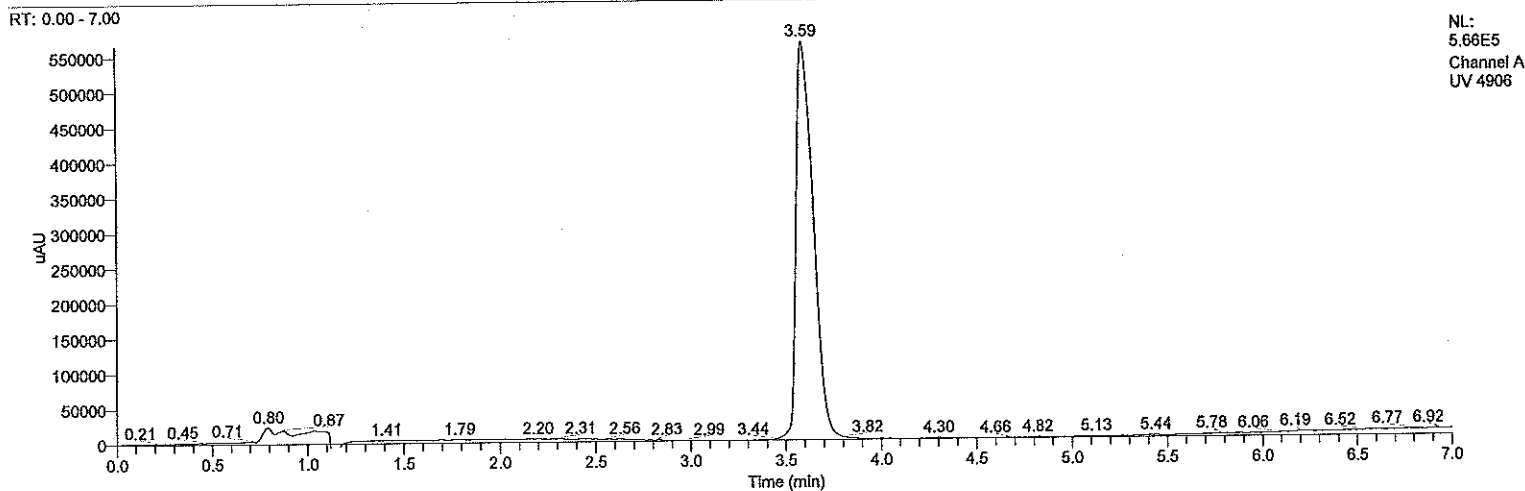

Compound 33

4907 #274-308 RT: 3.62-4.00 AV: 35 NL: 1.95E8  
T: + c ESI Full ms [ 150.00-800.00]

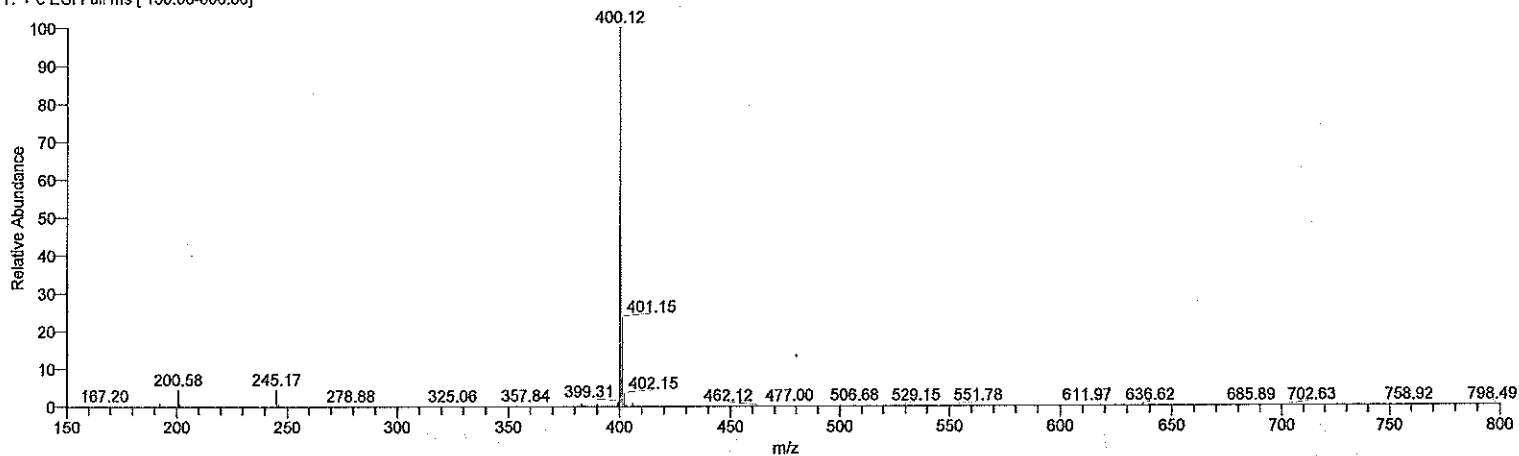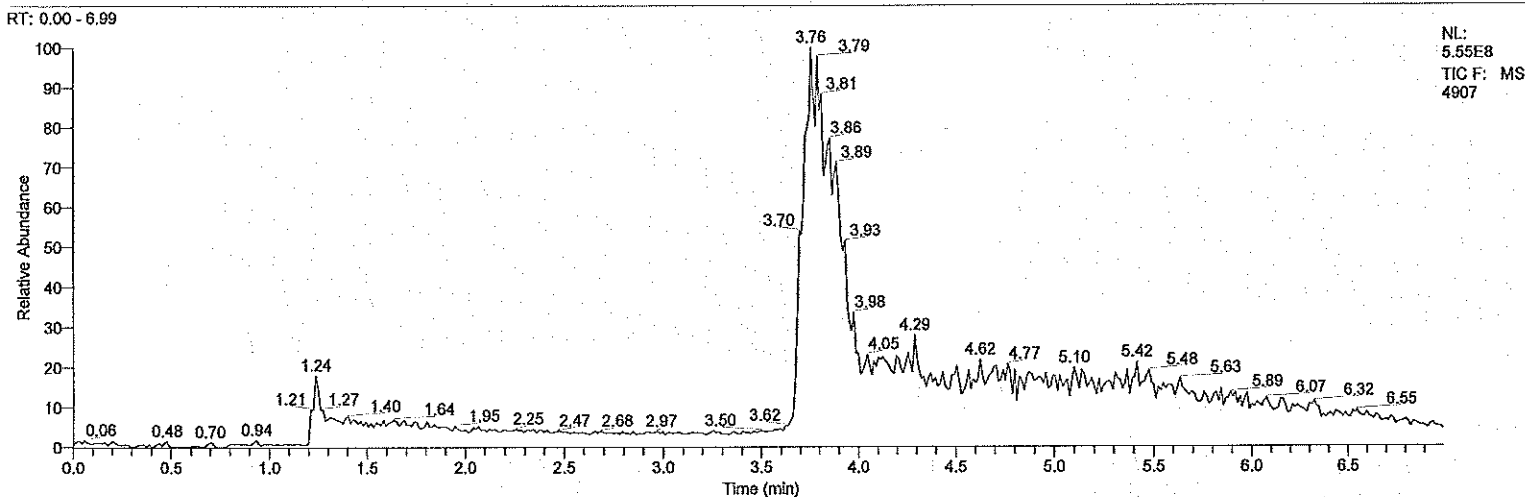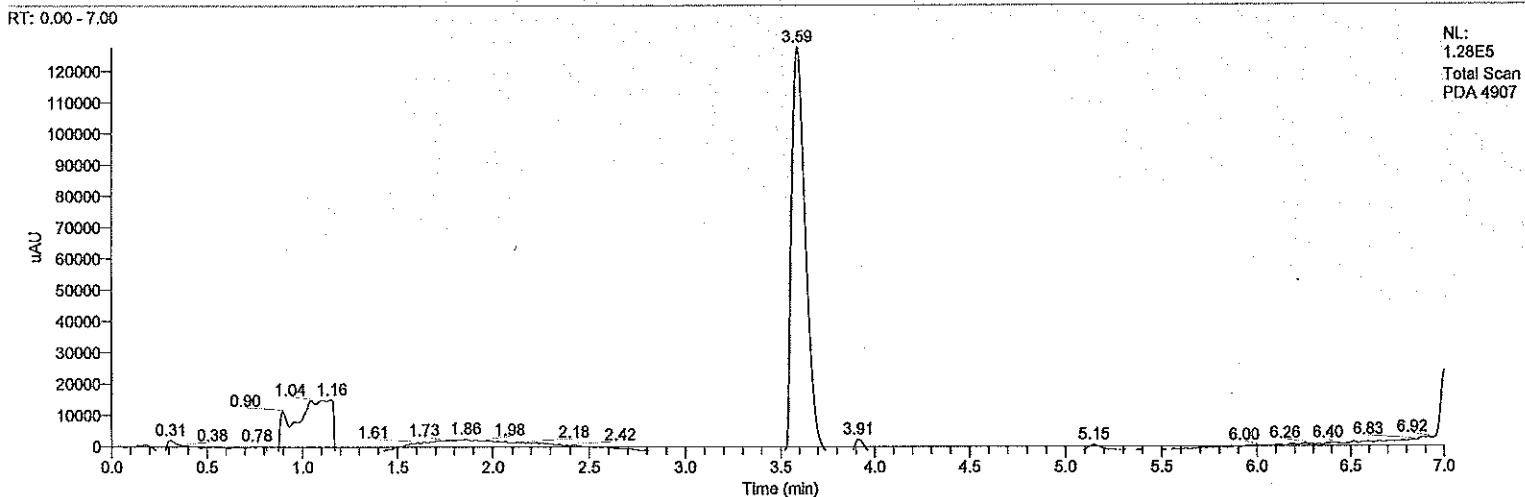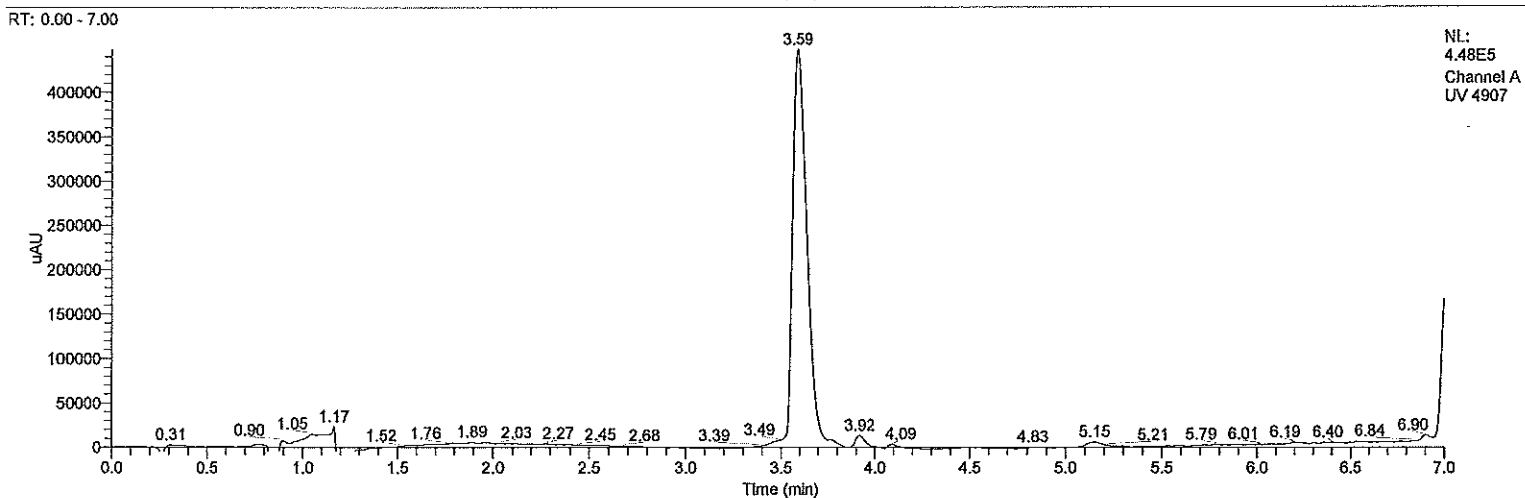

4941 #303-344 RT: 4.02-4.48 AV: 42 NL: 2.07E8  
T: + c ESI Full ms [ 150.00-800.00]

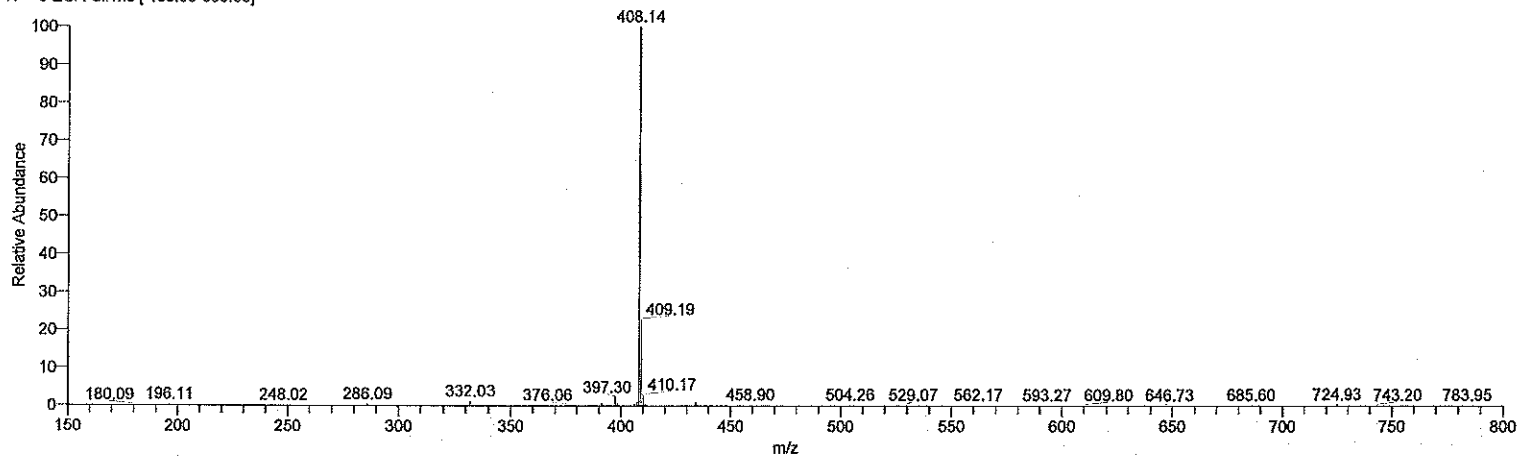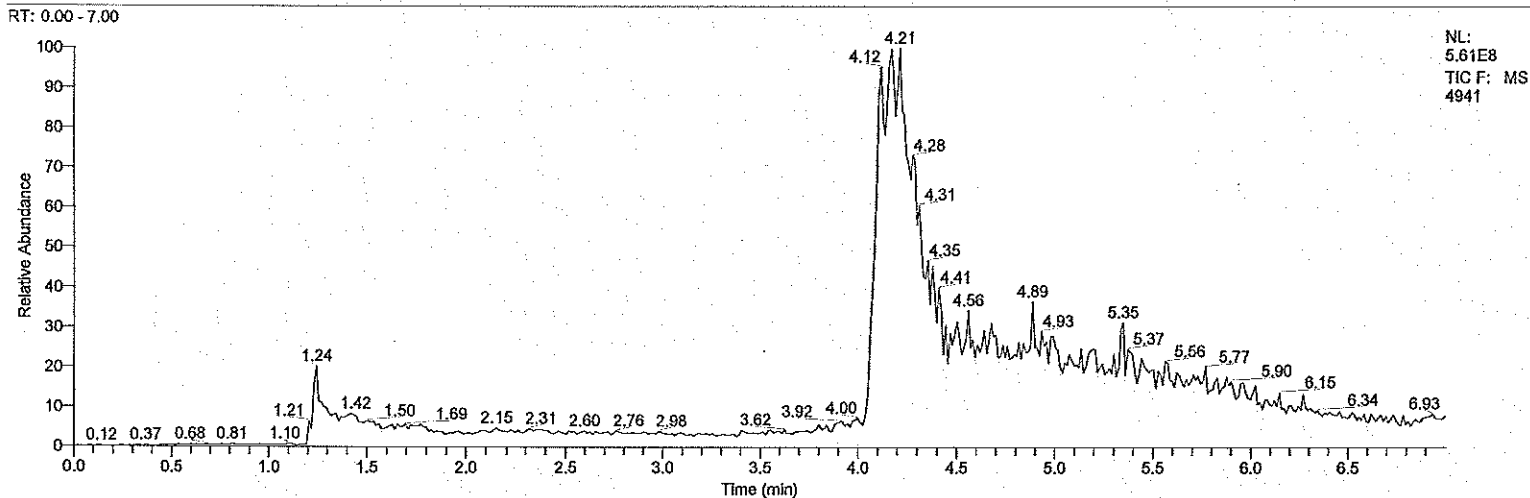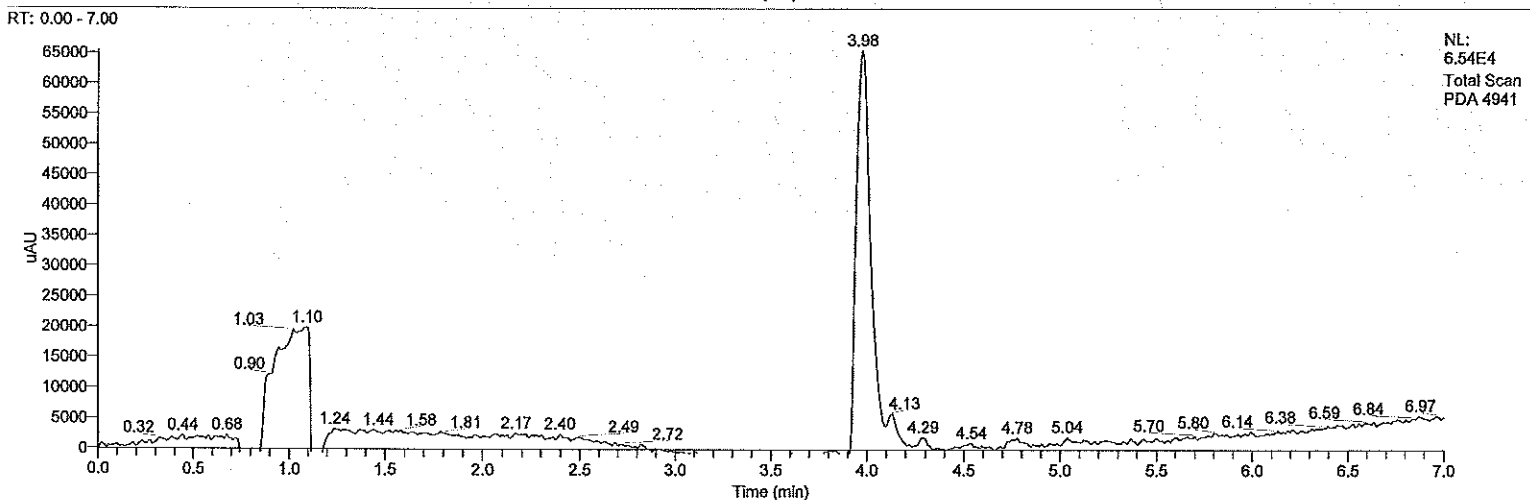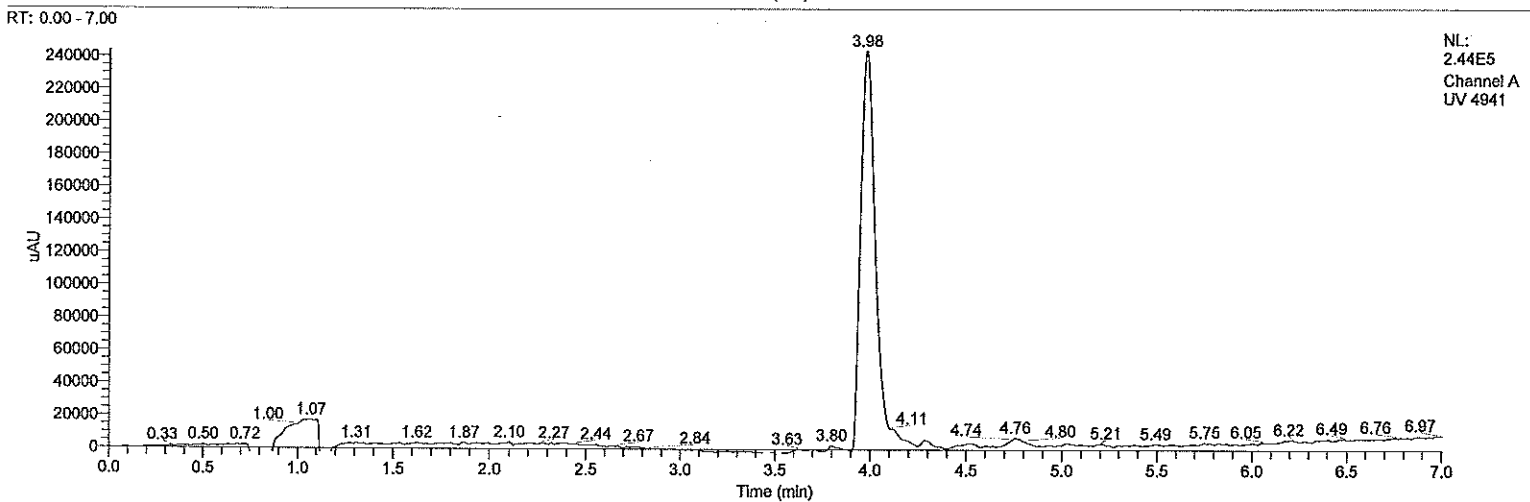

Compound 35 MW= 348.4

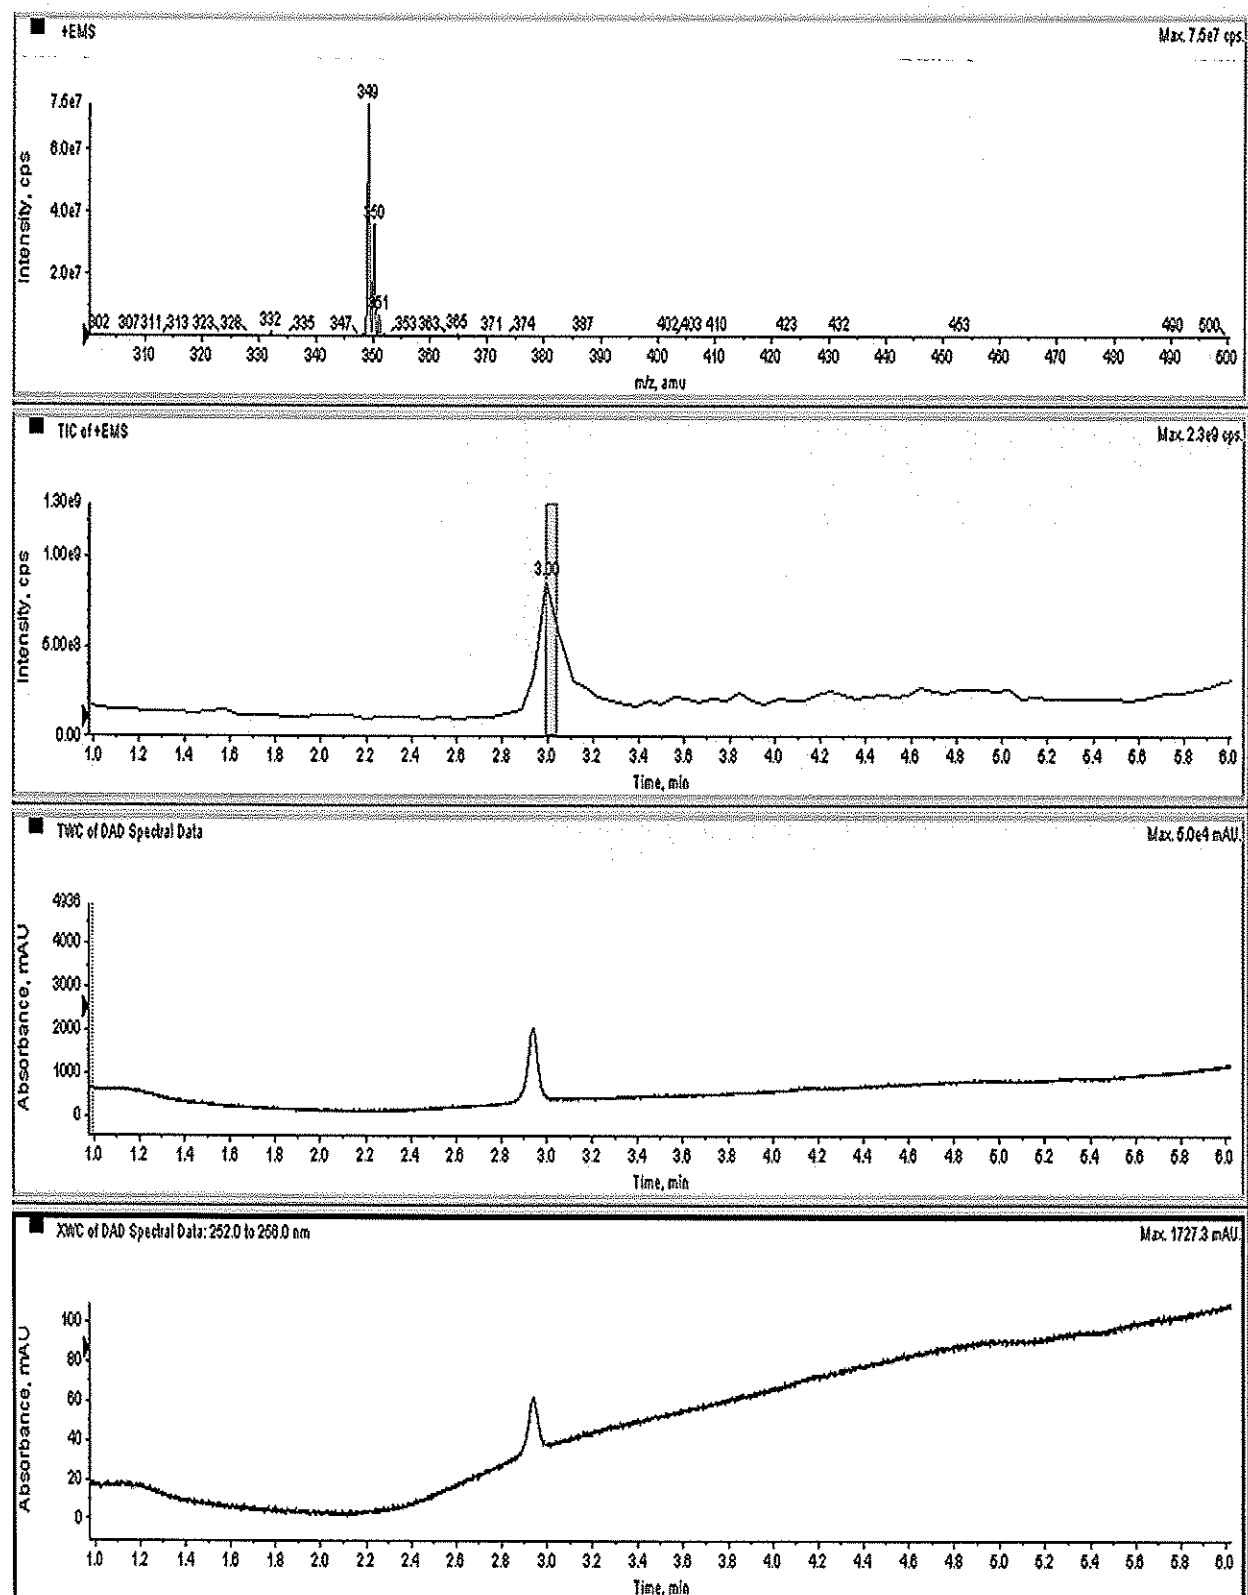

Compound 36 MW=354.4

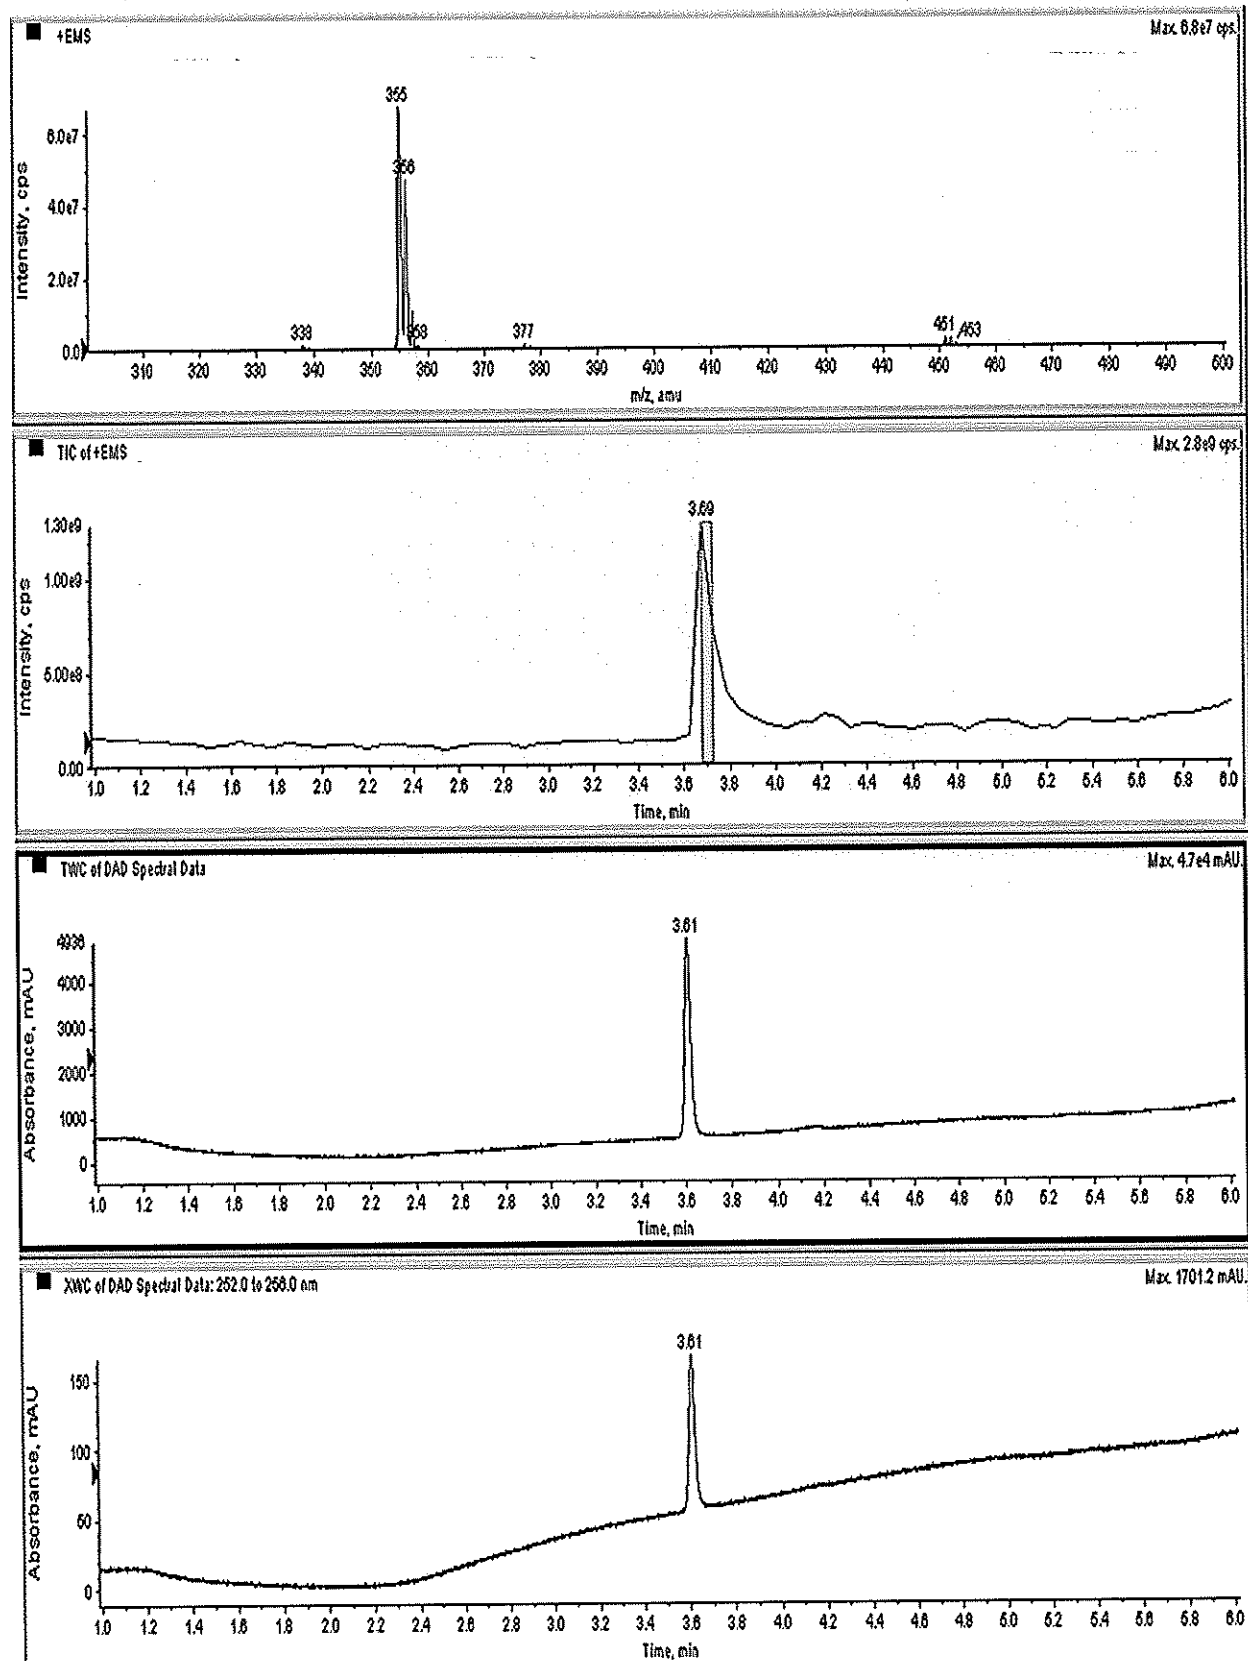

Compound 37

4994 #295-332 RT: 3.95-4.36 AV: 38 NL: 2.75E8  
T: + c ESI Full ms [ 150.00-800.00]

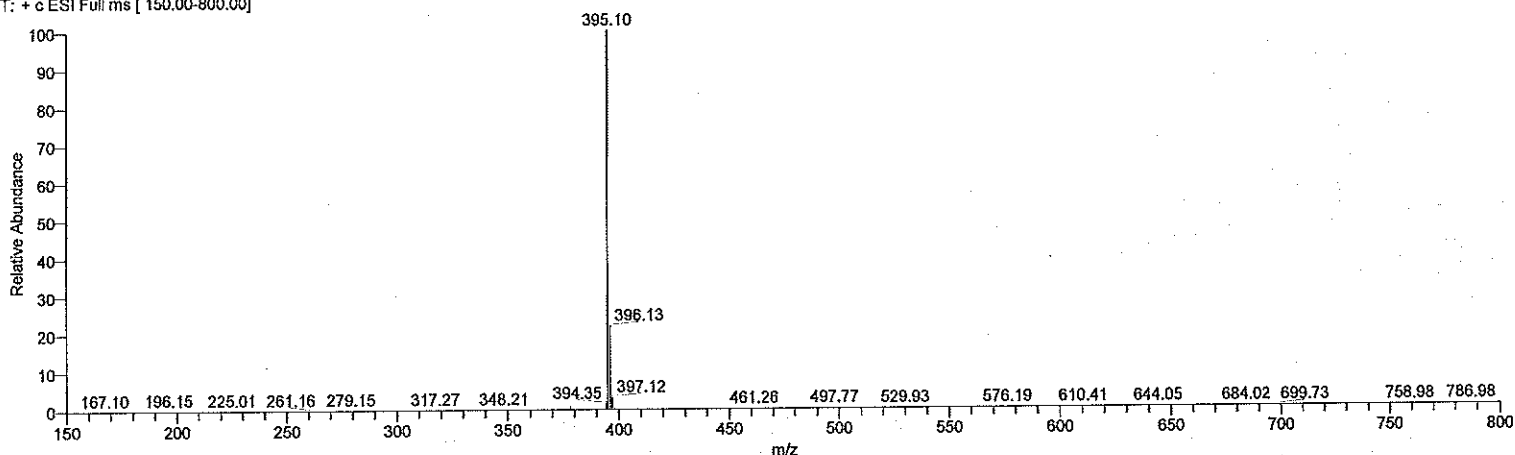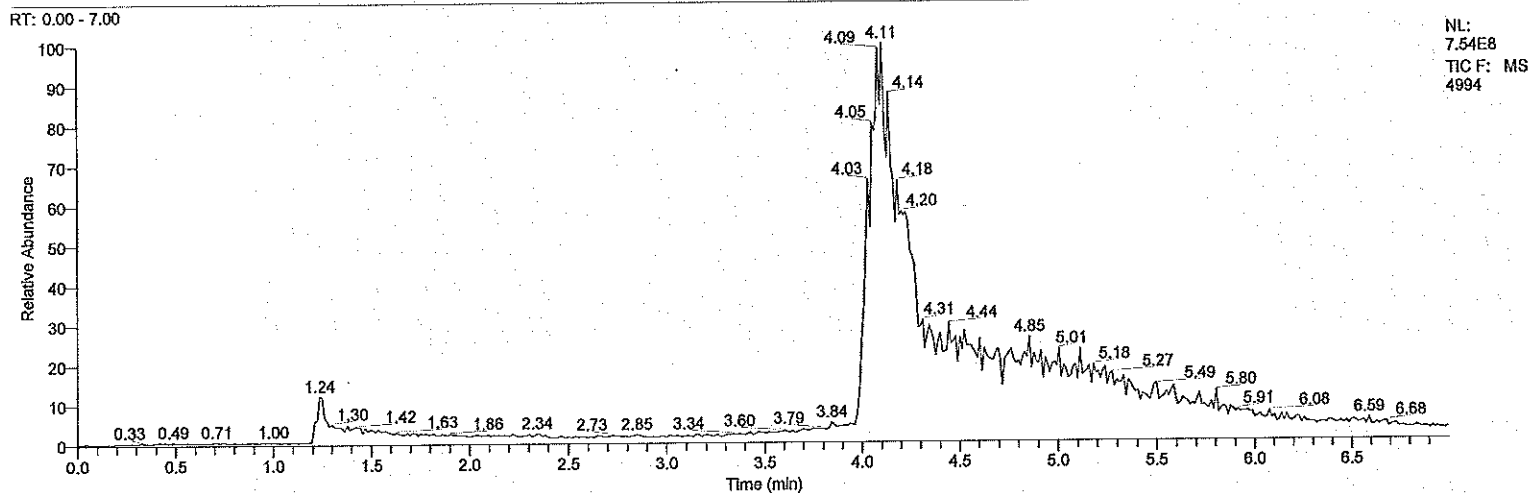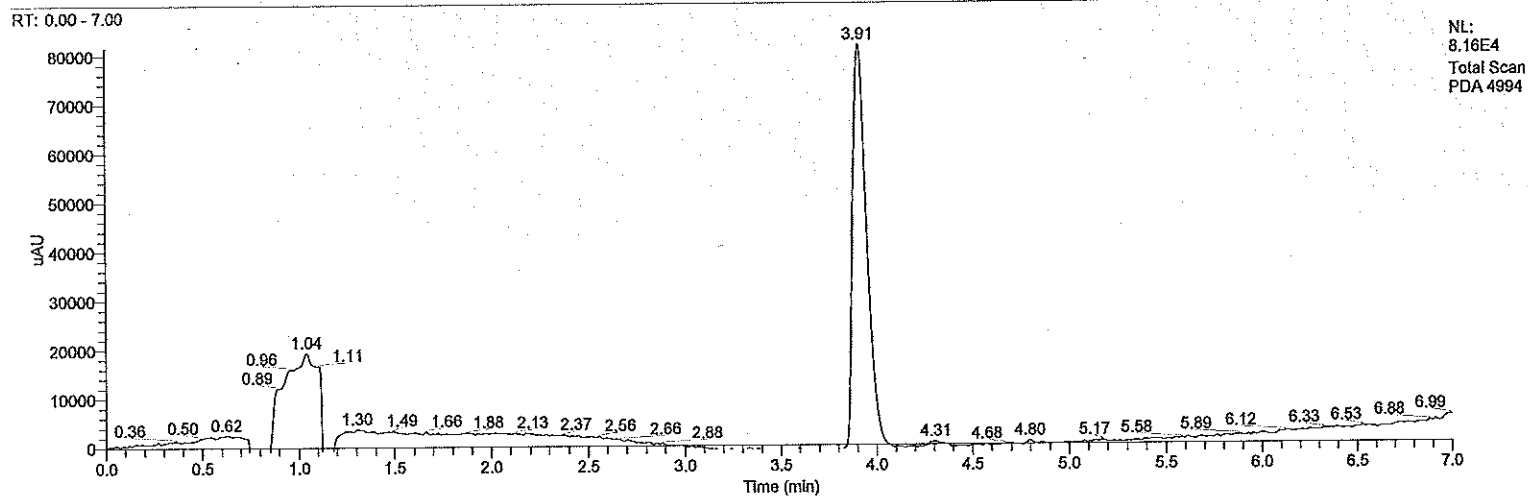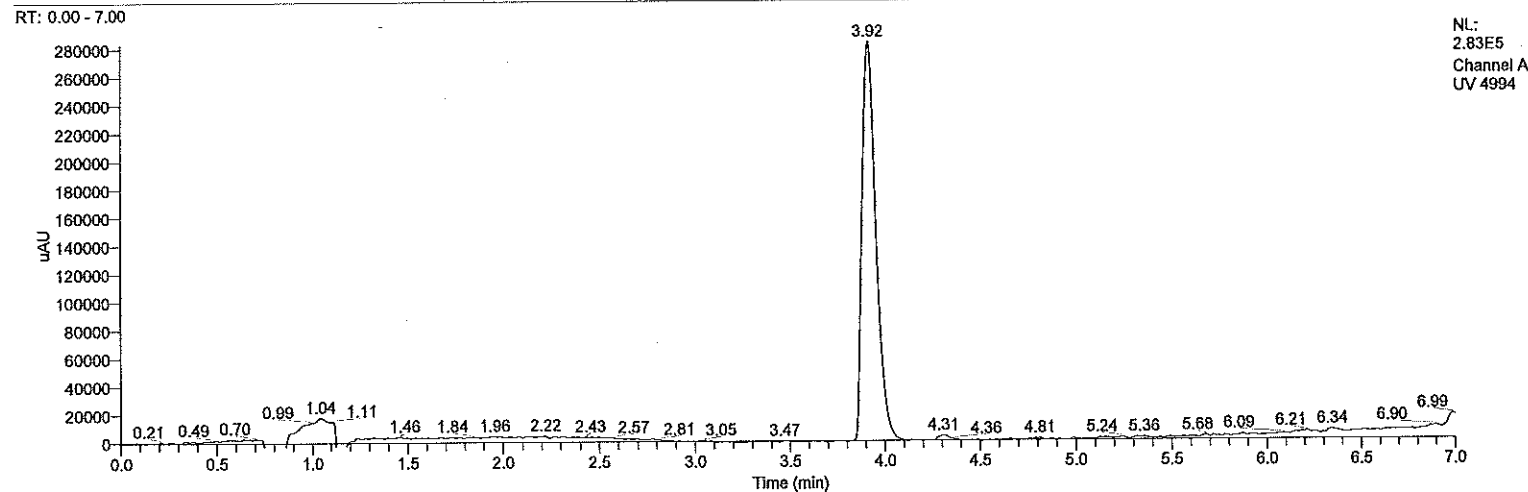

Compound 38 MW = 403.4

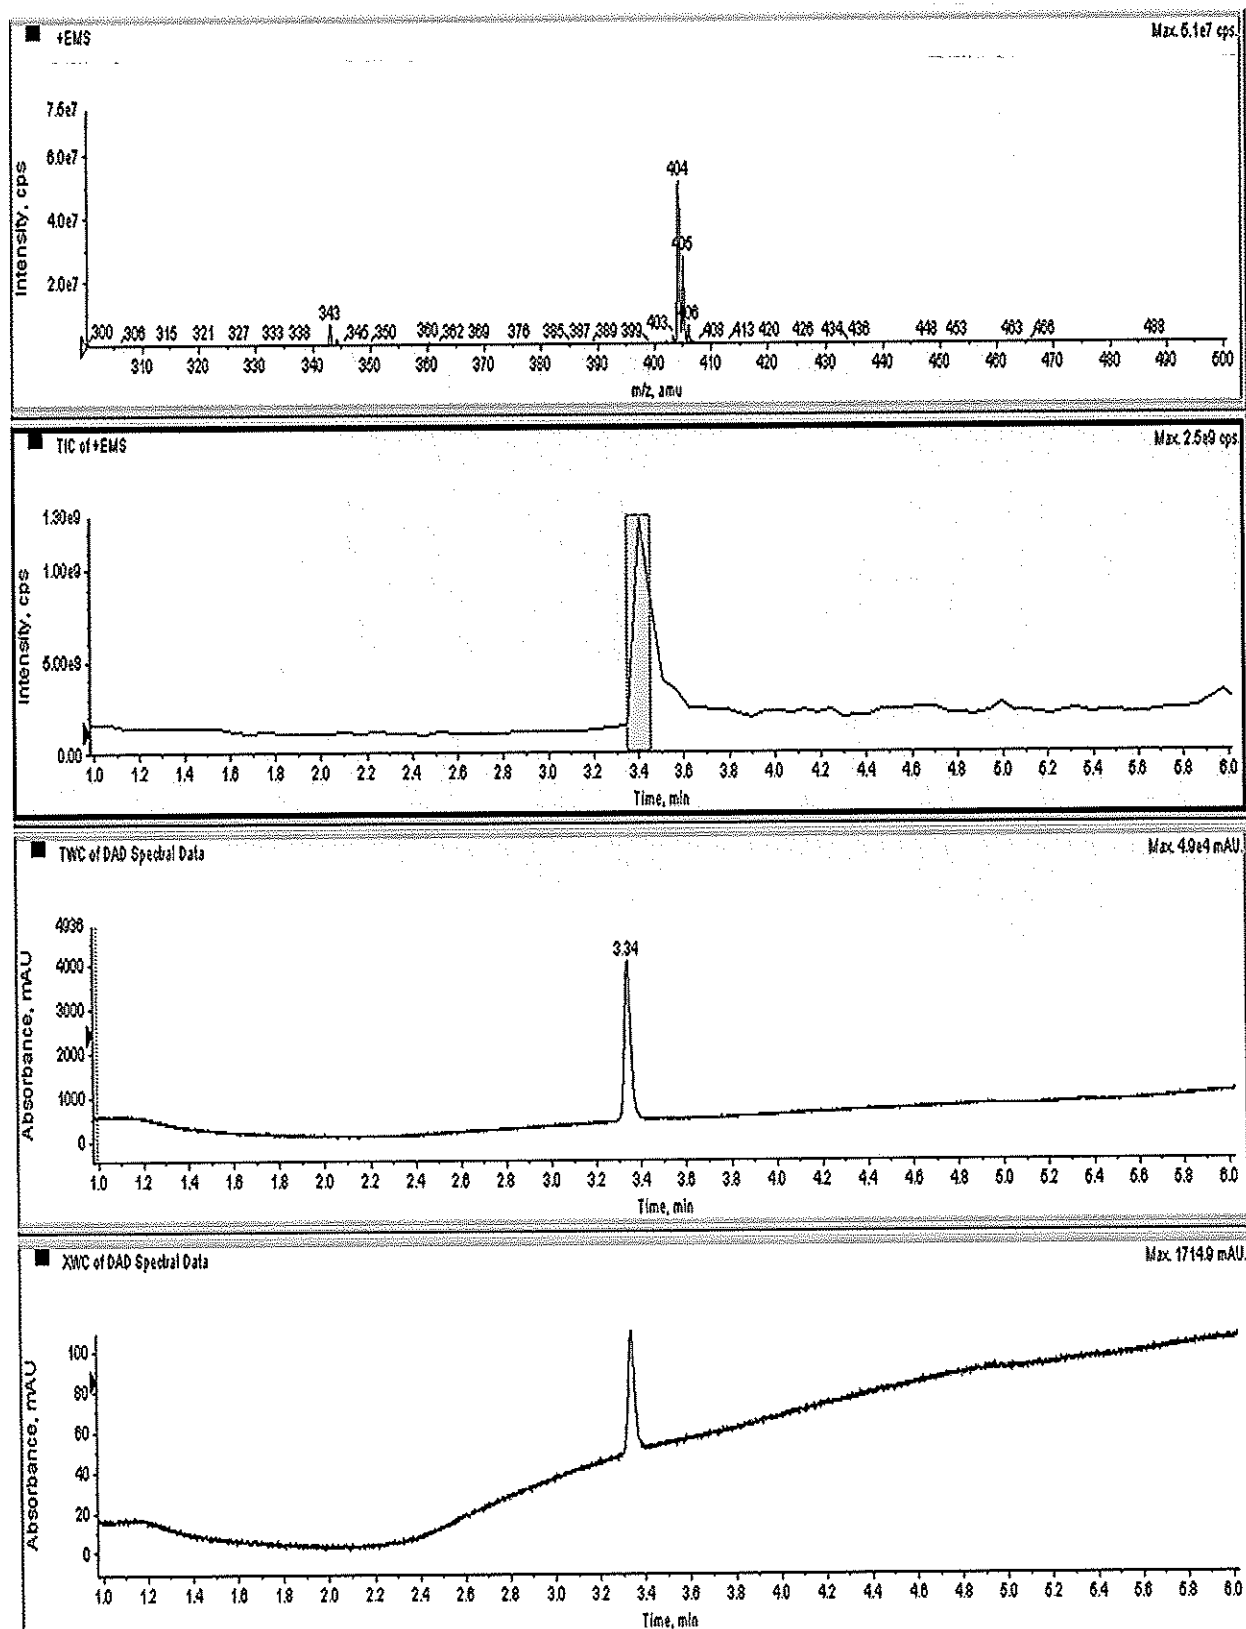

Compound 40

4819 #342-383 RT: 4.37-4.82 AV: 42 NL: 2.61E8  
T: + c ESI Full ms [ 150.00-800.00]

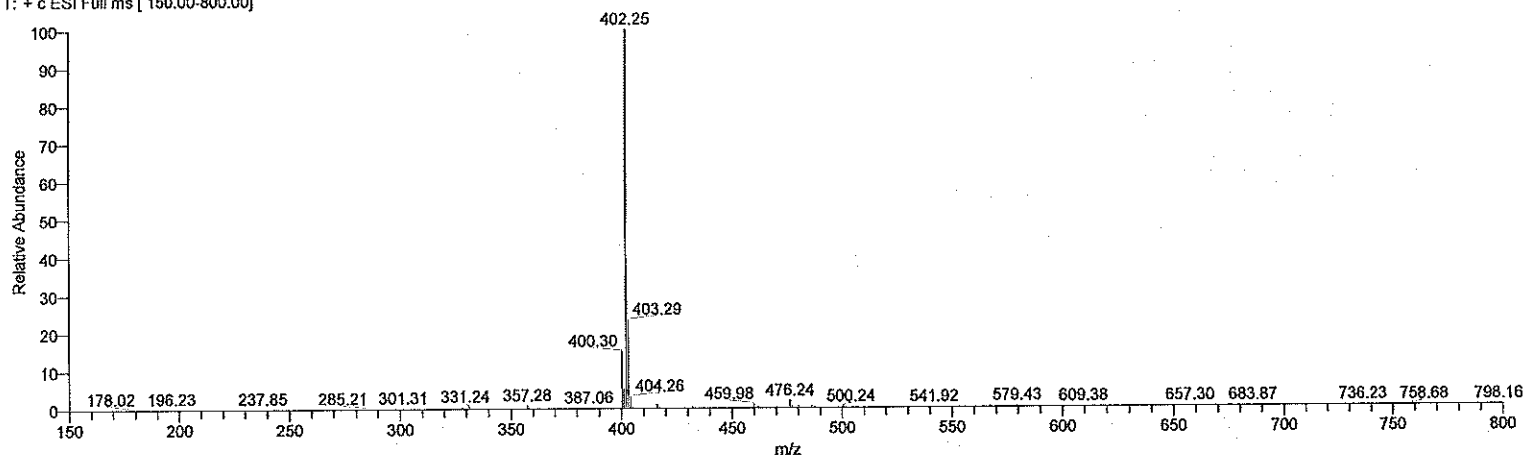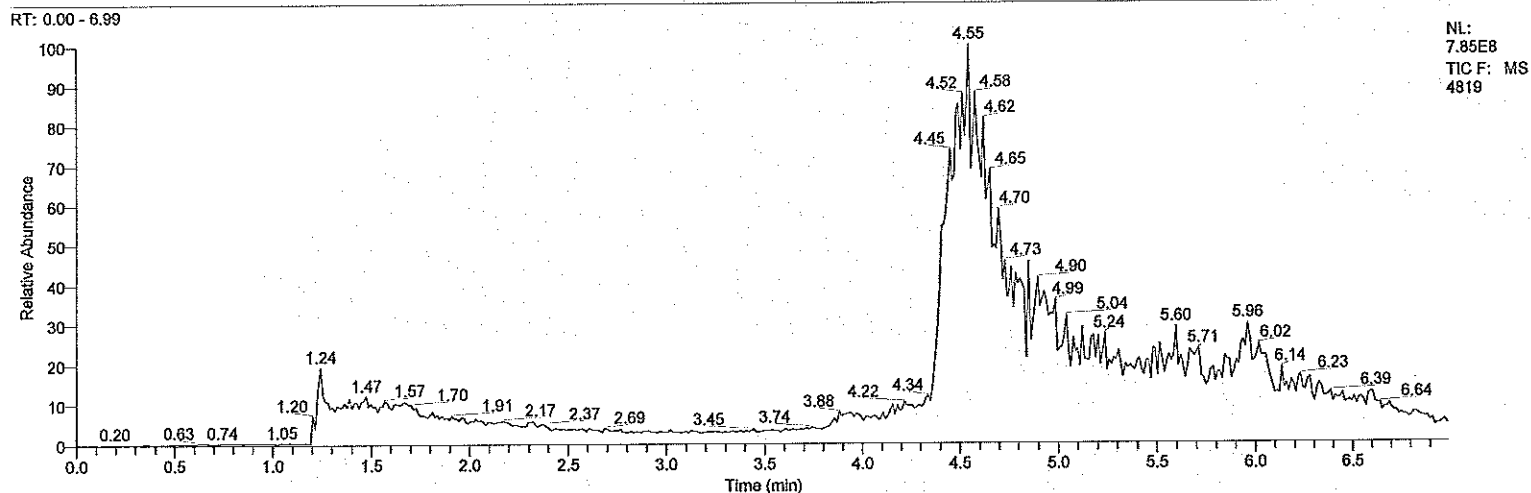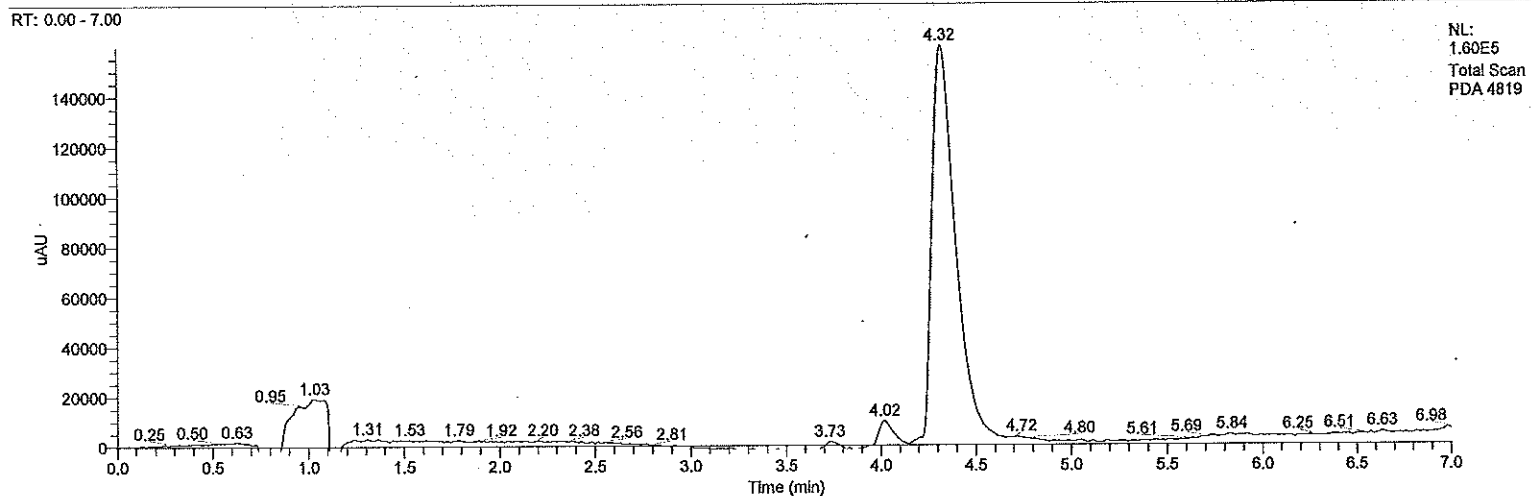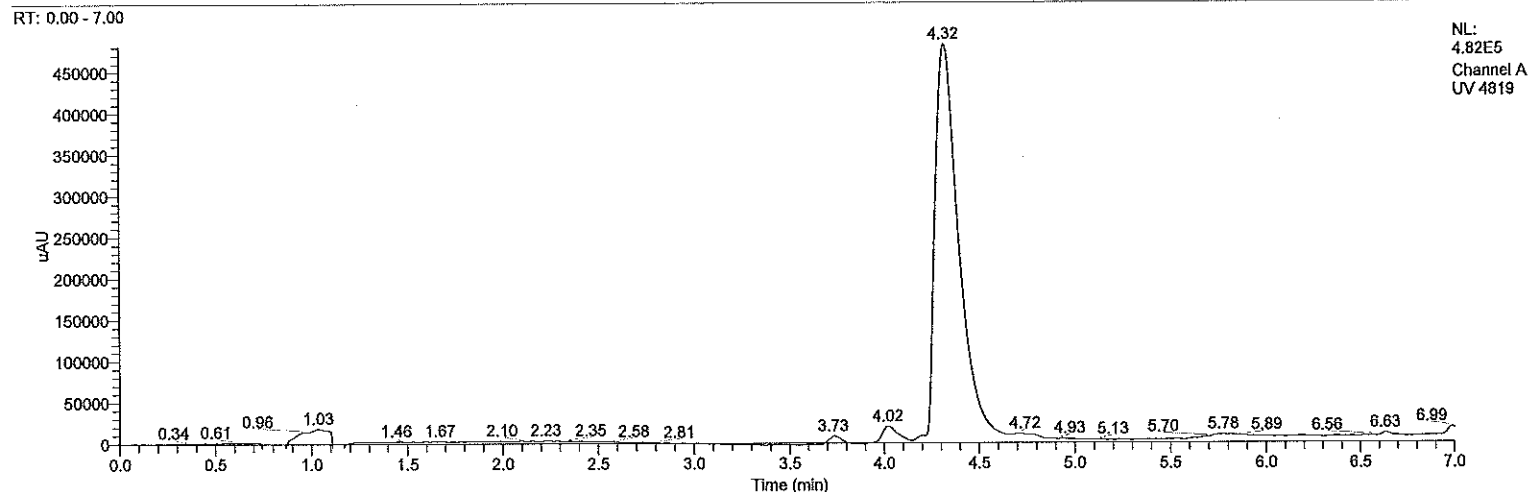



2-4-02 #299-321 RT: 4.09-4.33 AV: 23 NL: 5.16E8  
T: + c ESI Full ms [ 150.00-800.00]

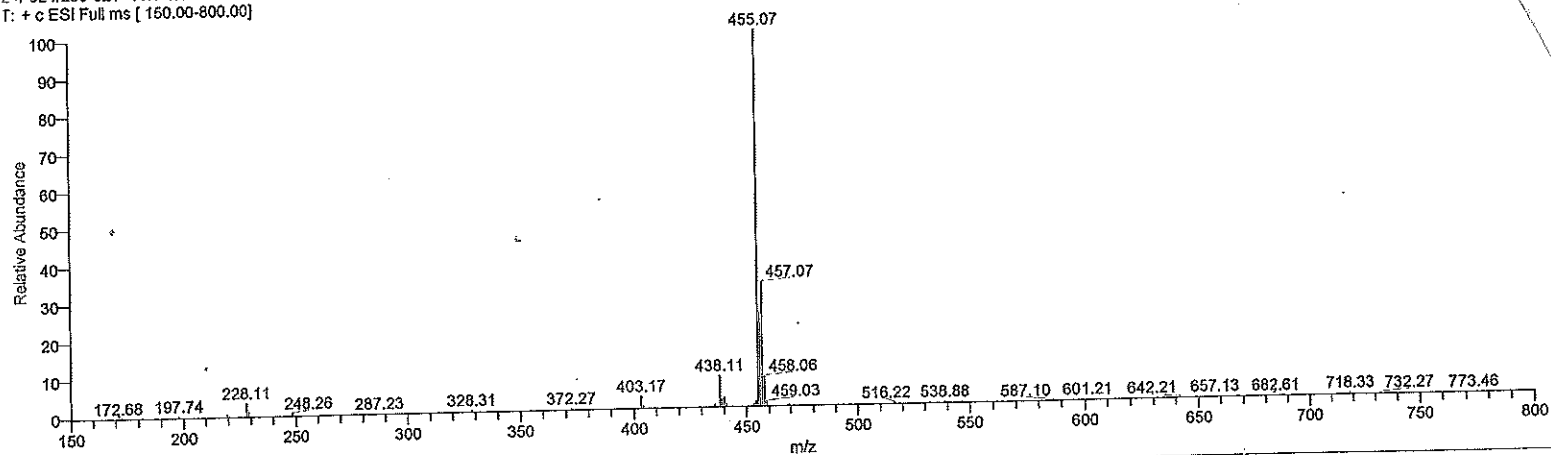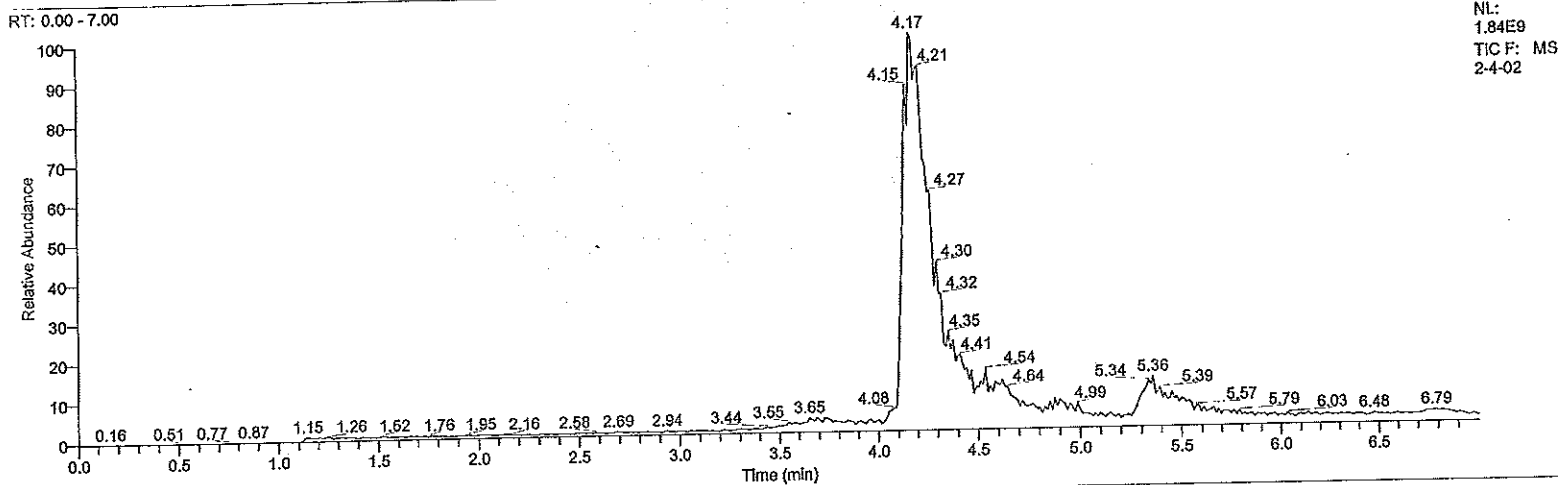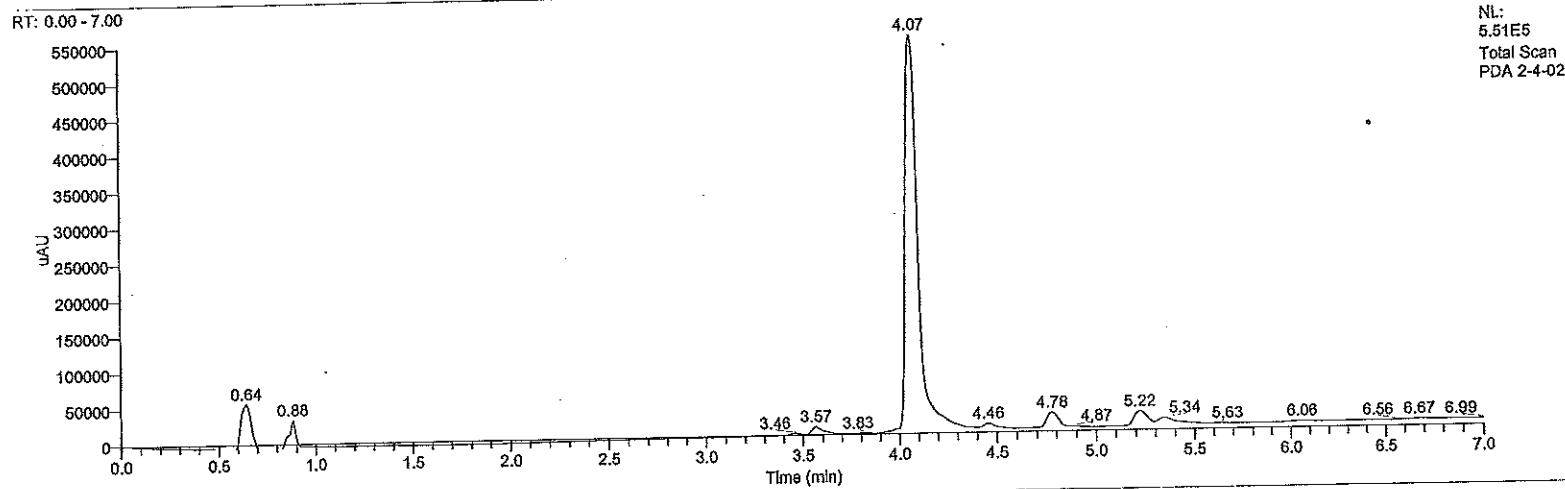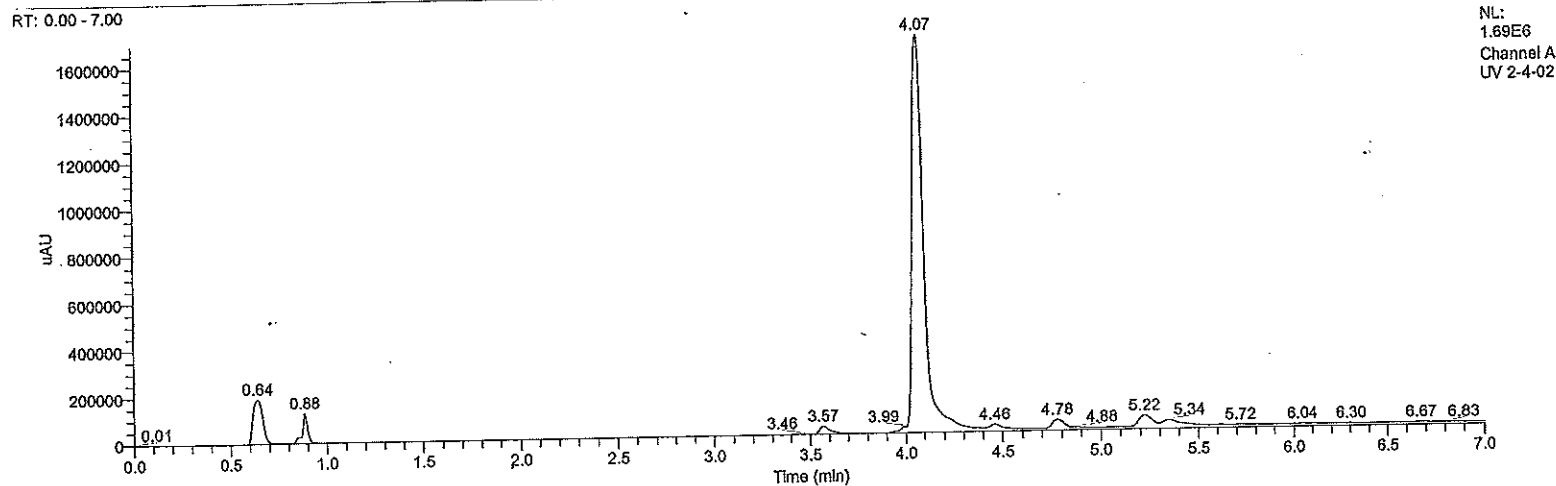

1-13-01 #296-314 RT: 3.98-4.19 AV: 19 NL: 6.50E7  
T: + c ESI Full ms ( 150.00-800.00)

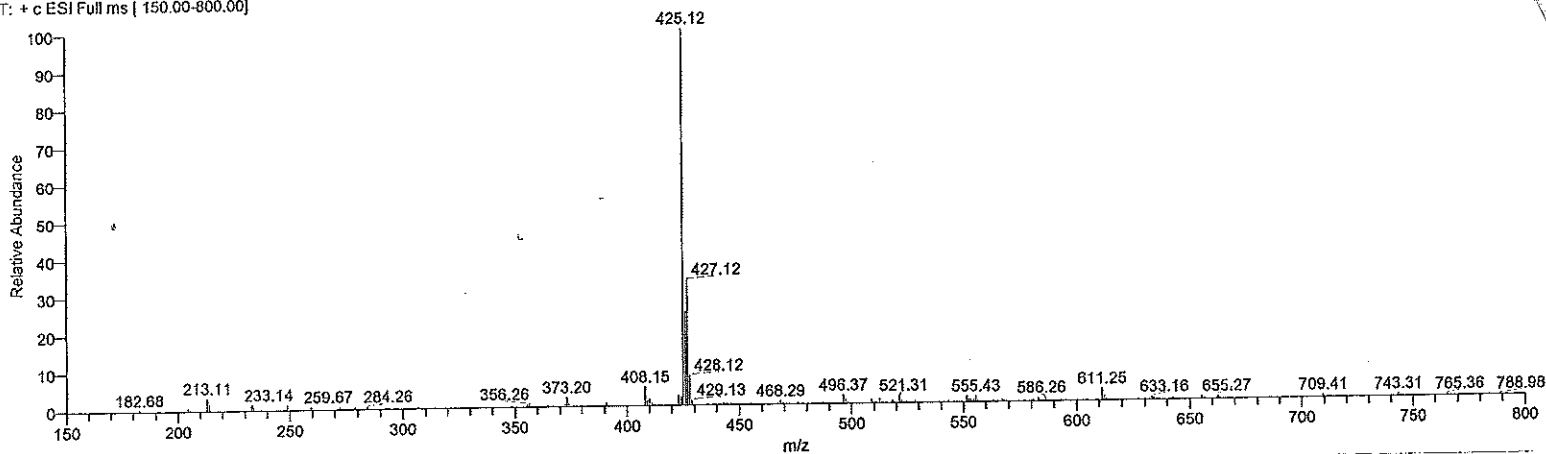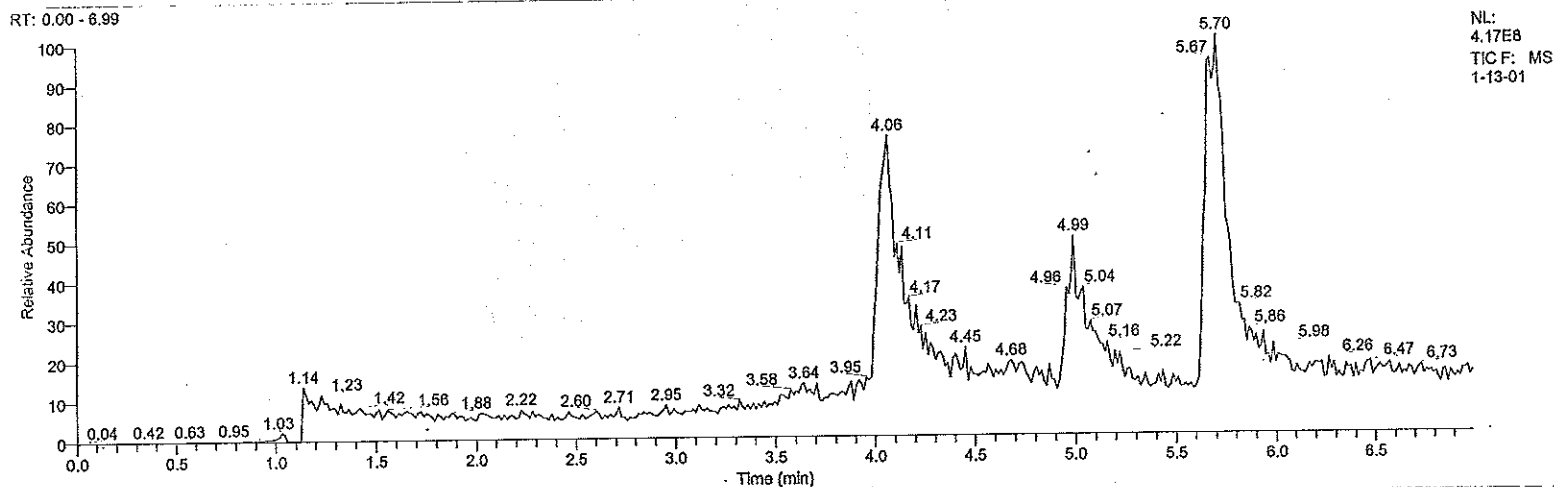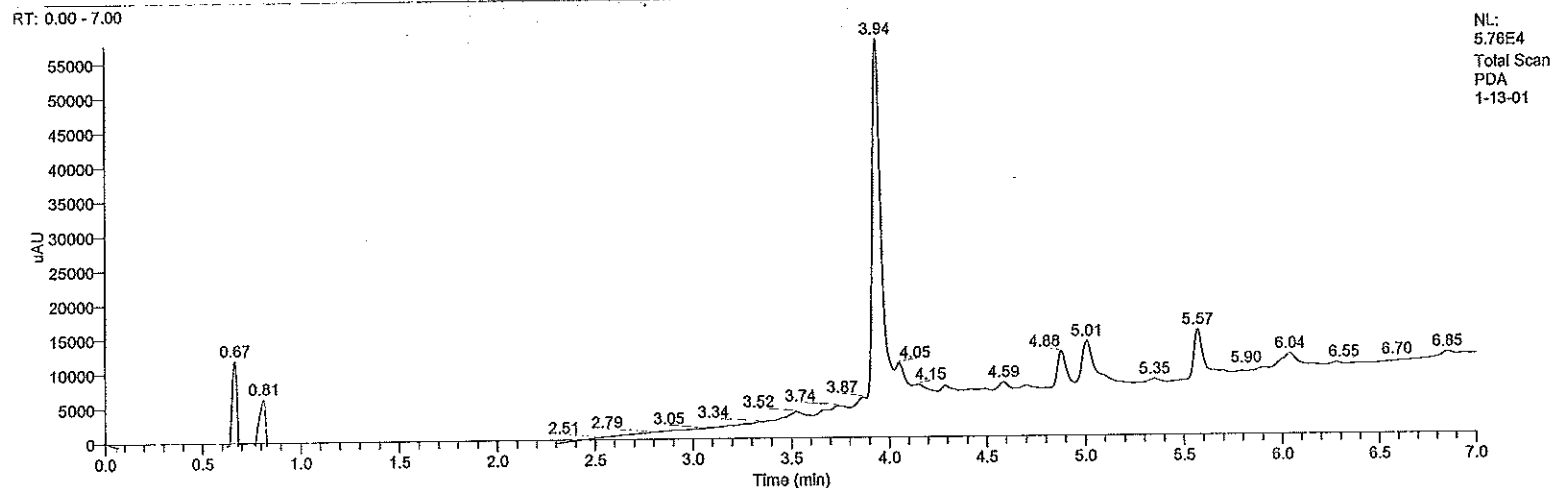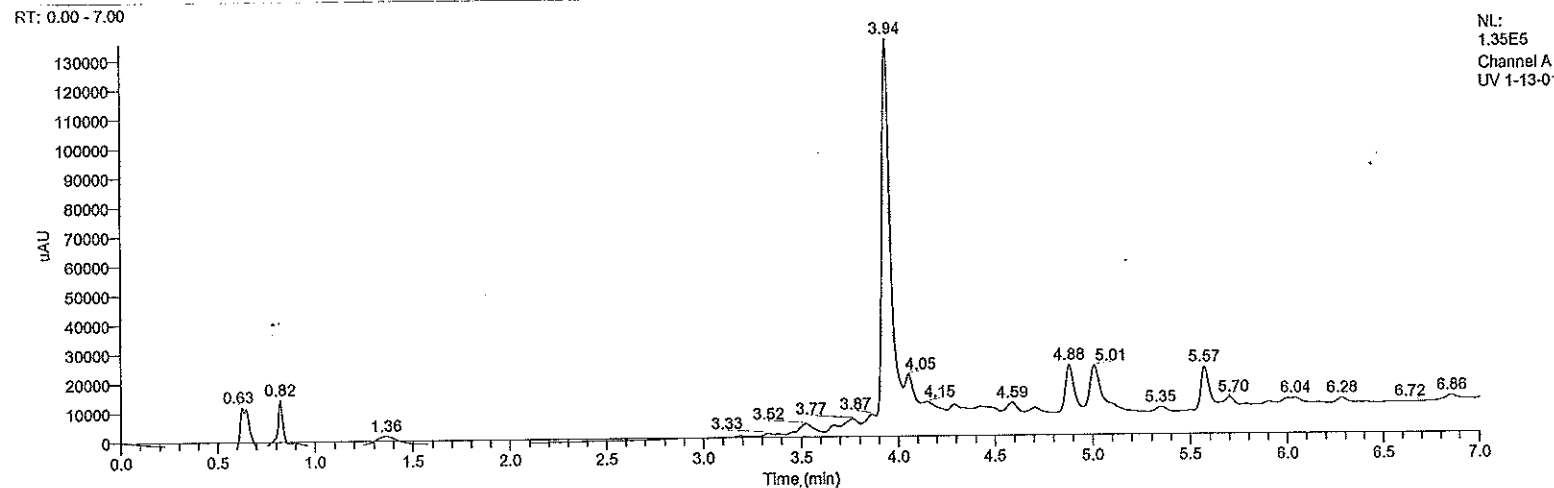

Compound 45

I-14-04 #334-345 RT: 4.36-4.49 AV: 12 NL: 8.78E7  
T: + c ESI Full ms [150.00-800.00]

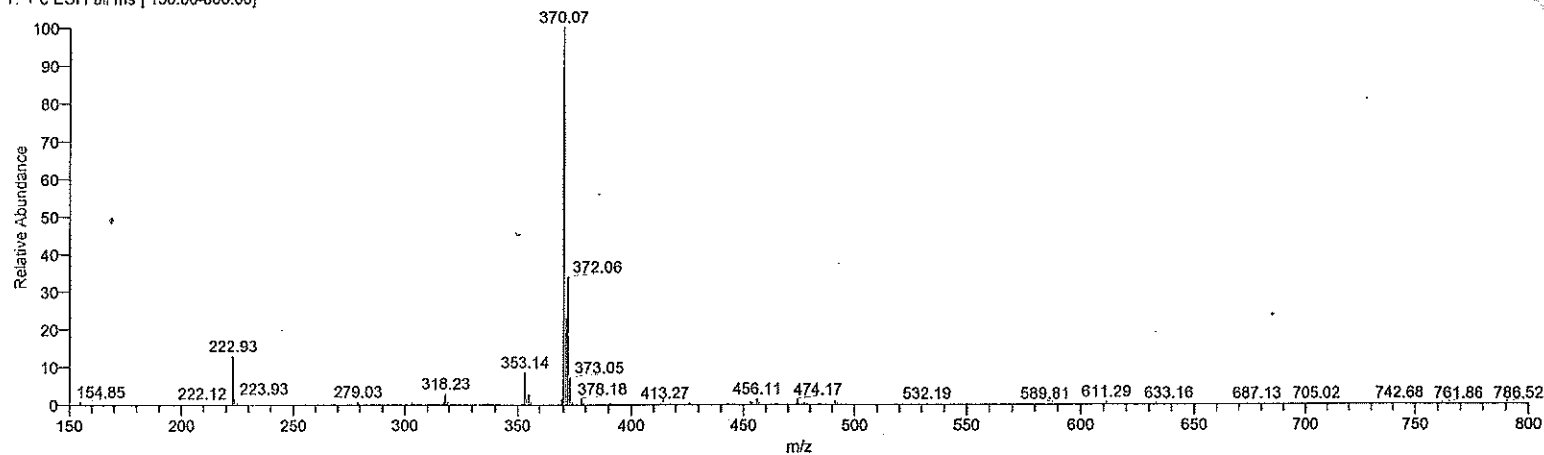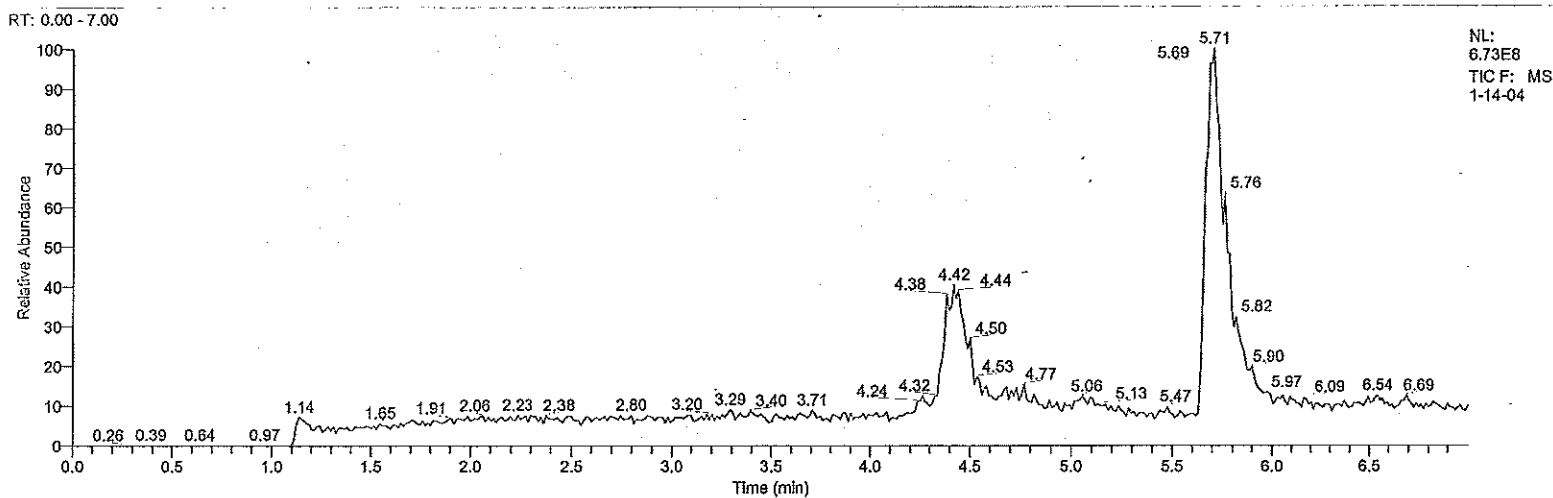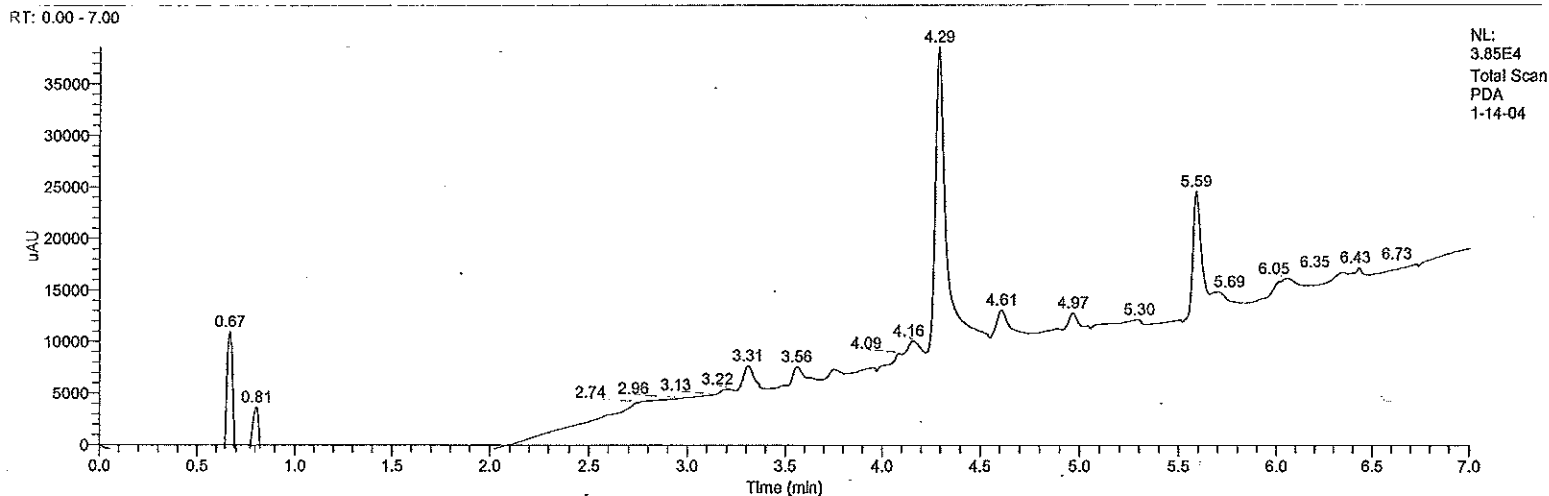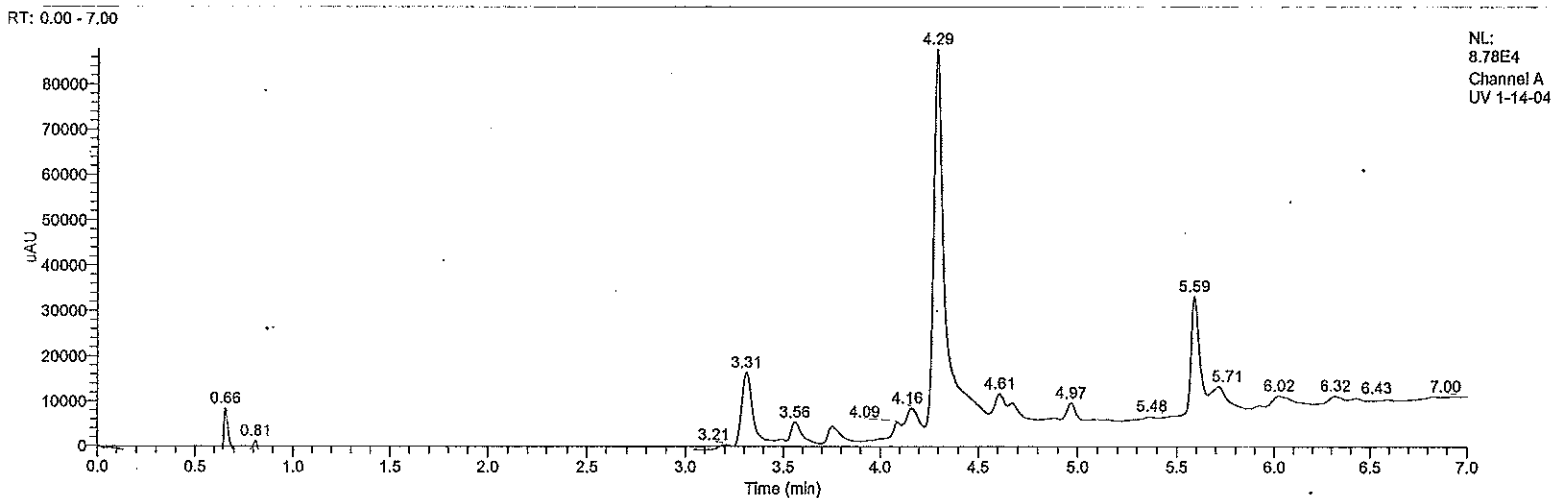

Compound 4b

2-18-03 #371-394 RT: 5.11-5.36 AV: 24 NL: 2.19E8  
T: + c ESI Full ms [150.00-800.00]

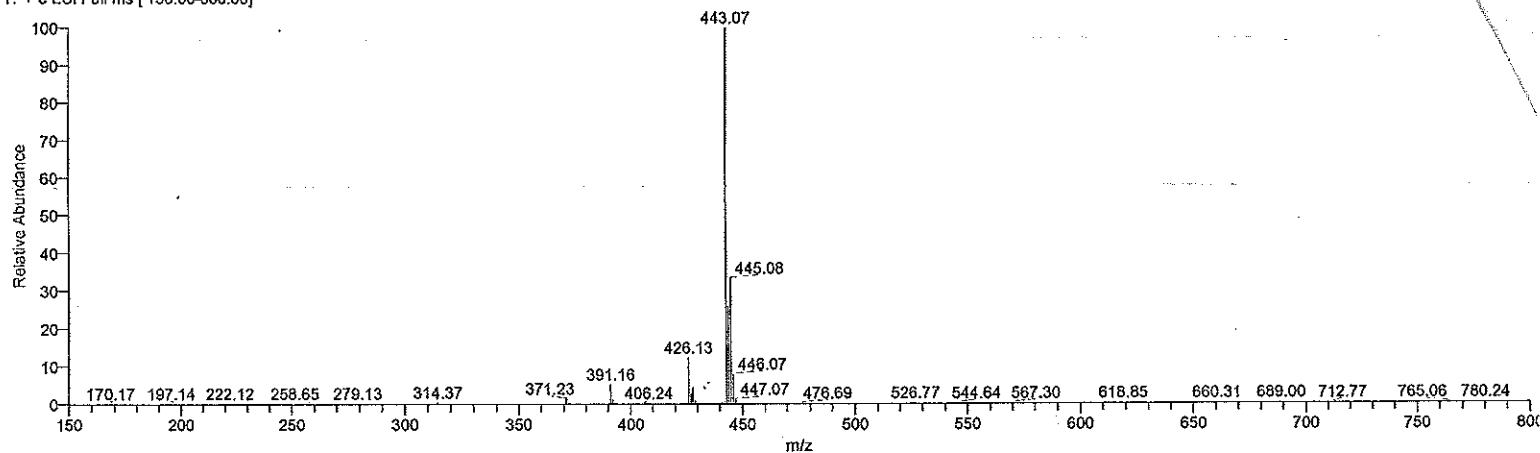

RT: 0.00 - 6.99

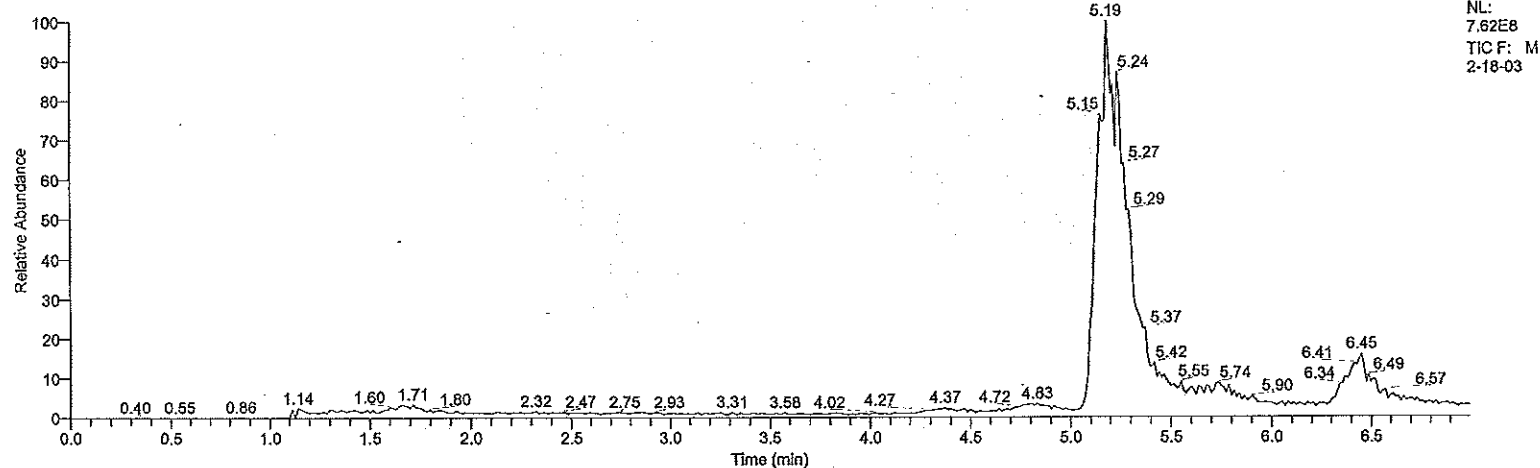

NL:  
7.62E8  
TIC F: M  
2-18-03

RT: 0.00 - 7.00

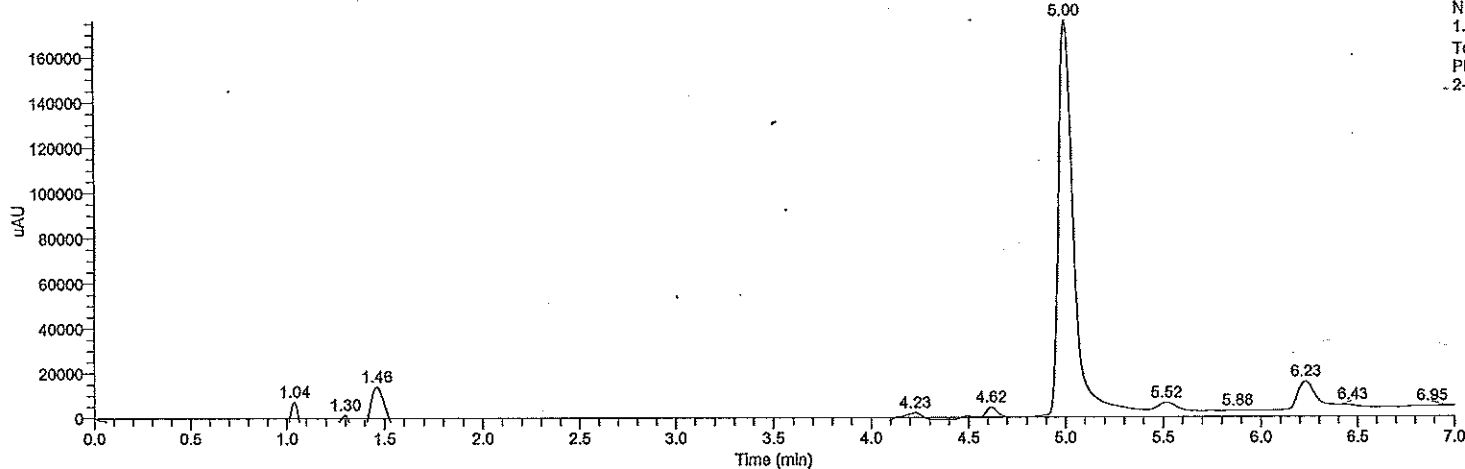

NL:  
1.76E5  
Total Scan  
PDA  
2-18-03

RT: 0.00 - 7.00

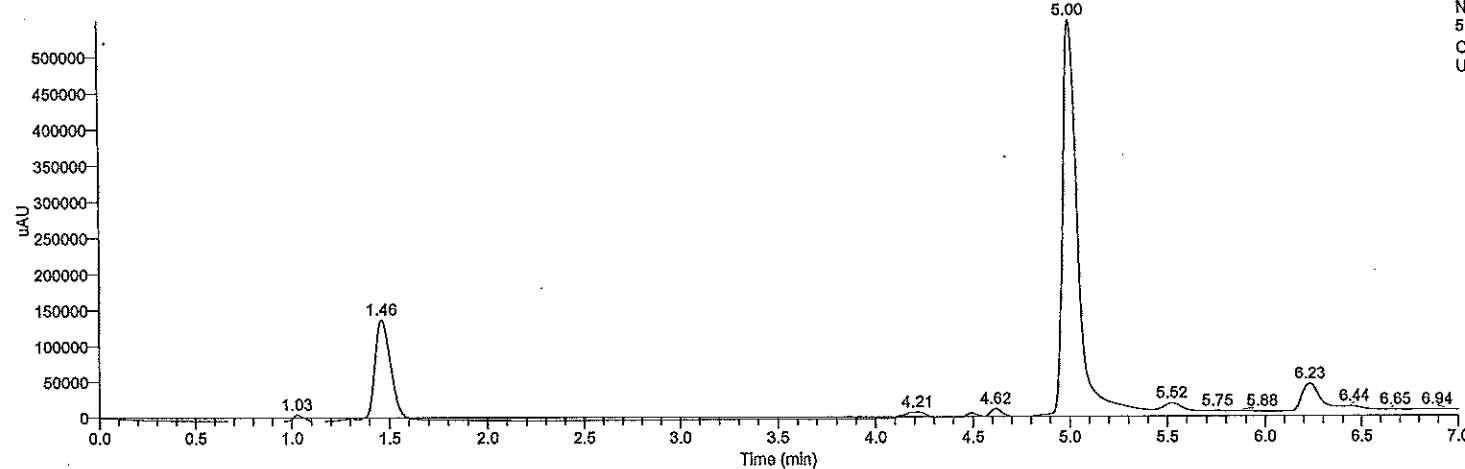

NL:  
5.50E5  
Channel /  
UV 2-18-C

Compound 47

4-01 #287-307 RT: 3.93-4.15 AV: 21 NL: 3.09E8  
+ c ESI Full ms [ 150.00-800.00]

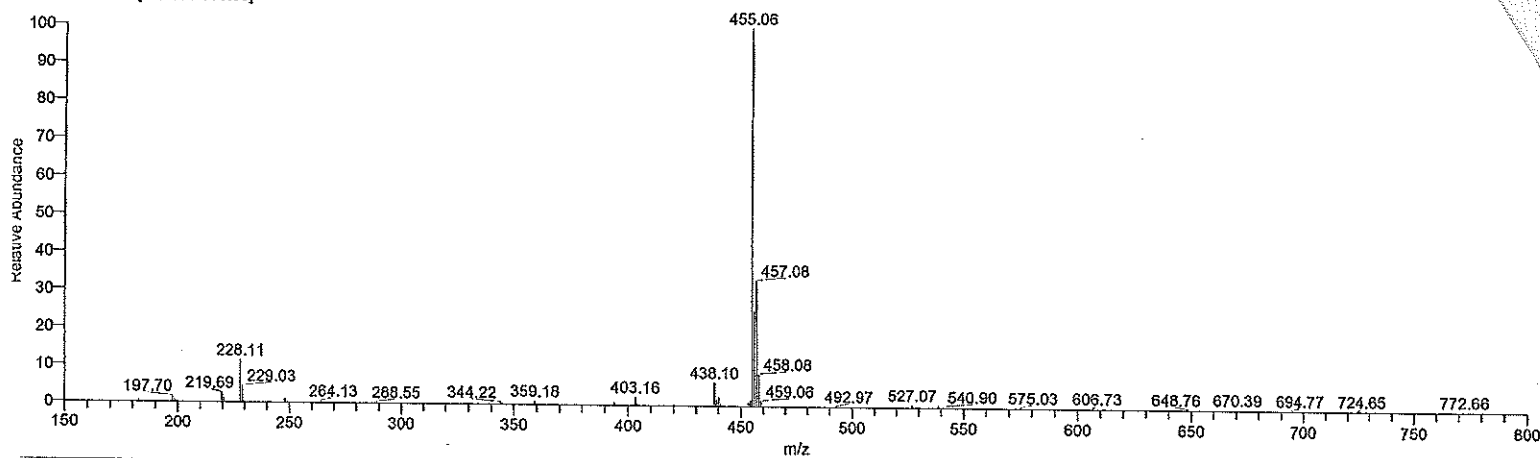

T: 0.00 - 7.00

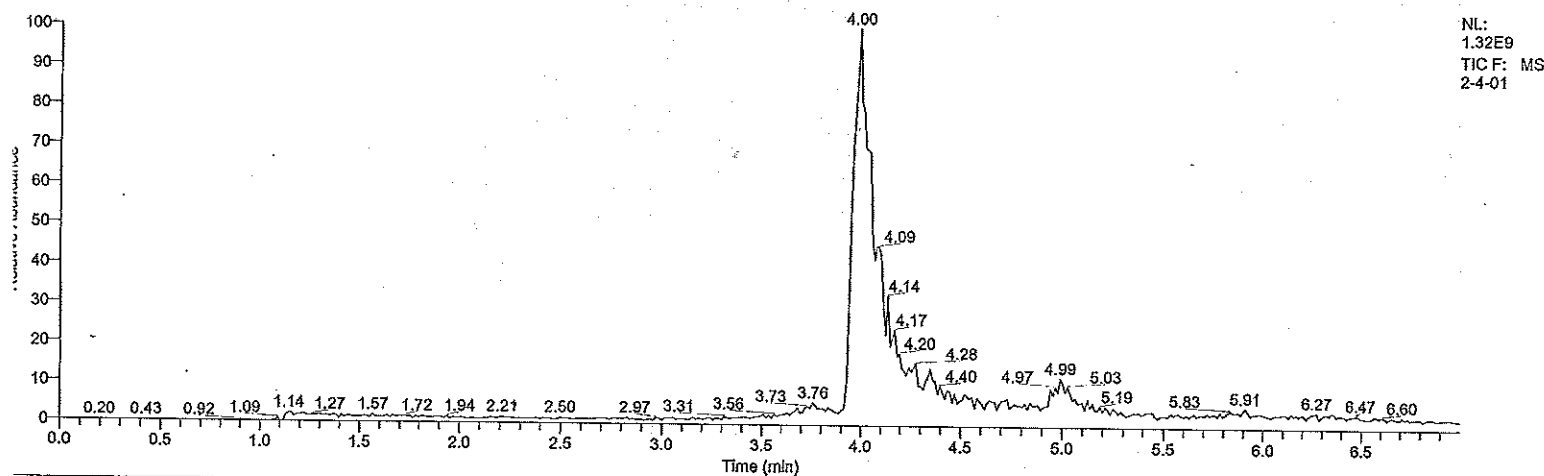

NL:  
1.32E9  
TIC F: MS  
2-4-01

: 0.00 - 7.00

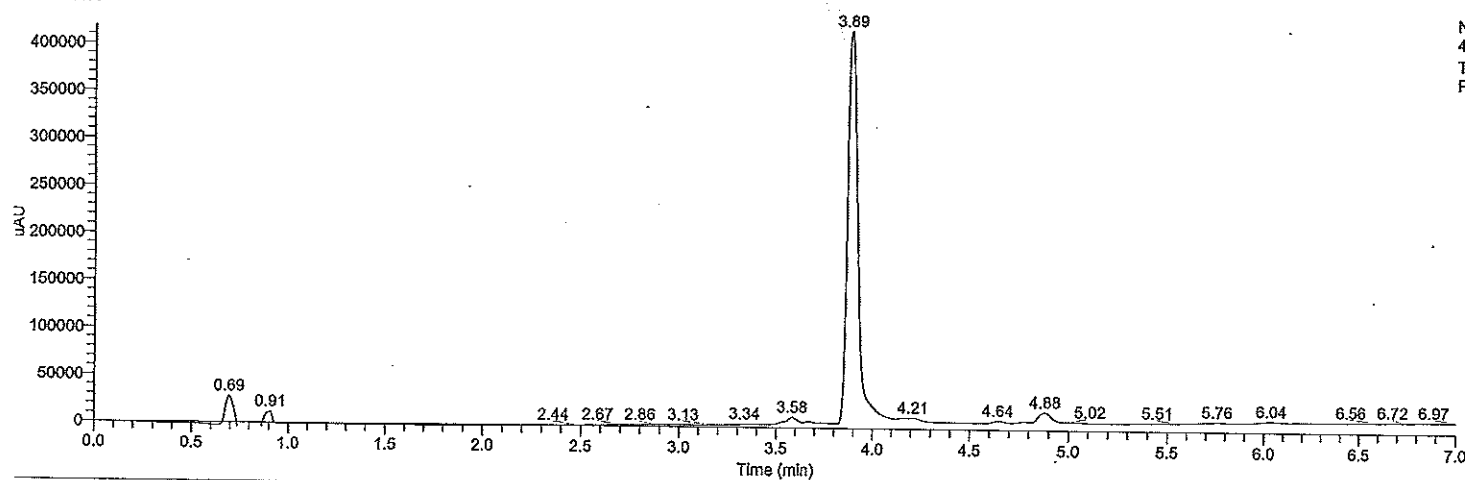

NL:  
4.18E5  
Total Scan  
PDA 2-4-01

0.00 - 7.00

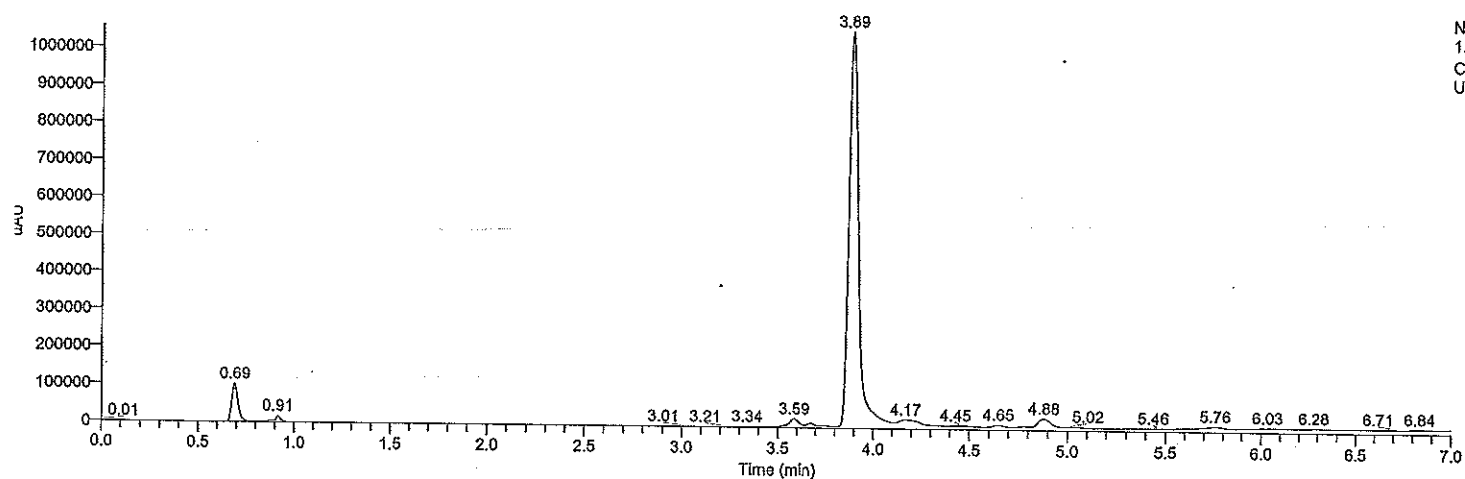

NL:  
1.06E6  
Channel A  
UV 2-4-01

Compound 48

2-13-04 #411-431 RT: 5.70-5.93 AV: 21 NL: 1.25E8  
 T: + c ESI Full ms [ 150.00-800.00]

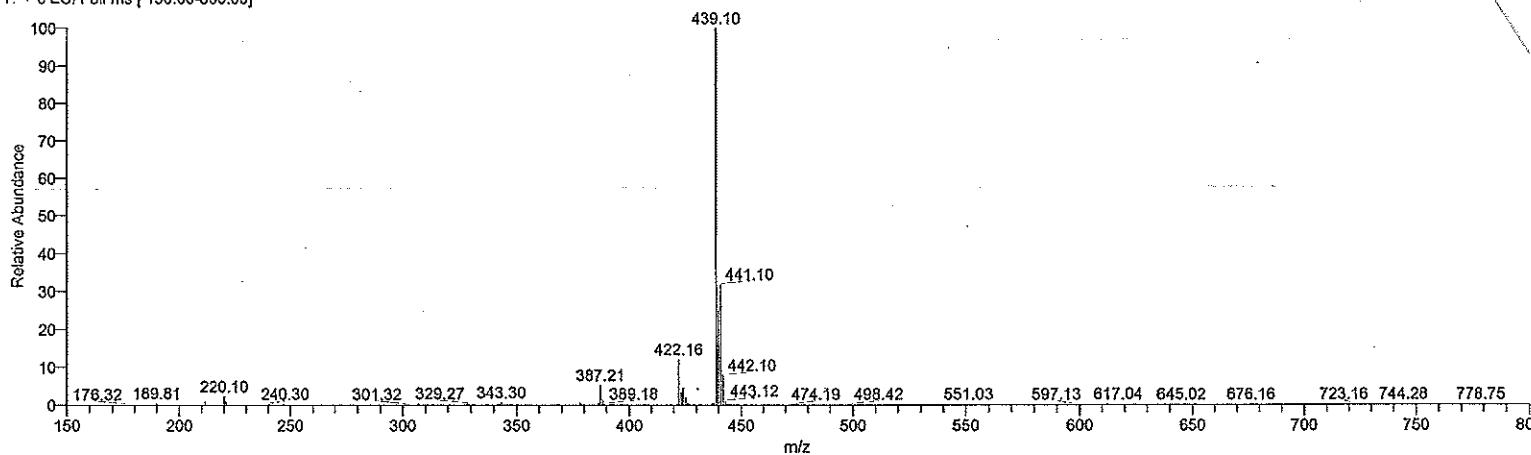

RT: 0.00 - 7.00

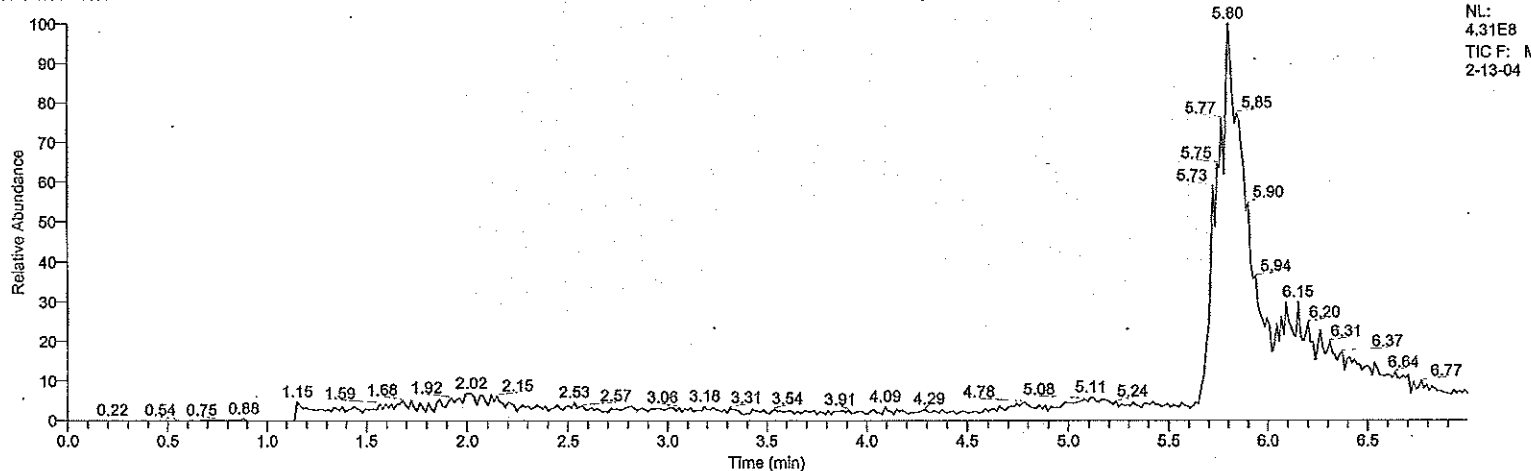

NL: 4.31E8  
 TIC F: A  
 2-13-04

RT: 0.00 - 7.00

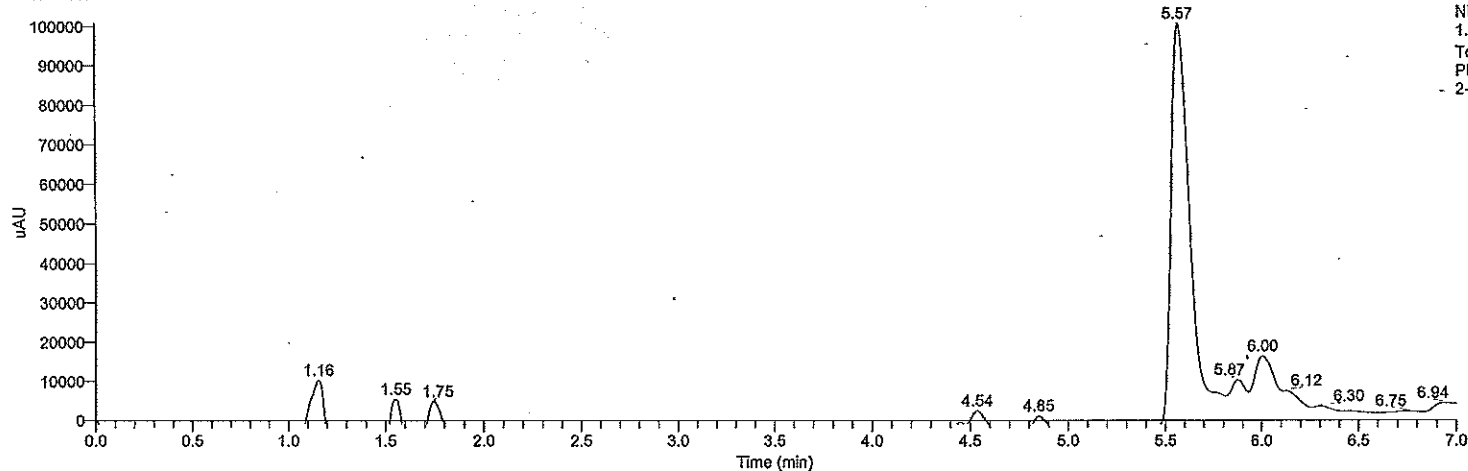

NL: 1.01E5  
 Total Scs  
 PDA  
 2-13-04

RT: 0.00 - 7.00

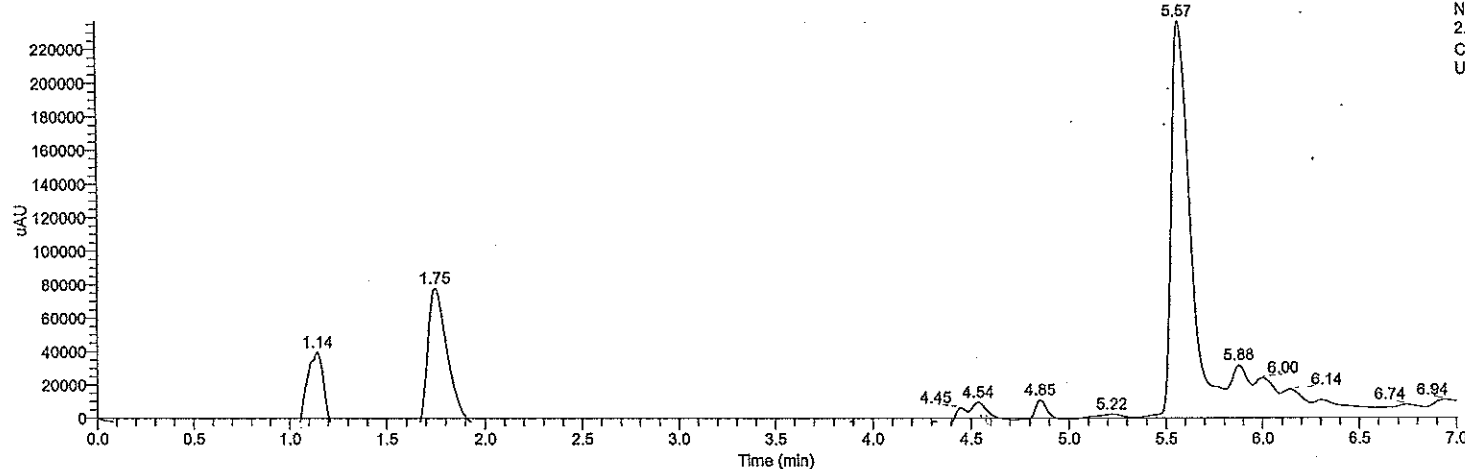

NL: 2.37E5  
 Channel:  
 UV 2-13-

2/17/2009 8:58:31 AM

Compound 49

2-17-01 #391-416 RT: 5.36-5.84 AV: 26 NL: 2.18E8  
T: + c ESI Full ms [150.00-800.00]

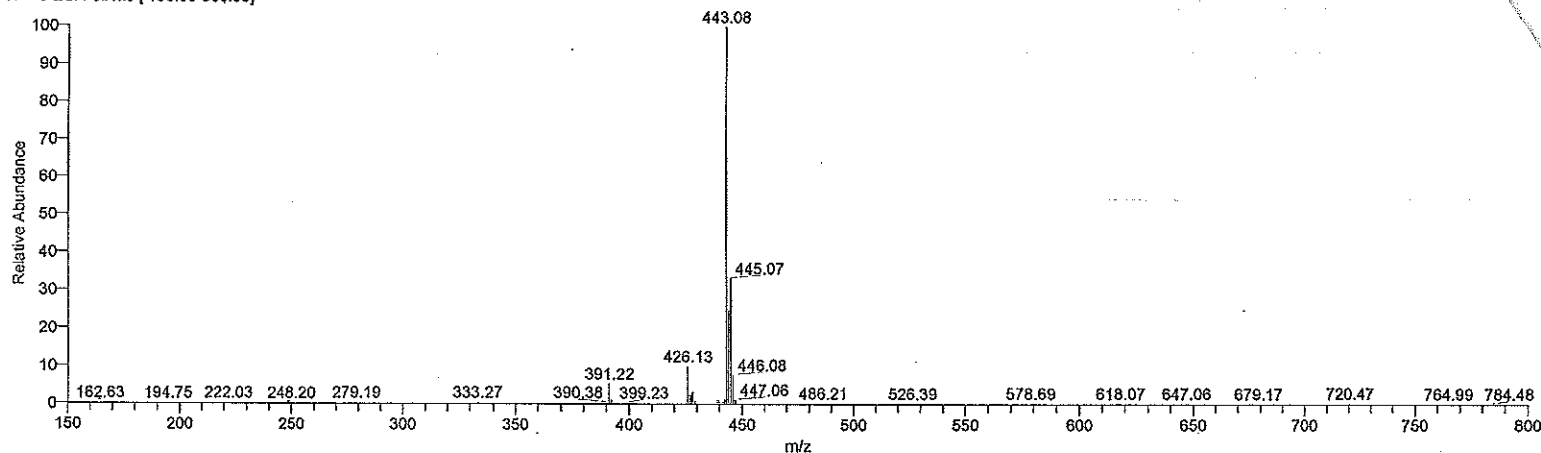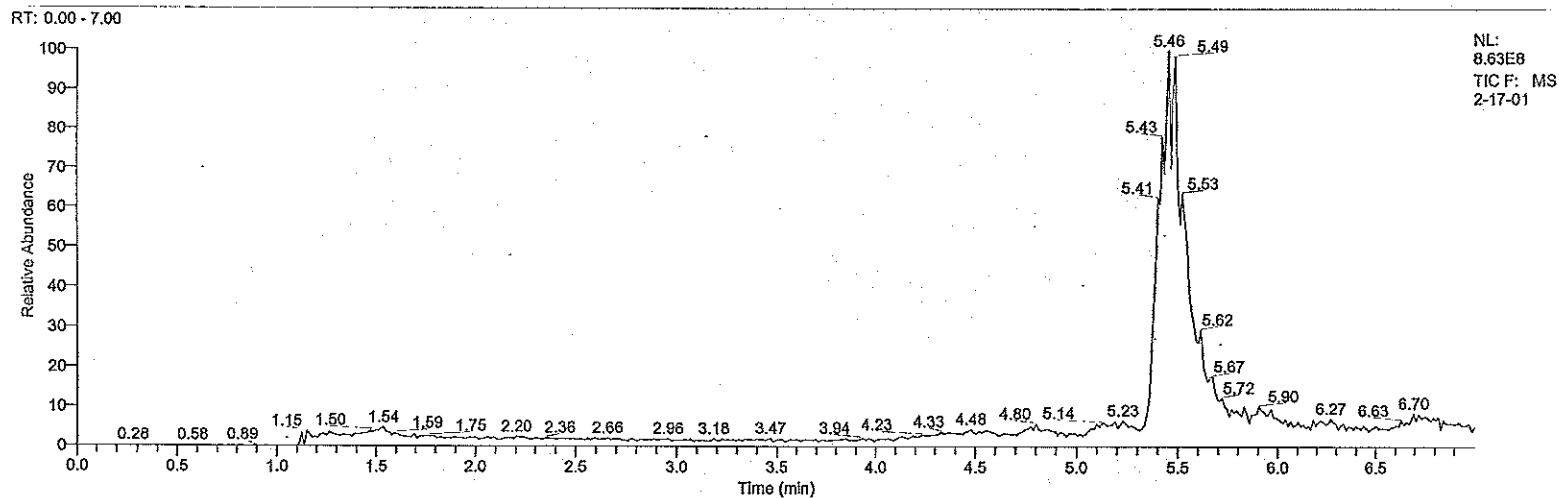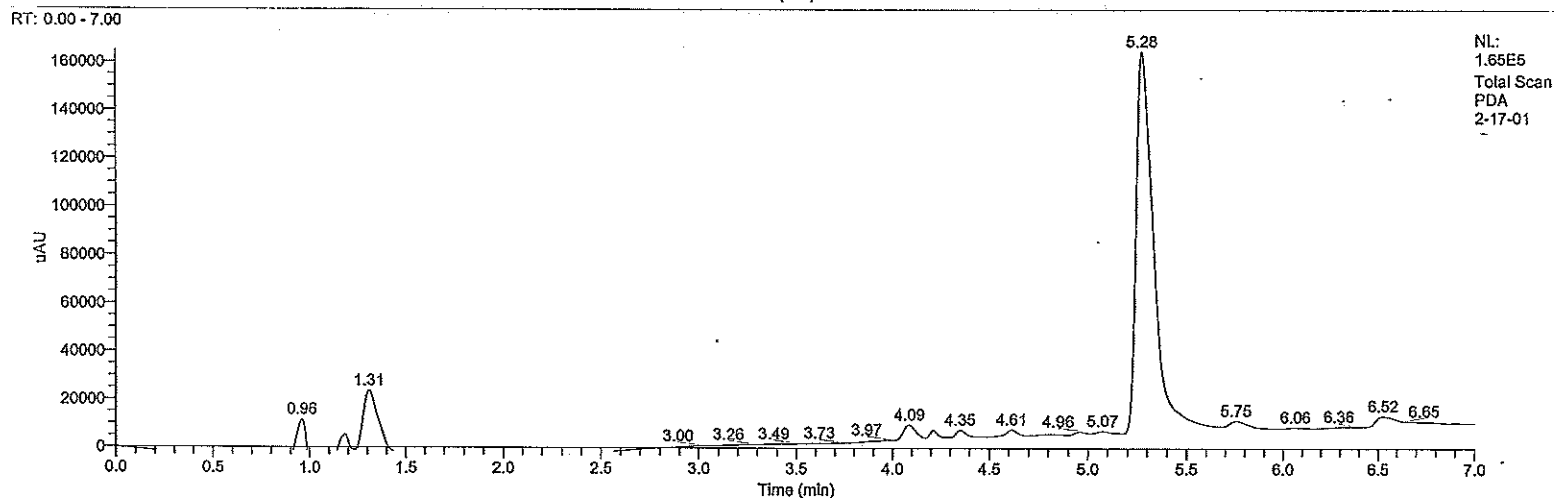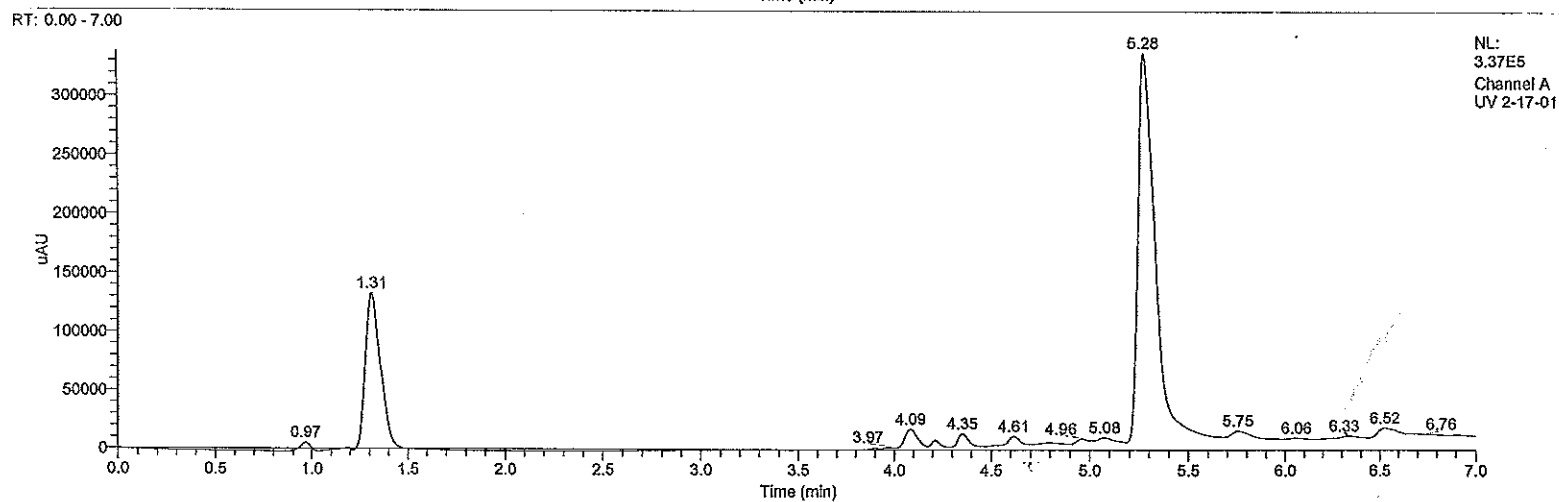

Compound 50

2-13-02 #360-386 RT: 4.90-5.19 AV: 27 NL: 1.79E8  
T + c ESI Full ms (150.00-800.00)

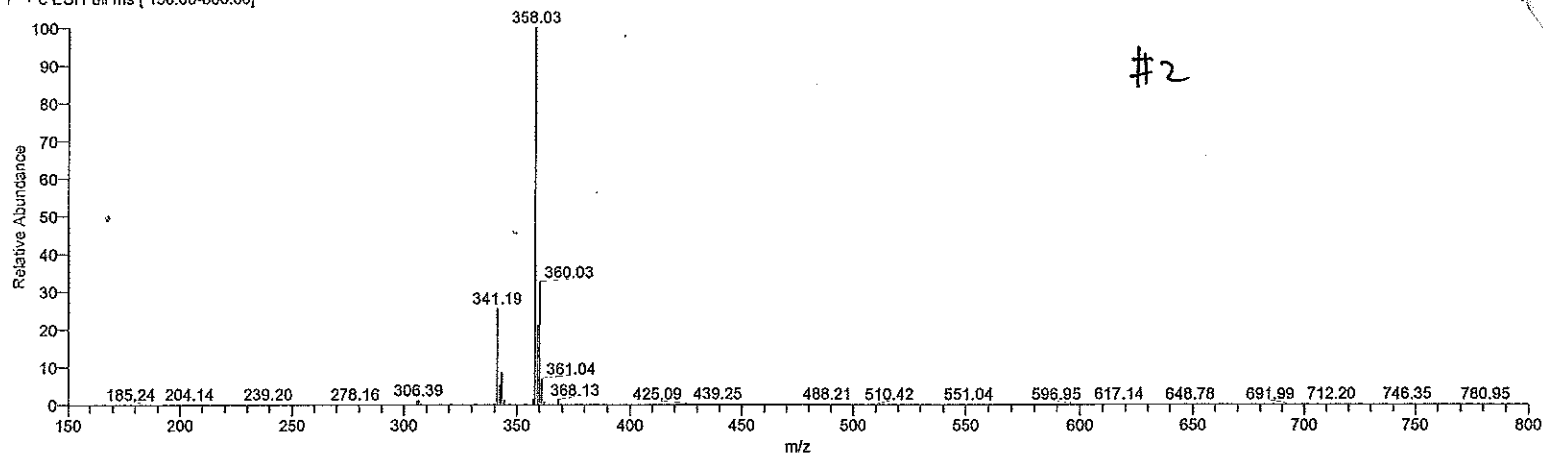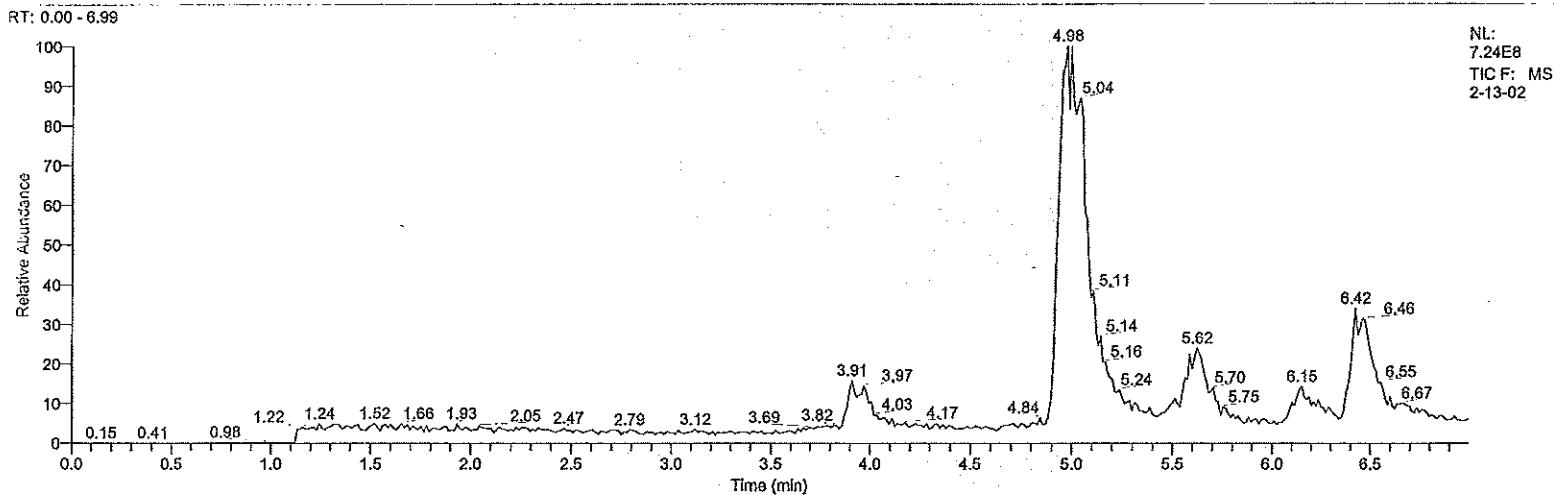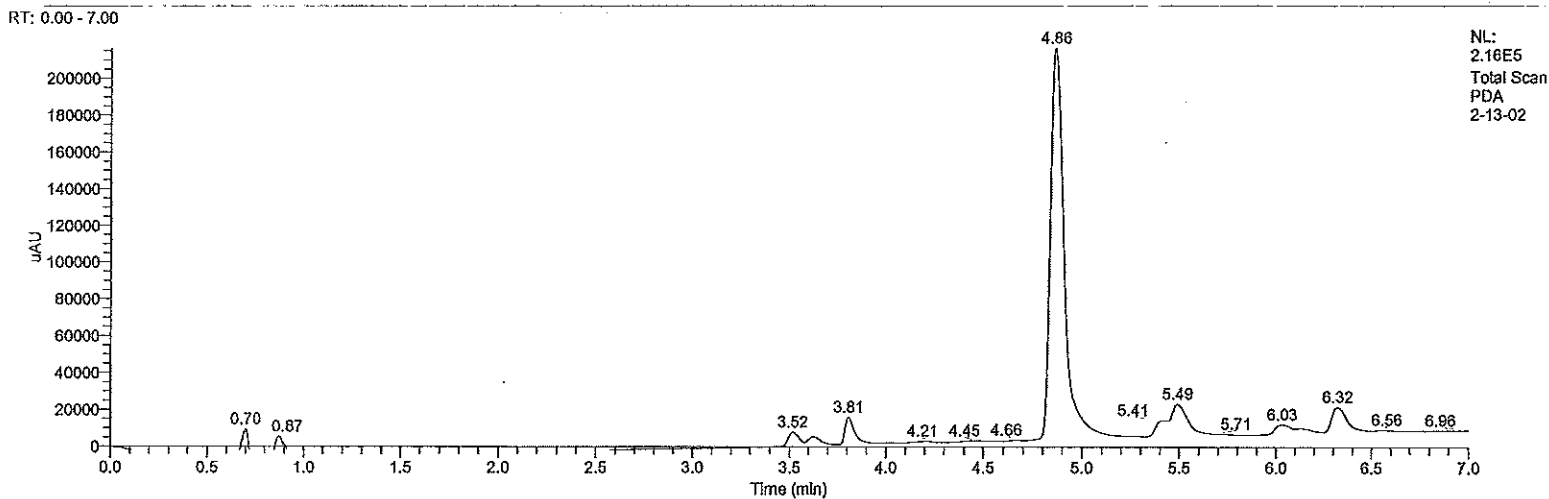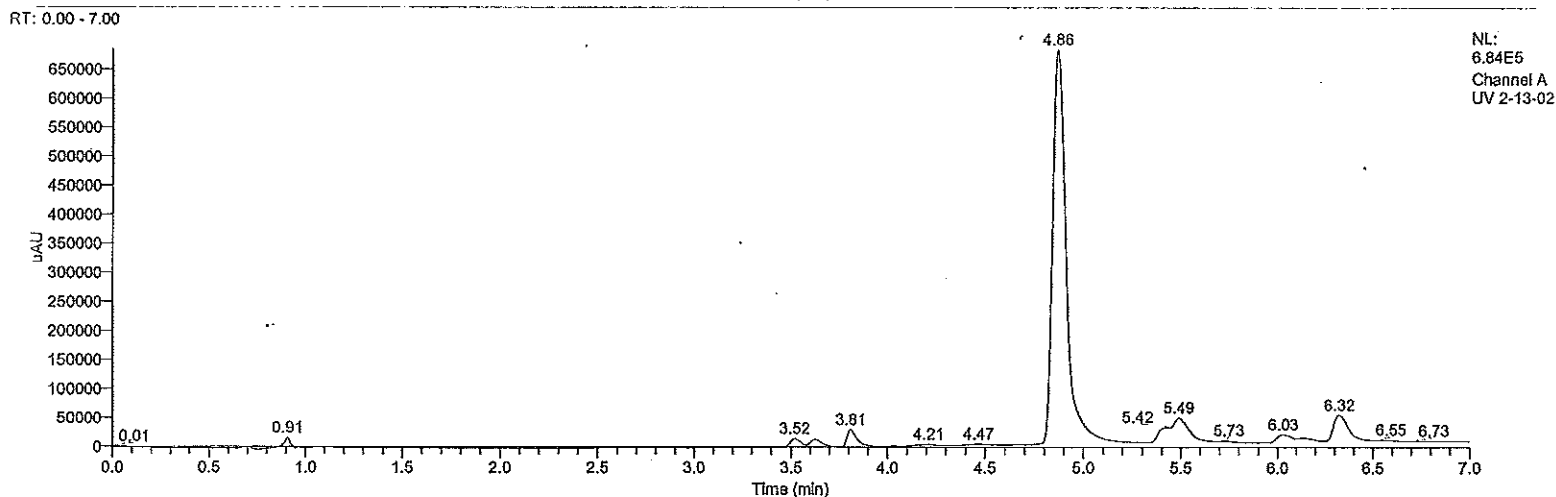



Compound 51 MW = 365.8

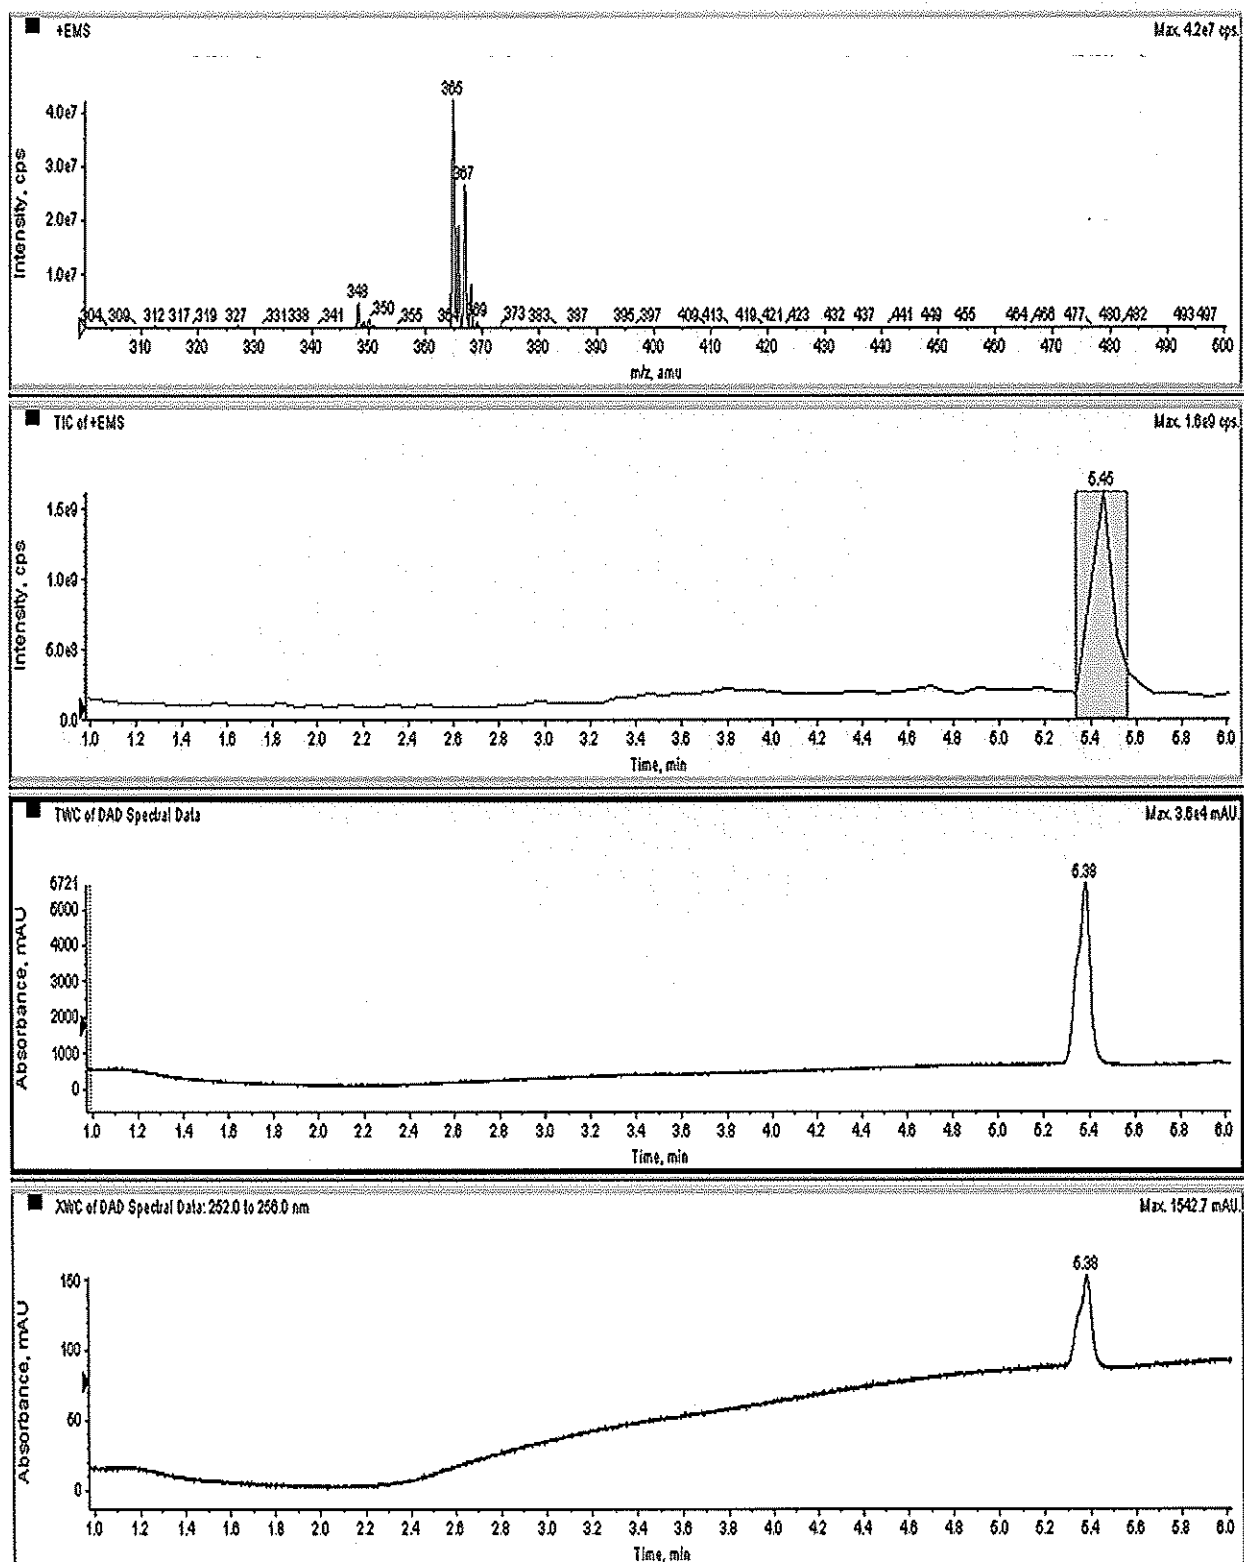

Compound 52

#1

2-13-01 #438-461 RT: 5.95-6.21 AV: 24 NL: 1.06E8  
T: + c ESI Full ms [150.00-800.00]

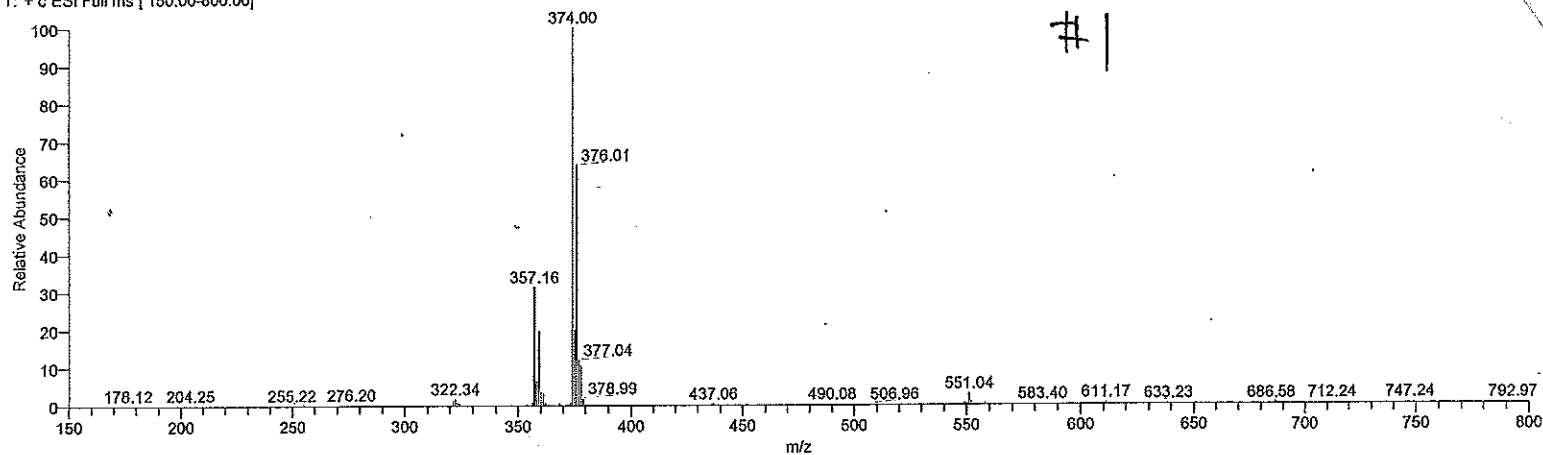

RT: 0.00 - 6.99

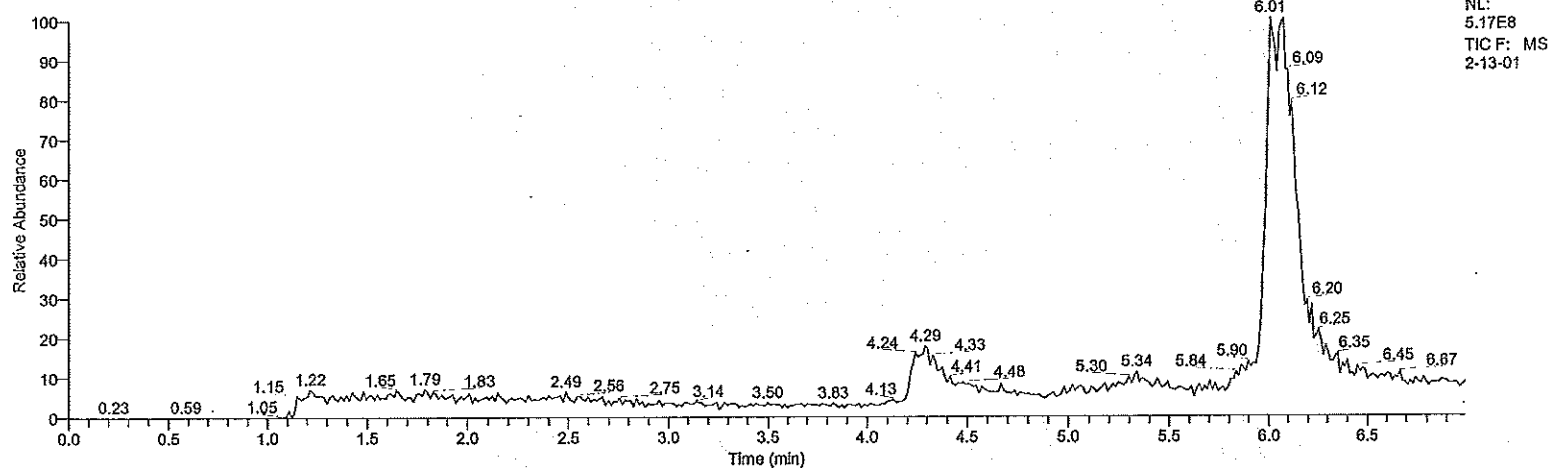

NL:  
5.17E8  
TIC F: MS  
2-13-01

RT: 0.00 - 7.00

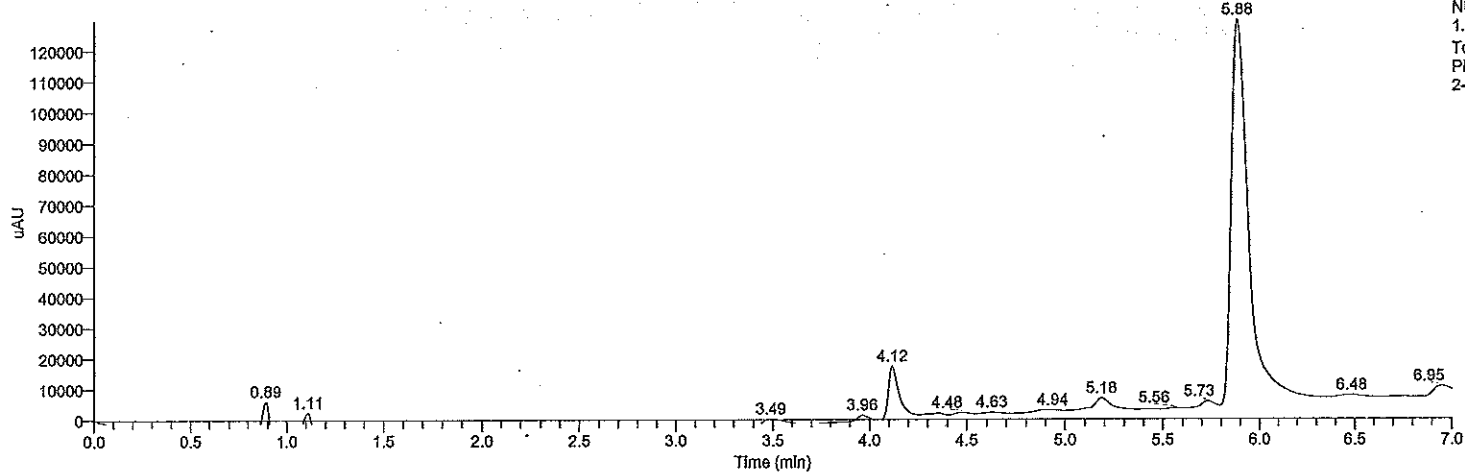

NL:  
1.29E5  
Total Scan  
PDA  
2-13-01

RT: 0.00 - 7.00

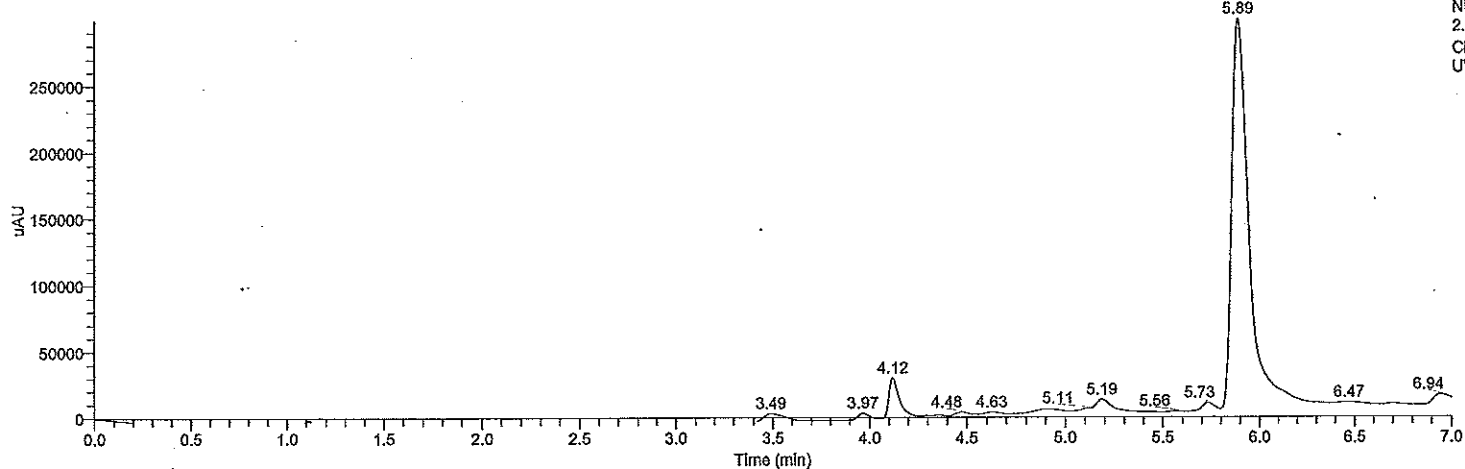

NL:  
2.99E5  
Channel A  
UV 2-13-01

Compound 53

2-17-03 #360-386 RT: 4.92-5.20 AV: 27 NL: 2.27E8  
T: + c ESI Full ms [ 150.00-800.00]

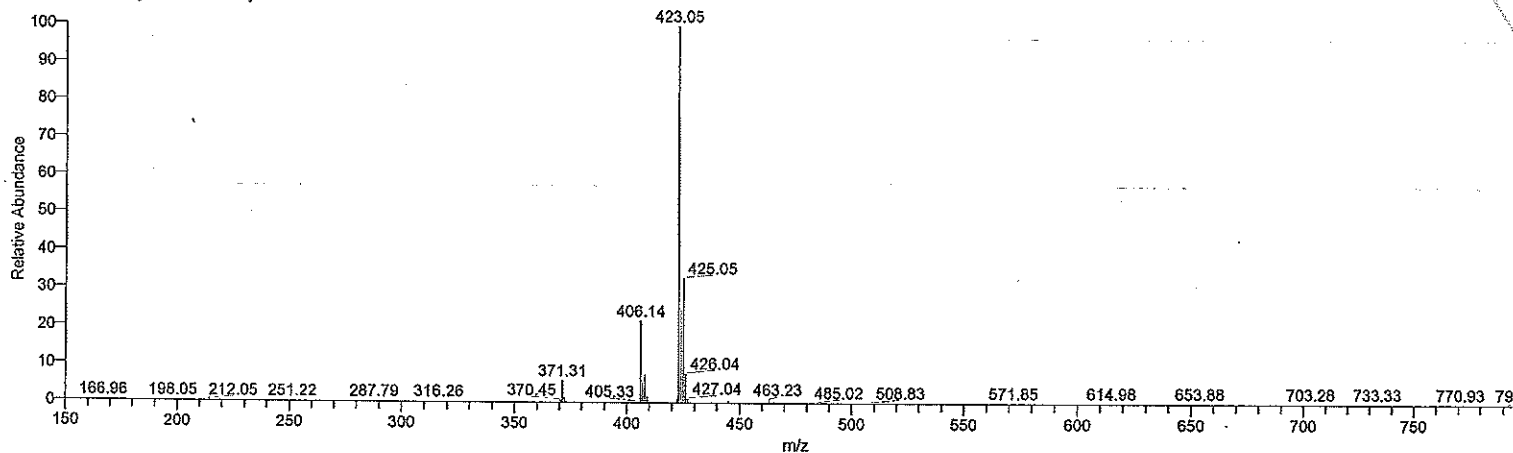

RT: 0.00 - 6.99

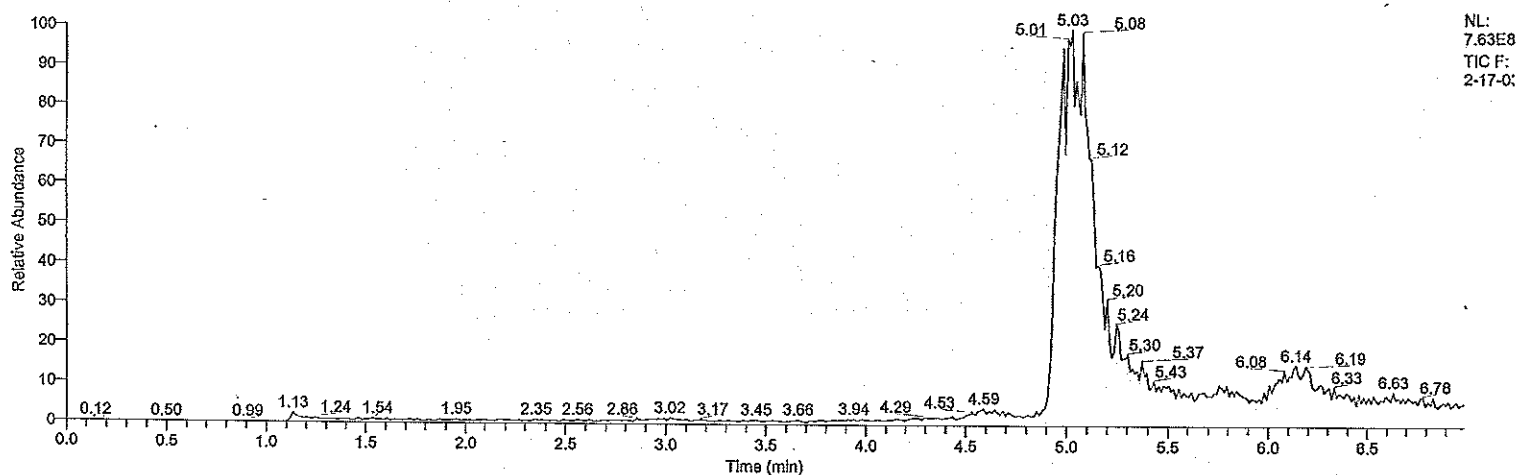

NL:  
7.63E8  
TIC F:  
2-17-0:

RT: 0.00 - 7.00

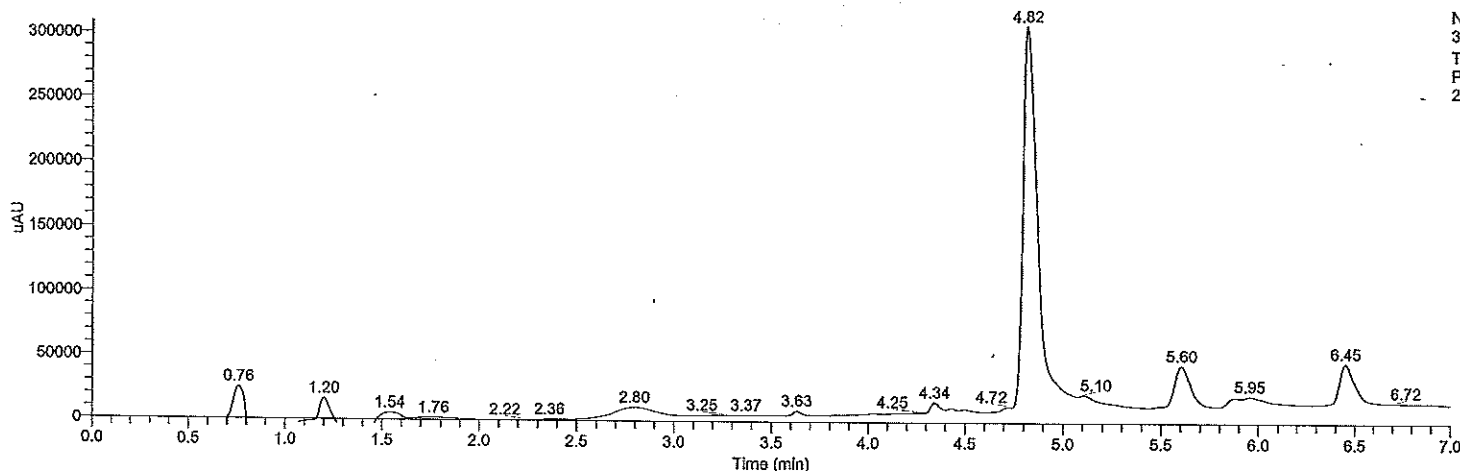

NL:  
3.09E5  
Total S  
PDA  
2-17-0:

RT: 0.00 - 7.00

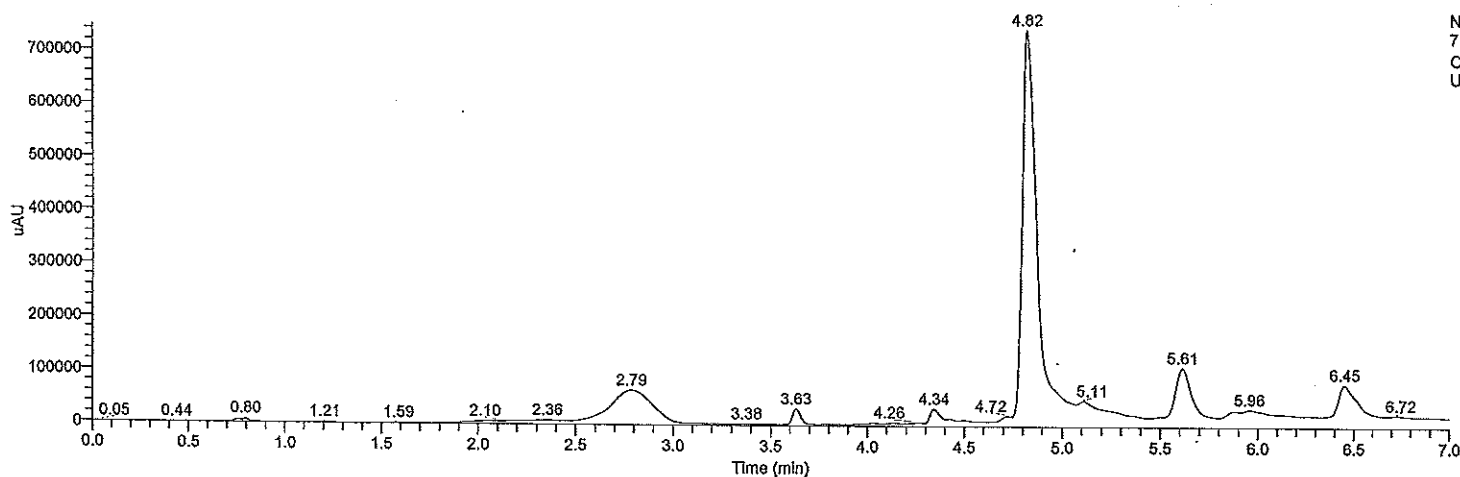

NL:  
7.47E5  
Chann:  
UV 2-1
